# Supplementary material for: Highly effective microporous and mesoporous metal–organic frameworks for effective ivermectin adsorption in water treatment and delivery systems
Source: RSC Adv. 2025 Apr 30;15(18):13924–39. doi: 10.1039/d5ra01662b (PMC12041861; doi:10.1039/d5ra01662b)
Supplement: RA-015-D5RA01662B-s001 [file RA-015-D5RA01662B-s001.xlsx]

## Sheet: Results
		IVER-B1aLoad				waterLoad				IVER-B1aHeat			waterHeat
Rank	filename	Average	Min	Max	Av_g IVM/g MOF	Average	Min	Max	Max_g S/g MOF	Average	Min	Max	Average	Min	Max	LCD	PLD	LCD/PLD	LFPD	cm3_g	NASA_m2_cm3	NASA_m2_g	AV_VF	AV_cm3_g	NAV_cm3_g	All_Metals
5	QOYYOU_clean	7.65	4	8	0.0821962	68.73	45	97		54.43	24.69	78.49	5.53	-1.5	12.59	20.9843	4.51928	4.64329	20.9841	0.928139	0	0	0.703	0.75743	0	Zn
18	MACHIJ_clean	1.37	1	2	0.0906825	17.22	6	31		76.14	38.59	104.19	6.99	-0.8	13.89	13.2962	4.97277	2.67379	13.2962	0.983012	0	0	0.67	0.681578	0	Zn
20	FAYPAY_clean	3.27	0	4	0.108515	23.75	6	43		63.53	18.09	83.59	5.65	-3	12.19	12.9079	5.24047	2.46313	12.8925	0.673936	0	0	0.742	1.10099	0	Zn
9	GOBGAG_clean	1	1	1	0.0966893	13.58	4	26		57.05	35.29	79.99	6.93	-0.7	13.59	17.2644	5.3381	3.23418	17.2644	1.05121	0	0	0.6532	0.621382	0	Cd
8	GIXGOK_clean	2	2	2	0.0966893	21.27	9	34		53.88	37.39	72.59	6.63	-1.3	13.89	17.3694	5.40179	3.21548	17.3694	1.04037	0	0	0.6542	0.628815	0	Cd
8	YEYCUC_SL	0.07	0	1	0.00262784	11.91	2	26		41.9	9.29	49.69	5.13	-1.5	11.09	17.8235	5.70059	3.1266	17.8235	0.555715	0	0	0.7742	1.39316	0.000719793	Zr
20	UMODEH16_clean	1	1	1	0.11496	84.12	71	103		79.26	64.69	93.89	16.19	-1	51.99	13.0256	5.98917	2.17485	13.0256	0.473838	0	0	0.8008	1.69003	0	Cu
10	ADUWON_clean	1	1	1	0.0916897	18.74	7	35		64.38	47.29	88.09	6.11	-2.3	15.09	16.3793	5.99724	2.73115	16.3793	0.521247	0	0	0.7844	1.50485	0	Ni
7	ja110042b_si_003_clean	1	1	1	0.125692	7.17	0	21		58.47	44.39	80.19	5.44	-1.5	12.69	18.775	6.41603	2.92626	18.7227	0.610707	0	0	0.7614	1.24675	0	Co
5	NEYVEU_clean	2	2	2	0.228864	5.37	0	19		48.04	33.29	68.99	4.77	-1.6	12.29	20.1817	6.42425	3.14149	20.0844	0.514184	0	0	0.7952	1.54653	0	Zn
12	NAYZOE_clean	0.98	0	1	0.0259035	377.9	246	438		81.94	13.59	99.29	16.14	-2.2	49.89	15.8231	6.52553	2.42481	15.8166	0.498918	0	0	0.813	1.62953	0	Cu
8	KUNSUJ_clean	1	1	1	0.113703	21	12	33		61.17	40.59	80.89	8.11	-1	16.79	17.8879	6.52688	2.74065	17.8879	0.635531	0	0	0.7634	1.2012	0	In,Eu
6	RAHNOF_clean	1	1	1	0.0872706	106.97	93	123		64.66	45.89	83.29	16.42	-0.7	52.09	19.0385	6.57368	2.89617	19.0385	0.594852	0	0	0.7766	1.30553	0	Cu
7	VUJBEI_clean	1	1	1	0.0893038	3.76	0	13		50.72	35.59	70.29	4.63	-1.3	11.99	18.4478	6.57566	2.80546	18.4478	0.562611	0	0	0.7874	1.39955	0	Zn
6	MUDTEL_clean	1	1	1	0.0905237	101.77	87	113		73.87	51.09	93.29	16.61	-0.4	49.29	19.0951	6.59272	2.8964	18.8508	0.559282	0	0	0.789	1.41074	0	Cu
7	ADASIJ_clean	0.42	0	1	0.0543621	101.51	87	115		77.51	31.49	90.39	16.78	-0.8	50.29	18.2344	6.60024	2.76268	18.2069	0.629251	0	0	0.765	1.21573	0	Cu
5	WUKXEH_clean	2.91	2	3	0.155735	169.08	121	197		70.17	27.69	106.59	12.96	-1	54.99	20.0874	6.60038	3.04337	20.0874	0.594513	0	0	0.7896	1.32814	0	Cu
6	MUDTAH_clean	1.62	1	2	0.212833	5.11	0	16		58.7	34.19	90.09	5.21	-2.4	12.19	18.8937	6.63386	2.84807	18.8937	0.562193	0	0	0.7916	1.40806	0	Zn
6	XICZAM_clean	0.48	0	1	0.0372488	37.3	26	53		60.36	33.99	79.39	9.82	-1.8	17.89	19.5214	6.64584	2.93738	19.5214	1.26176	0	0	0.7502	0.594564	0.000158508	Hf
5	YUZPOA_clean	3.92	3	4	0.208478	27.86	11	42		62.83	27.59	85.29	6.2	-1.8	13.69	20.0872	6.66271	3.01488	20.0872	0.597835	0	0	0.7894	1.32043	0	Zn
17	ic5029383_si_002_clean	1.46	0	2	0.145427	8.02	0	22		62.57	36.89	80.69	5.5	-0.9	12.39	13.8961	6.70448	2.07266	13.8745	0.615292	0	0	0.7826	1.27192	0	Zn
6	SIZPUN_clean	1	1	1	0.11305	18.48	4	38		72.08	56.09	92.19	6.46	-0.9	14.49	19.2254	6.71018	2.86511	19.225	0.693763	0	0	0.757	1.09115	0	Zn
6	XICNOO_clean	0.07	0	1	0.00593321	34.02	25	48		49.54	11.59	64.89	9.99	-0.3	17.49	19.6161	6.71064	2.92314	19.5496	0.903297	0	0	0.747	0.826971	0.000221411	Zr
8	ADASOP_clean	1	1	1	0.119418	7.12	0	20		54.04	37.89	71.99	5.52	-2.5	13.19	18.0726	6.71346	2.692	18.0726	0.63164	0	0	0.7846	1.24216	0	Zn
2	XICYUF_clean	4.51	4	5	0.0792782	150.89	90	183		61.44	20.69	94.09	9.49	-0.6	17.89	28.6789	6.71408	4.27145	28.6789	0.993033	0	0	0.7044	0.709342	0.000201403	Zr
6	XICNOO02_clean	0.99	0	1	0.0839125	39.24	27	52		67.35	5.39	85.09	10.15	-0.4	19.79	19.5902	6.72401	2.91346	19.5902	0.902602	0	0	0.7472	0.827829	0.000221582	Zr
10	OMIMEE_clean	1	1	1	0.0657391	183.99	140	208		74.67	50.59	93.29	18.77	-0.7	58.99	16.5457	6.7257	2.46007	16.5457	0.768319	0	0	0.7618	0.991516	0	Cu
9	ADASUV_clean	0.7	0	1	0.0844956	7.07	0	19		60.34	36.69	81.19	5.81	-2.1	13.19	17.1678	6.7332	2.54972	17.1678	0.625693	0	0	0.7672	1.22616	0	Co
3	IZEPEJ_clean	7.77	6	8	0.319849	20.9	8	40		48.08	13.89	73.69	5.81	-1.4	13.39	23.8744	6.75259	3.53559	21.6654	0.54542	0	0	0.7792	1.42862	0	Cr
6	REWNEO_clean	1	1	1	0.10727	112.28	92	131		65.54	53.29	89.29	16.65	-0.8	56.19	19.3732	6.76945	2.86186	10.1738	0.57834	0	0	0.79	1.36598	0	Cu
11	WAHNEB_clean	0.93	0	1	0.0333885	84.33	28	115		70.77	39.99	84.69	13.38	-2.6	37.59	15.9584	6.79866	2.34728	15.9584	0.49512	0	0	0.781	1.57739	0	Cu
8	WIRKOZ_clean	2.89	2	3	0.165464	23.39	10	40		59.72	18.89	86.89	6.89	-1.4	13.99	17.3855	6.83963	2.54187	17.3855	0.742862	0	0	0.6666	0.897341	0	Zn
6	XICNOO01_clean	1	1	1	0.0847601	39.55	32	51		64.08	50.09	80.19	9.98	-0.1	19.19	19.5043	6.85327	2.84599	19.4697	0.908856	0	0	0.7472	0.822132	0.000220057	Zr
4	KOZQEX_clean	17.23	12	18	0.309578	507.38	256	603		62	2.59	110.39	16.35	-8.8	49.29	22.4236	6.86083	3.26835	22.4236	0.430914	0	0	0.8428	1.95584	0	Cu
5	LEVLEF_clean	1	1	1	0.0680603	34.14	21	48		66.68	50.19	81.99	8.67	-0.5	15.59	20.181	6.8654	2.93952	20.181	0.883011	176.505	199.889	0.6154	0.696933	0	Mg
7	REWNEO01_clean	1	1	1	0.10727	110.42	92	124		74.68	52.49	95.29	16.89	-0.9	60.19	18.5111	6.94262	2.66629	11.7916	0.597667	0	0	0.7806	1.30608	0	Cu
11	WAHNIF_clean	0.91	0	1	0.0258129	58.51	17	90		68.43	11.69	81.89	7.51	-4.7	15.89	16.0273	6.94786	2.30679	16.0273	0.608079	0	0	0.7564	1.24392	0	Cu,Zr
11	c5cc10203k_c5cc10203k2_clean	0.7	0	2	0.0251311	80.58	36	112		62.66	28.09	77.49	14.77	-1.1	40.79	16.1105	7.03802	2.28907	16.1105	0.497	0	0	0.7782	1.5658	0	Cu
8	ALEJIM_clean	3	3	3	0.169618	16.45	4	34		71.92	48.09	98.79	5.68	-1.7	13.59	18.2092	7.10984	2.56112	11.8413	0.592075	0	0	0.783	1.32247	0	Zn
7	MUBZOA_auto	7.85	6	8	0.294372	24.27	11	42		49.25	24.09	70.79	5.97	-2.2	12.89	18.7272	7.12	2.63022	18.7272	0.441638	0	0	0.8132	1.84133	0.00045286	Zr
8	ALEJEI_clean	2	2	2	0.113834	215.91	157	237		76.47	52.29	95.69	16.84	0.09	57.49	18.0651	7.13825	2.53074	11.2956	0.600782	0	0	0.783	1.3033	0	Cu
12	CIRTUU_clean	1.78	1	2	0.0951615	210.07	150	237		60.03	13.49	77.29	16.88	-0.7	55.19	15.602	7.15132	2.1817	15.602	0.583758	0	0	0.7788	1.33412	0	Cu
11	WAHKUO_clean	2.08	1	3	0.0621422	32.21	13	50		68.72	31.29	87.29	6.32	-0.9	15.29	16.2089	7.16155	2.26332	16.2089	0.580972	0	0	0.759	1.30643	0	Cu,Ti
11	WAHNOL_clean	0.91	0	1	0.0326705	84.51	33	118		71.91	27.99	82.49	14.26	-1.4	39.39	16.1552	7.17077	2.25293	16.1552	0.498613	0	0	0.7774	1.55913	0	Cu
23	ja406030p_si_006_manual	0.37	0	1	0.0170654	8.91	0	24		63.53	21.39	79.09	4.8	-2.2	12.29	12.3608	7.19983	1.71681	11.8404	0.687816	0	0	0.751	1.09186	0	Zn,Cr
18	MEJMOE_clean	0.59	0	2	0.0838314	3.57	0	21		71.23	17.59	92.89	5.49	-1.5	12.49	13.3608	7.20564	1.85422	12.3816	0.61631	0	0	0.8056	1.30713	0	Zn
22	ASINEX_clean	0.52	0	1	0.0173115	17.49	5	35		62.57	12.19	77.79	4.78	-1.6	11.29	12.5357	7.27061	1.72416	12.4788	0.659976	0	0	0.7014	1.06277	0	Zn
6	HULCOI_clean	2	2	2	0.109943	151.83	104	174		54.11	38.19	72.19	13.38	-1.3	56.09	19.4866	7.36184	2.64697	19.2406	0.593799	0	0	0.7806	1.31459	0	Cu
19	FOSTUE_clean	2.32	0	3	0.0811021	14.25	0	30		55.98	23.79	90.69	4.53	-2.3	12.39	13.0957	7.43748	1.76077	13.0957	0.582855	0	0	0.7556	1.29638	0	In
13	AQOLID_clean	0.61	0	1	0.0286291	66.67	46	90		95.29	61.69	107.69	7.99	-0.5	14.79	15.4614	7.44821	2.07586	15.4035	1.15975	396.899	342.228	0.6494	0.559948	0	Co
5	ZIJSAO_clean	4.01	3	5	0.271276	18.24	5	33		67.53	27.49	97.29	7.45	-3.1	16.29	20.3296	7.50871	2.70747	20.3296	0.465536	0	0	0.8128	1.74594	0	Tb
8	PEWLUA_clean	1	1	1	0.10727	115.29	96	135		71.82	54.89	87.59	16.47	-0.4	54.79	17.7712	7.51947	2.36336	12.4594	0.588936	0	0	0.7974	1.35397	0	Cu
11	GULWEQ_clean	4.23	2	5	0.116279	24.65	10	43		53.34	15.49	73.49	5.29	-2.6	12.49	15.981	7.52003	2.12513	15.9748	0.734572	252.635	343.921	0.7614	1.03652	0	Cd
3	IZEPAF_clean	2	2	2	0.18689	5.53	0	16		50.14	32.69	69.79	5.42	-1.4	13.19	24.1004	7.53546	3.19827	24.1004	0.570649	0	0	0.7816	1.36967	0	Cr
19	CAJQIP_clean	1.6	1	2	0.113408	143.2	105	160		75.87	40.19	101.09	16.65	-1	50.29	13.2774	7.61293	1.74406	13.2774	0.545408	0	0	0.787	1.44296	0	Cu
4	ja5b00365_si_002_clean	3.83	3	4	0.369602	13.36	4	29		65.65	26.89	102.39	6.11	-1.3	13.39	21.7763	7.63115	2.8536	21.7763	0.452533	0	0	0.826	1.82528	0	Zn
5	GUPDEB_clean	2	2	2	0.104312	49.96	35	67		60.98	39.09	82.89	7.82	-1.1	15.59	20.6868	7.65386	2.7028	20.6868	0.945467	1.11326	1.17747	0.7196	0.761105	0	Cd
4	OMIPEH_clean	3	3	3	0.0691727	628.49	388	730		78.76	46.69	104.19	14.37	-1.8	47.29	21.7314	7.72557	2.81291	21.6993	0.65885	0	0	0.8104	1.23002	0	Cu	WAFKEU05	WAFKEU06	WAFKEU07	WAFKEU08	WARFAY02	WARFAY03	WARFAY04	WARFAY05	WARFAY06
5	IYOWID_manual	2.03	2	3	0.268583	6.7	0	19		50.54	33.29	81.79	5.73	-2.1	13.09	20.5167	7.7477	2.6481	20.5167	0.405068	0	0	0.822	2.02929	0	Zn
5	CAVPIA_manual	2	2	2	0.264543	31.94	19	46		54.01	36.49	73.69	9.44	-1.6	17.89	19.9203	7.75151	2.56987	19.8663	0.416148	0	0	0.8146	1.95748	0	Cu
7	BOLZIN_clean	4.97	4	5	0.354	14.23	5	28		60.22	25.39	88.59	6.06	-1	13.19	18.7125	7.75585	2.41269	17.499	0.466942	0	0	0.8076	1.72955	0	Zr
5	CAVPEW_manual	2	2	2	0.284725	5.54	0	20		51.22	30.09	83.79	5.75	-1.2	14.79	20.2591	7.7782	2.6046	20.2591	0.40269	0	0	0.8198	2.03581	0	Co
18	EXOTOB_clean	1	1	1	0.104631	6.6	1	17		66.3	52.09	83.49	5.67	-1.2	12.89	13.2874	7.77882	1.70815	13.2225	0.710367	0	0	0.7024	0.988785	0	Ni
5	CAVPUM_manual	2.8	2	3	0.388828	8.74	0	22		62.42	23.79	89.39	6.12	-2.6	13.09	20.4281	7.78019	2.62566	20.4281	0.407456	0	0	0.8202	2.01298	0	Zn
4	OMITUB_clean	3	3	3	0.0691727	625.77	369	722		71.55	36.09	96.89	14.57	-1.2	47.39	21.9666	7.7864	2.82114	21.9556	0.652675	0	0	0.8126	1.24503	0	Cu
7	MAHCIK_clean	2	2	2	0.133515	9.13	1	21		50.1	32.09	68.89	5.12	-2.2	12.79	18.7773	7.81499	2.40273	18.7773	0.539574	0	0	0.8044	1.49081	0	Zn
13	jacs.6b06759_ja6b06759_si_004_clean	0.7	0	2	0.0216646	7.77	0	22		56.83	20.49	75.09	3.62	-3	10.39	15.4905	7.85668	1.97163	15.4848	0.558595	0	0	0.7746	1.38669	0.000358041	Zr
9	ZICCIZ_clean	1.87	0	3	0.0369192	13.77	0	30		55.85	3.39	73.49	4.2	-1.4	11.89	17.0822	7.88152	2.16738	11.6366	0.729494	0	0	0.7876	1.07965	0	Cd,Co
8	VEJHID_clean	1.69	0	5	0.0344188	21.34	2	41		53	0.59	74.29	4.45	-2.4	11.99	17.6534	7.8833	2.23934	11.5892	0.646039	0	0	0.7972	1.23398	0	Cd
5	ICAQOU_clean	2	2	2	0.266387	29.71	15	42		52.43	32.89	73.69	9.53	-1.9	18.09	20.2997	7.90669	2.5674	20.2948	0.413296	0	0	0.824	1.99373	0	Cu
7	MUBZUG_auto	8.71	6	9	0.315792	29.84	17	45		55.45	18.09	89.99	6.08	-1.3	12.19	18.6354	7.90997	2.35594	18.6354	0.469492	0	0	0.8032	1.71078	0.000425992	Zr
6	WAVROC_clean	2	2	2	0.198256	13.255	4	25		52.11	37.99	73.19	7.07	-2.2	15.39	18.8852	7.91531	2.38591	18.8852	0.52911	0	0	0.7926	1.49799	0	Mg,In
5	ICAROV_clean	2	2	2	0.271177	6.89	1	19		58.51	39.49	82.49	6.28	-1.2	14.09	20.3334	7.92146	2.56687	20.3157	0.406521	0	0	0.8236	2.02597	0	Ni
13	cg901312t_si_002_clean	3.08	1	5	0.108592	19.7	2	37		58.06	7.49	80.09	5.21	-2	12.29	15.5483	7.92817	1.96115	14.8518	0.630454	0	0	0.764	1.21183	0	Zn
14	LAWGUM_clean	2.42	0	3	0.171925	8.23	0	20		58.17	16.39	81.39	5.25	-1.2	12.39	15.0997	7.93483	1.90297	15.0979	0.58881	0	0	0.8032	1.36411	0	Zn
14	NEXVET_clean	0.56	0	2	0.0824253	2.21	0	13		57.08	16.79	76.99	4.42	-1.8	11.69	15.0513	7.94511	1.89441	15.023	0.572296	0	0	0.8096	1.41465	0	Ni
14	LAWFOF_clean	1.05	1	2	0.149191	4.41	0	17		59.41	34.09	80.99	5.3	-1.2	11.29	15.1012	7.95608	1.89807	15.1012	0.589497	0	0	0.8124	1.37812	0	Zn
5	ICAQIO_clean	2	2	3	0.270952	5.89	0	19		52.58	2.59	71.59	5.45	-2.1	12.39	20.3911	7.95732	2.56256	20.3911	0.40349	0	0	0.8268	2.04912	0	Co
7	MAHCOQ_clean	2.74	2	3	0.1851	11.53	0	25		55.35	3.59	84.39	5.48	-1.6	12.29	18.8394	7.96401	2.36556	18.8394	0.527426	0	0	0.8002	1.51718	0	Zn,Co
7	MAHCEG_clean	2.08	2	3	0.139324	68.96	49	84		58.72	31.09	75.59	15.14	-1.1	53.39	18.5184	7.97271	2.32273	18.5184	0.531149	0	0	0.8144	1.53328	0	Cu,Zn
13	jacs.6b06759_ja6b06759_si_003_clean	0.33	0	1	0.00852864	11.27	2	24		58.1	39.89	70.19	4.89	-3	12.09	15.3841	7.99425	1.92439	15.3786	0.667947	0	0	0.7722	1.15608	0.000299425	Hf
23	XAKZIT_clean	0.52	0	1	0.0154143	17.81	6	31		61.77	29.39	76.29	5.2	-2.2	11.29	12.2322	8.02038	1.52514	12.2322	0.853098	0	0	0.6458	0.757006	0	Mn
12	acs.inorgchem.6b01740_ic6b01740_si_002_clean	1.32	1	1	0.271388	9.46	1	25		68.87	19.99	105.09	6.79	-1.5	14.59	15.6805	8.0633	1.94468	15.6805	0.473321	0	0	0.7938	1.67709	0	Co
15	acs.jpcc.6b08594_Zn2Cd6MOF5_opt_clean	3.41	1	4	0.131593	10.94	1	26		55.34	0.89	75.09	5.06	-2.8	12.89	14.7021	8.11021	1.81279	14.7021	0.628556	0	0	0.8094	1.28771	0	Cd,Zn
14	jacs.6b06759_ja6b06759_si_002_clean	0.58	0	1	0.0179506	8.41	0	24		53.14	9.89	66.59	3.87	-1.7	11.49	14.8109	8.19624	1.80704	14.8109	0.576281	0	0	0.7704	1.33685	0.000347053	Zr
13	LAPZIO_clean	1	1	1	0.234911	42.38	34	53		69.06	55.29	86.89	15.6	-1.1	47.49	15.3044	8.24294	1.85666	15.3044	0.552463	0	0	0.7882	1.4267	0	Cu
24	EKUPEG_clean	0.81	0	1	0.0817934	14.24	4	31		63.48	8.49	89.89	7.07	-6.8	14.09	12.1508	8.26476	1.47019	12.1507	0.865202	0	0	0.685	0.791723	0	Cu
21	TOVJIZ_clean	7.39	5	8	0.372058	28.52	10	47		51.1	2.49	73.49	5.96	-1.9	13.09	12.651	8.2906	1.52595	12.6394	0.451159	0	0	0.8026	1.77897	0	Fe
22	TOVJOF_clean	3.81	2	4	0.356361	15.85	5	34		54.45	28.89	78.79	6.1	-1.6	13.69	12.425	8.36781	1.48486	12.422	0.470537	0	0	0.8052	1.71124	0	Fe
14	PUZLUS_clean	2	2	2	0.224322	11.06	1	24		66.19	47.29	96.79	5.74	-2.3	12.99	15.0914	8.39804	1.79702	15.0874	0.46153	0	0	0.8014	1.7364	0	Co
8	ja512973b_si_002_auto	7.51	2	8	0.207183	25.46	5	44		40.11	2.89	61.79	5.25	-3.4	11.89	17.7505	8.47189	2.09522	17.7501	0.458587	0	0	0.7852	1.71222	0.000436122	Zr
17	YURJUR_clean	2.84	0	4	0.139067	60.79	37	88		69.97	5.49	95.59	7.08	-3.5	14.49	13.6925	8.47609	1.61543	13.6925	0.683521	0	0	0.7552	1.10487	0	Ce
19	BINDAF_manual	1.66	0	2	0.0421094	21.13	6	42		57.78	3.89	73.29	4.75	-1.7	12.89	13.1432	8.49712	1.54678	13.1432	0.600599	0	0	0.7212	1.2008	0	Ni
23	TOVJAR_clean	5.25	2	7	0.225892	25.98	9	46		58.22	4.79	79.09	7.1	-1.4	16.89	12.4053	8.52361	1.4554	12.2858	0.516295	0	0	0.809	1.56693	0	Fe,Co
5	BAZFUF01_clean	2	2	2	0.349456	49.61	38	63		80.91	45.79	115.69	15.64	-1.1	49.09	20.1456	8.54605	2.35731	20.1456	0.342062	0	0	0.863	2.52293	0	Cu
7	PODKOK_clean	1.98	1	3	0.182473	113.51	83	131		65.27	10.09	85.89	16.08	-1.1	53.29	18.5189	8.56409	2.16238	12.5973	0.489414	0	0	0.8128	1.66076	0	Cu
4	ja512973b_si_003_auto	2.15	2	3	0.475987	6.12	0	19		57.53	29.59	83.69	6.38	-0.6	13.89	21.3381	8.58252	2.48623	20.9252	0.403686	0	0	0.8204	2.03227	0.000495434	Zr
5	BAZFUF_clean	3	3	3	0.524184	52.85	38	69		71.9	44.89	106.89	16.22	-0.9	49.69	20.246	8.58384	2.35861	20.246	0.340053	0	0	0.8648	2.54313	0	Cu
6	DITJOH_clean	5.5	3	6	0.456849	24.93	11	43		58.05	5.39	89.49	7.33	-8.8	15.79	19.431	8.59079	2.26184	19.4014	0.448746	0	0	0.824	1.83623	0.000445686	Zr
18	FAGQAI_clean	1.08	1	2	0.0979927	97.54	70	117		90.8	16.09	111.59	17.33	-1.2	56.19	13.612	8.61498	1.58004	13.6012	0.481098	0	0	0.7864	1.63459	0	Cu
17	GUPCAW_clean	1.16	0	2	0.029862	9.14	0	23		56.68	2.59	73.19	4.29	-2	10.69	13.6467	8.62891	1.58151	13.5764	0.814725	0.829839	1.01855	0.7426	0.911474	0	Cd
21	AGOFEJ_clean	0.52	0	1	0.0264422	110.88	87	133		66.06	28.59	83.49	18.58	-0.7	50.19	12.6138	8.71559	1.44727	12.598	0.583675	0	0	0.767	1.31409	0	Cu
22	ja406030p_si_004_clean	2.88	0	4	0.138079	15.51	1	36		61.41	20.19	81.79	5.76	-2.7	13.39	12.4757	8.72571	1.42976	12.4757	0.678618	0	0	0.7566	1.11491	0	Zn,Cr
4	ja5111317_ja5111317_si_002_auto	2	2	2	0.424513	5.54	1	14		52.5	37.39	75.29	6.4	-1.2	14.79	21.3794	8.74134	2.44578	21.3794	0.420413	0	0	0.8218	1.95474	0.000475722	Ni,Zr
3	QIYDAF_clean	6	6	6	0.470074	109.64	85	125		69.1	33.29	93.39	15.79	-0.5	51.89	22.9797	8.76388	2.62209	22.9797	0.403152	0	0	0.8334	2.06721	0	Cu
18	ic101935f_si_002_auto	2.82	2	3	0.495797	7.7	0	20		51.73	13.19	81.09	5.7	-2.7	12.19	13.5278	8.78691	1.53954	13.5143	0.408029	0	0	0.8498	2.08269	0	Zn
20	YUZCON_clean	4.49	4	6	0.0827209	163.62	101	200		58.18	9.39	78.59	8.69	-1	15.39	12.8548	8.91717	1.44158	12.8355	1.23622	0	0	0.7372	0.596334	0	Mo,Zn
4	ja809985t_si_002_clean	13.8	12	14	0.610107	43.1	24	69		59.77	29.94	97.79	6.17	-2.2	14.29	22.7784	8.92569	2.552	22.4188	0.406231	0	0	0.8602	2.11751	0	Zn
4	PODKUQ_clean	3.57	3	4	0.312902	109.82	82	130		67.81	37.79	93.89	16.52	-0.6	55.59	22.3186	8.92625	2.50033	14.1829	0.425765	0	0	0.8332	1.95695	0	Cu
5	GAQYIH_clean	3	3	3	0.212494	5.23	0	16		41.39	27.29	63.09	5.24	-1.4	11.69	20.2584	8.96976	2.25853	15.7736	0.559917	0	0	0.8486	1.51558	0	Cd
2	VEGCAN_clean	3.97	3	4	0.248709	55.23	38	72		56.73	28.39	87.29	9.71	-0.5	19.19	26.2316	8.97115	2.924	26.2316	0.749461	0	0	0.8278	1.10453	0.000266859	Hf
12	ACUFEK_clean	0.71	0	1	0.0727624	2.42	0	11		44.06	17.39	66.69	3.77	-2.4	10.59	15.5563	9.00897	1.72675	15.5563	0.559431	0	0	0.787	1.40679	0	Cu
5	DITJIB_clean	9.09	8	10	0.315706	37.16	17	59		52.25	13.19	95.49	6.93	-0.7	15.39	20.3631	9.01147	2.25969	20.3631	0.521418	0	0	0.8332	1.59795	0	Hf
3	HABRAF_manual	5.1	5	6	0.52859	89.44	72	104		65.95	13.49	88.79	17.48	-0.6	53.79	24.3095	9.03515	2.69055	24.3095	0.38234	0	0	0.8462	2.21321	0	Cu
22	MATXAJ_clean	1.45	0	3	0.113266	12.05	1	31		75.59	30.79	91.39	5.84	-1.8	13.39	12.5	9.04853	1.38144	12.4063	0.6224	0	0	0.775	1.24518	0	Zn
2	VEGBUG_clean	4.01	4	5	0.32411	52.8	38	71		56.96	24.29	86.59	9.96	-1.1	19.29	26.2956	9.06734	2.90003	26.2956	0.576598	0	0	0.8298	1.43913	0.000346862	Zr
4	MEHMET_clean	2.94	2	3	0.25116	96.28	77	111		57.8	19.99	77.19	17.2	-1.1	51.09	21.8234	9.06966	2.4062	13.9406	0.408796	0	0	0.8328	2.0372	0	Cu
24	HUQHUY_clean	2.43	1	3	0.0813548	24.21	4	42		66.02	13.09	85.39	5.61	-0.9	12.59	12.117	9.08074	1.33436	12.1141	0.619951	0	0	0.7208	1.16267	0	Zn
3	LEHXUT_clean	4	4	4	0.292932	113.35	93	133		55.99	32.79	85.19	16.77	-0.9	55.49	24.9488	9.11981	2.73567	13.9633	0.407171	0	0	0.8288	2.03551	0	Cu
18	BAWROI_clean	1.73	1	2	0.146054	11.42	3	28		69.15	23.99	88.29	6.96	-2	14.49	13.5498	9.13066	1.48399	13.5489	0.629882	0	0	0.7794	1.23737	0	Zn
10	QAGQEW_clean	1	1	1	0.100545	22.59	12	38		81.11	58.79	99.29	7.55	-1.4	15.89	16.4829	9.14033	1.80332	16.4829	0.959417	398.029	414.866	0.701	0.730652	0	Cd
8	ja507947d_si_001_auto	3.94	2	4	0.33446	13.38	4	28		51.02	17.69	72.39	6.13	-2.2	13.99	17.5271	9.15991	1.91346	17.5128	0.493165	0	0	0.8062	1.63475	0.000405544	Zr
7	XALTIP_clean	7.6	6	8	0.315017	38.32	15	58		59.49	23.69	85.99	6.43	-1.5	13.49	18.683	9.17237	2.03688	18.683	0.551216	0	0	0.7988	1.44916	0	Zn,Co
14	HUMWIX_clean	2.2	1	3	0.0434273	163.22	97	198		62.02	4.09	77.39	20.21	-1.1	56.89	14.9857	9.18322	1.63185	14.9857	0.727734	168.676	231.782	0.6626	0.910497	0	Cu,Mn
4	YUZPEQ_clean	5.51	3	6	0.250798	31.57	15	53		55.94	11.69	80.39	5.97	-1.9	12.99	21.4982	9.22584	2.33021	18.3405	0.4666	0	0	0.8266	1.77154	0	Zn
7	AWUPAL_clean	13.26	11	15	0.692328	36.56	16	62		57.6	18.59	87.79	6.34	-1.4	14.19	18.4206	9.23563	1.99452	18.4206	0.348553	0	0	0.8538	2.44956	0	In,Fe
10	PUZMAZ_manual	9.1	5	11	0.280465	45.53	23	69		53.04	9.99	78.59	5.83	-2.7	13.69	16.4214	9.23775	1.77764	16.4093	0.447552	0	0	0.7972	1.78124	0	Co
10	LELDUD_clean	3.72	2	5	0.191692	204.31	149	244		63.86	8.99	88.39	16.25	-9.5	50.39	16.5482	9.24625	1.78972	16.5482	0.458126	0	0	0.829	1.80955	0	Cu
21	OTALUS_clean	3.21	3	4	0.215309	21.68	10	35		59.54	28.09	82.09	6.52	-2.3	13.59	12.677	9.31362	1.36113	12.677	0.655199	0	0	0.7266	1.10898	0	Zn
10	RANWAH_clean	0.71	0	1	0.0848304	39.14	27	55		77.18	24.79	94.79	10.64	-0.8	20.79	16.7453	9.32901	1.79497	16.7265	0.807635	378.27	468.367	0.6974	0.863509	0	Mn
17	TOZFOF_clean	1	1	1	0.0279206	4.2	0	17		40.37	28.79	58.49	3.67	-2.4	11.69	13.7728	9.32974	1.47623	13.7728	0.843356	0	0	0.7158	0.848752	0	Ru,Co
22	EJETAQ_clean	3.26	2	4	0.20605	79.58	44	110		69.34	30.49	90.99	10.27	-0.9	26.09	12.5335	9.36877	1.33779	12.5335	0.673241	0	0	0.7674	1.13986	0	Na,Eu
7	LIKDOA_clean	1	1	1	0.0625509	200.55	146	228		114.56	97.79	126.79	15.84	-0.7	48.49	18.4832	9.41931	1.96227	18.4832	0.536397	0	0	0.8154	1.52014	0	Cu
20	JOGSAA_clean	4.63	2	6	0.376843	14.6	2	33		58.9	3.99	79.09	5.83	-1.2	12.79	12.9763	9.4474	1.37353	12.8676	0.420776	0	0	0.8226	1.95496	0	Ni
11	FALBAX_manual	8.25	3	10	0.254268	47	12	74		57.57	5.69	91.29	5.86	-0.8	14.39	16.1525	9.49143	1.7018	16.1486	0.447193	0	0	0.8038	1.79743	0	Co
24	SEWCED_clean	0.79	0	1	0.0173056	139.08	97	171		73.08	5.59	90.99	7.88	-1.1	14.09	12.1554	9.5104	1.27811	12.1737	0.810307	0	0	0.6728	0.830303	0	Cd
4	BINSAU_clean	4.68	4	5	0.383186	19.45	5	39		65.06	3.09	96.49	6.19	-1.5	13.09	21.8801	9.52705	2.29663	21.0552	0.471575	0	0	0.7874	1.66972	0	Mn
16	OKABAE_clean	1	1	1	0.0479129	272.83	204	310		97.06	75.59	110.09	17.17	0.19	49.29	14.0742	9.53484	1.47608	14.0742	0.650845	0	0	0.77	1.18308	0	Cu
15	UTEWOG_clean	2.81	0	4	0.0947825	32.43	11	60		66.56	9.59	88.49	6.31	-1.7	14.79	14.5915	9.55269	1.52747	14.5915	0.752086	424.373	564.261	0.7204	0.957869	0	Ni
12	MUWQEB_clean	2.45	1	3	0.0827445	45.31	19	65		60.61	14.69	80.89	7.72	-1.1	15.29	15.6648	9.57746	1.63559	15.5128	0.72296	458.981	634.865	0.7258	1.00393	0	Fe
20	ic800131r-file003_clean	4.86	4	6	0.394119	16.51	5	35		67.23	13.19	92.19	6.14	-1.5	15.09	12.9498	9.58722	1.35074	12.949	0.417413	0	0	0.8202	1.96496	0	Co
20	HAVZIP_clean	5.63	1	7	0.456562	19.91	0	39		61.31	12.09	93.19	9.2	-1.7	13.89	12.9546	9.6087	1.34821	12.7663	0.416845	0	0	0.815	1.95516	0	Co
17	RAYMOV_clean	4.42	3	6	0.357615	13.94	4	31		62.68	10.79	91.79	6.02	-1.7	12.79	13.9046	9.65699	1.43984	13.6751	0.424006	0	0	0.8122	1.91554	0	Mn
13	BETGUE_clean	4.77	2	5	0.158382	24.22	10	39		63.28	17.89	82.19	6.67	-1.1	15.79	15.5313	9.65919	1.60794	15.5313	0.735216	466.651	634.712	0.7352	0.999978	0	Co
23	c5cc04223b_c5cc04223b2_clean	1.5	1	2	0.078328	15.6	4	35		60.96	21.39	77.19	5.66	-1.8	12.69	12.297	9.67035	1.27162	12.2571	0.522428	0	0	0.794	1.51983	0	Zn
12	AQOMEA01_clean	1	1	1	0.135205	6.75	0	17		66.54	47.89	86.39	6.03	-1.7	12.99	15.7195	9.72839	1.61584	15.7195	0.76692	425.267	554.513	0.7184	0.936734	0	Co
16	KADLUZ_clean	2.97	2	3	0.110667	119.31	76	146		72.74	38.29	92.29	10.62	-1.3	25.19	14.2798	9.75466	1.46389	14.2789	0.875377	0	0	0.6958	0.794857	0	Cu
18	RAYMIP_clean	0.19	0	1	0.0135696	30.47	20	45		64.68	20.09	75.99	7.93	-1.4	14.99	13.4742	9.8037	1.3744	13.4678	0.502799	0	0	0.8088	1.6086	0	In
12	AQOLEZ_clean	3.78	1	5	0.119146	40.05	13	63		71.92	25.19	93.99	6.39	-1.1	13.09	15.5687	9.80847	1.58728	15.5687	0.777237	443.796	570.991	0.7198	0.926101	0	Co
19	MIXZOK_clean	2.97	1	4	0.238304	10.53	0	24		62.84	23.59	83.49	5.71	-3.6	13.09	13.1878	9.81049	1.34426	13.1794	0.452893	0	0	0.8114	1.79159	0	Ni
12	GAGQAI_clean	3.96	3	4	0.12454	54.26	27	77		61.88	36.99	81.99	8.58	-0.9	16.69	15.6839	9.81587	1.59781	15.6421	0.743275	458.409	616.743	0.721	0.970032	0	Fe
9	VEBHUG_SL	8.22	7	9	0.4411	29.6	10	51		59.66	11.29	90.69	6.23	-2.5	13.89	17.3025	9.82354	1.76133	17.3025	0.511068	0	0	0.8468	1.65692	0	Zn
16	YORLEY_clean	2.78	1	3	0.0384314	15.76	6	30		51.83	20.49	70.29	5.4	-1.1	10.69	14.114	9.82464	1.4366	14.114	1.50654	0	0	0.6006	0.398661	0	Ag,Au
12	AQOMEA_clean	1	1	1	0.135205	9.25	1	22		71.53	52.29	93.79	7.02	-2.1	15.19	15.8352	9.82464	1.61179	15.8304	0.749306	431.482	575.842	0.7222	0.963826	0	Co
14	IYUQID_clean	1	1	1	0.0772345	72.39	49	93		85.22	60.39	103.09	12.12	-1.1	25.99	15.0918	9.842	1.5334	15.0491	0.561619	286.013	509.264	0.7206	1.28308	0	Na
21	ILITUT_manual	1.97	1	2	0.187585	6.13	0	17		57.46	8.89	76.59	5.06	-1.4	11.39	12.6337	9.84913	1.28272	12.6312	0.49196	0	0	0.786	1.59769	0	Co
20	HUFKUQ_clean	1.51	0	2	0.101936	10.27	0	26		50.13	32.29	71.09	5.06	-1	11.39	12.9492	9.87431	1.3114	12.9492	0.591794	0	0	0.7696	1.30045	0	Cd
11	OLICIX_clean	1	1	1	0.13677	16.83	6	31		69.7	50.39	87.99	7.71	-0.6	14.49	16.1602	9.89287	1.63352	16.1333	0.719139	424.686	590.547	0.722	1.00398	0	Fe
17	BICPUA_clean	3.45	2	4	0.221174	15.88	2	30		66.16	8.99	90.69	6.51	-1	15.49	13.7968	9.90606	1.39276	13.2909	0.543859	0	0	0.815	1.49855	0	Yb
5	cg500175k_si_001_auto	1.71	1	2	0.0902177	260.9	197	293		77.44	17.39	102.89	16.22	-10.8	53.99	20.3771	9.90922	2.05638	20.3771	0.51525	0	0	0.821	1.5934	0	Cu
22	ICODIP_clean	0.82	0	1	0.063124	21.05	6	35		72.17	48.29	91.19	6.95	-1.8	14.19	12.5506	9.93166	1.2637	12.1307	0.813948	0	0	0.685	0.841577	0	Zn
21	ICODIP01_clean	1.56	0	2	0.120089	24.02	6	39		69.26	31.89	95.49	7.07	-4.3	15.09	12.6239	9.97272	1.26584	12.611	0.806244	0	0	0.686	0.850859	0	Zn
8	ja808995d_si_002_clean	2	2	2	0.135318	22.77	13	34		60.03	36.79	77.99	7.17	-1.3	14.49	17.6314	10.0389	1.75631	17.6233	0.751788	192.928	256.625	0.6832	0.908766	0	Cd
4	BINRUN_clean	3.84	3	4	0.268667	17.28	5	32		58.57	27.09	84.99	5.87	-1.4	13.69	21.1029	10.0936	2.09071	21.0922	0.511736	0	0	0.7778	1.51992	0	Zn
14	SUNLET_clean	2	2	2	0.231283	63.07	50	78		69.94	37.79	91.09	18.47	-0.8	53.99	14.8752	10.1053	1.47201	14.8607	0.621573	0	0	0.734	1.18088	0	Cu
15	ja406030p_si_003_clean	5.8	3	6	0.285615	51.65	35	66		57.73	13.19	87.29	7.68	-0.6	14.09	14.2921	10.1282	1.41111	14.2921	0.648977	0	0	0.775	1.19419	0	Zn,Cr
8	OPIFUQ_clean	1	1	1	0.0235139	335.42	210	391		82.82	49.19	110.59	11.35	-0.7	23.69	17.9991	10.1349	1.77594	17.9909	0.790446	384.276	486.151	0.722	0.913408	0	Sr
22	FAYQED_clean	2.9	2	3	0.314596	11.85	2	26		60.18	11.39	87.69	5.98	-1.1	13.69	12.559	10.1499	1.23735	12.5356	0.533674	0	0	0.7818	1.46494	0	Zn
8	jacs.6b04608_ja6b04608_si_003_clean	2.13	2	3	0.0490225	18.89	8	32		57.55	35.19	83.79	6.87	-0.7	12.69	17.7455	10.1837	1.74255	17.6173	0.472151	0	0	0.8228	1.74266	0.000423593	Zr
15	ANUGEW_clean	1.55	1	2	0.18327	103.25	81	126		69.16	18.59	92.79	16.43	-1.7	51.89	14.4419	10.2051	1.41516	14.4419	0.443469	0	0	0.8326	1.87747	0	Cu
4	BINROH_clean	3.83	3	4	0.269866	121.43	97	139		69.05	25.19	94.49	15.35	-1.3	49.59	21.3137	10.2369	2.08205	21.3137	0.503862	0	0	0.7964	1.58059	0	Cu
3	YUZPIU_clean	7.65	6	10	0.332675	33.77	16	75		59.47	26.09	99.19	5.87	-2.4	14.39	24.2826	10.2733	2.36367	24.2764	0.405541	0	0	0.8426	2.07772	0	Zn
2	ADATAC_clean	8.48	7	9	0.797625	26.45	7	45		57.73	15.19	85.59	6.42	-2.1	13.59	26.3351	10.2764	2.56269	16.3709	0.33727	0	0	0.871	2.5825	0	Zn
17	TOVJEV_clean	6.03	5	7	0.608277	13.72	4	28		59.1	32.39	84.29	5.89	-2.2	12.79	13.6809	10.3707	1.31919	13.6809	0.399582	0	0	0.837	2.09469	0	Fe
8	FORTUD_clean	2.87	2	3	0.155096	29.76	18	44		60.05	25.69	86.09	6.84	-1.3	13.69	17.4656	10.3818	1.68233	17.4652	0.786041	116.509	148.223	0.691	0.879089	0	Zn
4	PELRIJ_clean	3.05	3	4	0.252827	128.7	99	144		68.45	23.79	86.99	15	-0.1	50.49	21.5575	10.3834	2.07614	21.5429	0.51708	0	0	0.8016	1.55024	0	Cu
11	POHWIU_clean	6.39	4	8	0.324393	21.07	9	37		62.36	25.49	86.69	5.83	-2.6	12.19	15.9497	10.3936	1.53456	15.9487	0.460887	0	0	0.8104	1.75835	0	Co
8	BOXFOK_clean	3	3	3	0.182007	48.5	31	60		66.18	42.19	91.59	12.67	-1.3	23.49	18.0621	10.4233	1.73286	18.0621	0.790526	197.917	250.36	0.69	0.872836	0	Dy
4	QIYDIN01_clean	9.71	8	12	0.440513	208.95	143	246		59.68	23.99	116.29	16.36	-1.5	50.69	21.6014	10.4566	2.06583	21.5311	0.395741	0	0	0.8328	2.10441	0	Cu
13	KARNAU_clean	2.19	2	3	0.34914	7.75	1	19		58.87	32.89	87.89	5.96	-1.6	12.09	15.5323	10.4817	1.48185	15.5323	0.459782	0	0	0.8028	1.74604	0	Ni
14	FATKIV_clean	5.71	3	6	0.110318	29.9	11	50		55.58	24.09	78.59	5.86	-1.1	12.99	14.8417	10.4851	1.41551	14.1311	0.799535	197.216	246.664	0.6364	0.795963	0	Mn
3	ja512973b_si_005_auto	32.34	27	35	0.834137	66.37	32	99		51.69	6.29	88.09	5.93	-1.5	12.19	25.2415	10.4959	2.4049	25.2415	0.291153	0	0	0.8684	2.98262	0.000686924	Zr
11	BETHIT_clean	3.97	2	5	0.102013	12.22	2	29		57.36	13.29	77.09	5.16	-1.9	12.29	16.1767	10.5086	1.53937	16.1767	0.819587	480.797	586.633	0.7656	0.934129	0	Cd
6	IZOWAW_clean	8.59	8	8	0.151097	220.79	141	268		51.51	17.69	90.49	9.43	-2.9	19.39	18.9473	10.5132	1.80223	18.9368	1.00603	0.0981256	0.0975376	0.7888	0.784073	0	Mo,Zn
20	OLOGEC_clean	3.82	2	4	0.370697	18.83	6	35		55.97	27.39	85.89	6.7	-0.6	15.09	13.0404	10.5352	1.2378	13.0319	0.526318	0	0	0.8106	1.54013	0	Zn
15	OGEBAF01_clean	3.82	3	4	0.173004	244.88	169	280		63.96	18.89	82.49	17.49	-0.4	50.59	14.7455	10.548	1.39794	14.7455	0.504959	0	0	0.8166	1.61716	0	Cu
9	GISNED_clean	2	2	2	0.365745	7.89	0	22		52.19	34.59	80.99	6.31	-2.4	12.99	16.8839	10.6099	1.59134	16.8839	0.446812	0	0	0.8226	1.84104	0	Zn
5	EDUVOO_clean	13.85	11	15	0.663151	38.37	18	59		54.8	21.59	90.09	6.07	-2.2	12.99	20.9341	10.6286	1.9696	20.9324	0.373403	0	0	0.862	2.3085	0	Zn
24	VANNIK_clean	5.07	3	6	0.453205	49.65	31	67		62.02	14.49	83.89	11.93	-0.8	23.59	12.1173	10.7008	1.13238	12.1173	0.488133	0	0	0.8496	1.74051	0	U
19	XUKYEI_neutral	9.08	7	10	0.935277	30.32	13	52		55.78	32.29	82.69	6.45	-2.1	14.19	13.1723	10.7585	1.22437	13.1684	0.287208	0	0	0.8682	3.02289	0	Cu
21	ZOFZUR_clean	3.45	1	4	0.151037	57.47	44	79		59.63	34.19	82.59	9.17	-1.9	17.09	12.7273	10.7592	1.18291	12.7273	0.565447	0	0	0.7702	1.36211	0	Mn
3	AVILEY_clean	9.67	8	10	0.329791	67.37	31	91		63.8	1.89	98.69	7.57	-1.1	18.19	25.427	10.7684	2.36125	22.5789	0.654082	0	0	0.8422	1.28761	0	Ir,Hf
15	POTREX_clean	4.71	3	5	0.307185	16.32	3	34		61.63	22.79	83.99	5.5	-10.7	13.19	14.7001	10.7986	1.36129	14.7001	0.483438	0	0	0.7802	1.61386	0	Co
22	AGABIU_clean	1.76	1	2	0.107367	151.26	84	179		67.96	15.99	96.79	11.5	-0.7	20.39	12.571	10.8274	1.16103	12.571	0.647122	2.83534	4.38145	0.7402	1.14383	0	Ni,Li
6	MILROQ_clean	4	4	4	0.21067	161.75	106	192		81.77	55.69	113.19	15.75	-2.4	47.49	19.7171	10.8356	1.81966	19.2657	0.59986	0	0	0.7756	1.29297	0	Cu
13	cg501730q_si_002_clean	3.85	1	4	0.107593	203.34	91	253		65.79	27.39	86.19	11.49	-1.6	31.29	15.2608	10.8434	1.40739	15.2608	0.834696	0	0	0.7224	0.865465	0	Cu
3	GUPBEZ02_clean	8.74	8	9	0.230426	44.09	29	63		59.59	6.19	89.59	6.98	-0.9	14.09	23.8709	10.8478	2.20053	23.8709	0.911245	0	0	0.8024	0.880553	0	Cu
12	TEMPEI_clean	1.71	1	2	0.0866306	205.66	145	236		75.89	14.99	99.09	16.86	-1.1	50.79	15.7146	10.8658	1.44624	15.7146	0.592467	0	0	0.745	1.25745	0	Cu
23	XAHPED_clean	4.48	3	5	0.328596	139.93	111	163		62.43	29.19	87.49	16.17	-0.9	50.59	12.3692	10.8675	1.13818	12.3389	0.374438	0	0	0.8398	2.24283	0	Cu
20	PALTON_clean	1.07	0	2	0.0254422	207.97	130	249		56.08	7.89	74.99	24.67	-0.4	60.19	12.8528	10.8845	1.18083	12.8528	0.723595	0	0	0.677	0.935606	0	Cu
4	ADASEF_clean	4	4	4	0.257341	174.16	135	200		65.2	40.39	90.69	15.24	-1.6	52.09	21.6241	10.9231	1.97967	17.5655	0.435607	0	0	0.8462	1.94258	0	Cu
12	KUVMIZ_clean	4.34	4	5	0.590862	34.45	21	47		57.11	33.89	83.49	16.06	-1.3	37.29	15.7508	11.0076	1.43089	15.7369	0.361001	0	0	0.8214	2.27534	0	Cu,Si
9	ZELROZ_manual	7.97	6	9	0.796802	23.16	7	42		57.35	16.59	83.39	6.51	-2.1	13.79	16.9089	11.0684	1.52767	16.9089	0.361932	0	0	0.8714	2.40763	0	Zn
19	ja512762r_si_002_auto	3.13	0	4	0.0906512	18.03	3	38		46.99	3.19	67.89	5.55	-1.7	12.59	13.2428	11.0914	1.19397	13.2428	0.709182	0	0	0.7414	1.04543	0	Zr
20	JENKET_SL	5.96	5	6	0.24402	29.9	12	54		69.55	41.99	91.99	6.59	-0.9	13.09	12.8466	11.095	1.15788	12.8342	0.704786	0	0	0.6858	0.973062	0	Zn
2	VACLIX_clean	8.69	7	9	0.35419	64.94	42	85		57.04	9.69	85.39	7.48	-6.4	15.79	25.8442	11.118	2.32454	22.6425	0.527457	0	0	0.8434	1.59899	0.000379178	Zr,Ir
4	LARXUA_clean	4.69	4	5	0.364284	115	82	136		71.64	7.39	95.09	15.43	-1.1	51.39	21.8367	11.1395	1.96029	21.8367	0.43704	0	0	0.8068	1.84605	0	Cu
21	ic502643m_si_009_clean	1.99	1	2	0.139933	14.4	5	30		62.19	27.99	86.99	5.86	-2.6	13.39	12.6574	11.15	1.13519	12.638	0.678305	0	0	0.757	1.11602	0	Zn
2	cm901983a_si_001_clean	12.52	9	14	0.31317	55.9	33	81		68.19	15.29	101.59	6.46	-1.2	16.09	27.7973	11.161	2.49056	27.796	0.630774	28.0221	44.4249	0.749	1.18743	0	Si
17	UDANEV_clean	7.07	4	9	0.0962279	455.18	286	531		70.75	5.19	98.39	8.77	-12.3	15.89	13.7994	11.18	1.23429	13.7994	0.783809	0	0	0.7968	1.01657	0	In
13	GOVWOF_clean	1	1	1	0.0915864	26.92	13	45		58.64	42.19	75.69	8.22	-0.5	16.29	15.4253	11.2027	1.37693	15.4253	0.794433	0	0	0.6966	0.876851	0	Mn
19	FORKUU_clean	3.57	2	4	0.118938	64.5	35	91		58.17	20.29	84.79	6.91	-1.6	15.59	13.2648	11.3344	1.17031	13.2648	0.597503	0	0	0.7474	1.25087	0	Zn,Si
17	XOVQEF_SL	5.64	5	6	0.511965	28.28	11	47		60.81	31.09	81.09	6.63	-1.7	13.49	13.738	11.4264	1.20231	13.399	0.433642	0	0	0.8224	1.89649	0	Zn
15	OYERER_clean	6.55	5	8	0.293083	201.46	138	240		53.68	7.79	74.09	12.53	-7.3	24.09	14.3252	11.4527	1.25081	14.0066	0.462369	0	0	0.8394	1.81543	0	Cu,Cr
5	WITKIV_clean	6.33	4	7	0.304933	40.44	16	59		60.16	7.89	93.89	6.81	-4.9	14.19	20.4608	11.4837	1.78173	20.4608	0.586943	0	0	0.7774	1.32449	0	Zn
23	ECAHAT_clean	1.95	0	4	0.0489399	38.57	22	58		72.3	20.69	92.59	6.49	-1.4	11.69	12.3304	11.4865	1.07347	12.3304	0.854274	88.151	103.188	0.6086	0.712418	0	Zn
3	YODWUL_clean	4.63	4	5	0.506249	20.49	7	37		60.07	23.39	91.89	6.87	-2.4	14.39	23.4936	11.5336	2.03697	23.4852	0.424505	0	0	0.849	1.99997	0	Zn
2	GAGZEV_clean	10.7	9	11	0.775777	114.96	87	145		65.42	22.69	102.79	15.66	-0.9	52.69	28.6652	11.5377	2.48448	28.6652	0.279149	0	0	0.8816	3.15817	0	Cu
23	BAPDAA_clean	0.11	0	1	0.00638298	2.7	0	14		79.85	22.09	99.39	4.1	-0.8	11.89	12.3604	11.5468	1.07046	12.3598	1.38142	0	0	0.6892	0.498906	0	Cd
4	QIYDEJ_clean	17.02	13	18	0.362586	317.26	189	382		55.4	20.89	88.89	15.36	-1.4	52.79	22.4897	11.5568	1.94602	22.4897	0.431427	0	0	0.814	1.88676	0	Cu
16	WIJXIY_clean	5.69	5	7	0.453076	16.13	4	34		62.36	26.19	95.39	6.1	-1.6	12.69	14.2439	11.557	1.2325	14.232	0.475086	0	0	0.8226	1.73148	0	Zn
19	c6dt03852b_c6dt03852b2_clean	3.79	3	4	0.13002	34.18	19	51		56.03	8.99	78.79	7	-0.7	15.99	13.1481	11.5799	1.13542	13.1461	0.737977	0	0	0.7482	1.01385	0.000271011	Zr
20	SUGDIJ_auto	10.55	5	13	0.465931	25.86	4	46		53.31	5.69	81.49	5.8	-1.2	14.19	12.9956	11.5941	1.12088	12.537	0.409914	0	0	0.8394	2.04775	0	Zn
19	FEFDEB_manual	3.55	2	4	0.268419	15.53	3	32		69.45	36.09	88.79	6.26	-2.1	12.79	13.1091	11.5975	1.13033	13.1091	0.53928	0	0	0.77	1.42783	0	Zn
19	ic502643m_si_007_clean	2	2	2	0.144113	14.06	3	28		63.38	47.29	82.09	5.68	-1.3	12.79	13.1918	11.6296	1.13433	13.1918	0.690929	0	0	0.7542	1.09157	0	Zn
2	UDEMEW_manual	13.96	13	15	0.306462	42.46	24	63		57.88	19.99	84.69	6.43	-1.5	15.29	28.2375	11.695	2.41449	28.2283	0.681201	46.9906	68.9819	0.7606	1.11656	0	Cr
24	CORZIU_clean	1	1	1	0.0255334	336.12	207	390		93.02	72.59	114.19	8.95	-0.6	17.89	12.1554	11.6975	1.03914	12.1305	0.719622	0	0	0.7504	1.04277	0	In
18	jacs.6b09113_ja6b09113_si_002_clean	6.05	3	7	0.294287	44.63	21	65		58.49	8.99	81.39	8.8	-0.8	19.59	13.3458	11.7012	1.14055	13.3458	0.574767	0	0	0.7742	1.34698	0.000347967	Zr
6	DOZCEC_clean	8	8	8	0.295038	64.76	39	48		56.07	29.89	79.99	7.93	-1.6	18.89	19.114	11.7403	1.62807	19.114	0.458248	0	0	0.8106	1.76891	0	Mn
16	OWIZAW_clean	7.65	4	8	0.410201	140	103	162		58.63	4.39	102.29	16.46	-1.3	51.99	14.2364	11.7567	1.21093	14.2364	0.378656	0	0	0.8398	2.21785	0	Cu
15	ja5b02999_si_003_clean	3.93	3	4	0.215065	14.21	0	32		60.32	29.99	83.29	5.8	-1.1	12.69	14.7024	11.7935	1.24666	14.6946	0.775127	0	0	0.7872	1.01557	0	Cd
2	CIGXIA_manual	12.53	11	15	0.269753	29.91	15	53		53.24	9.89	83.39	5.66	-1.7	13.29	28.4868	11.8329	2.40742	28.4827	0.684425	47.85	69.9127	0.7628	1.11451	0	Fe
7	SICZOV_clean	16.12	12	17	0.552431	117.13	71	160		63.07	7.89	101.59	8.27	-14.3	17.09	18.7609	11.8664	1.58101	18.7609	0.419881	0	0	0.8408	2.00247	0	In
6	NIBHUC_clean	4.53	2	5	0.395944	122.06	84	146		79.15	14.99	106.99	16.27	-1.3	54.69	18.8677	11.8721	1.58925	18.8677	0.449382	0	0	0.8286	1.84387	0	Cu
20	ERAMER_clean	2.96	2	4	0.0782768	56.07	31	83		53.52	9.49	75.19	7.54	-2.4	14.69	12.8398	11.915	1.07761	12.8398	0.685959	0	0	0.7502	1.09365	0.000291563	Zr
9	VETMIS_clean	7.41	6	8	0.520579	101.79	62	122		58.04	7.49	105.29	15.84	-1.6	53.59	17.2398	11.9478	1.44293	17.2288	0.311959	0	0	0.8662	2.77664	0	Cu
15	OYERIV_clean	5.27	2	7	0.118206	111.1	51	152		61.44	12.69	83.39	8.62	-0.4	15.99	14.6803	11.9522	1.22825	14.6803	0.792697	123.823	156.204	0.696	0.878015	0	Cr,Mn
23	MOXPUL_clean	1.94	0	2	0.138563	78.63	45	99		58.61	25.49	75.99	10.32	-1.1	17.59	12.2945	11.9581	1.02813	12.2945	0.744524	0	0	0.6934	0.931333	0	Cu
16	YOZQEK_clean	9.92	8	11	0.280315	78.26	50	106		60.73	12.89	90.59	6.66	-1.5	15.19	13.98	12.0095	1.16407	13.4813	0.61183	0	0	0.7918	1.29415	0	Zn
24	TADWIG_manual	1	1	1	0.122429	13.75	4	29		61.91	41.79	80.79	6.61	-1.2	14.39	12.202	12.0128	1.01575	12.202	0.782648	0	0	0.6702	0.856323	0	Zn
3	HABQUY_clean	9.51	7	11	0.689499	111.2	81	142		54.86	12.69	86.19	15.66	-2.7	52.49	25.7153	12.0883	2.12729	18.8208	0.289452	0	0	0.8738	3.01881	0	Cu
22	ic502643m_si_010_clean	1.82	1	2	0.126391	15.77	6	31		63.28	20.59	88.29	5.95	-1.2	13.09	12.4694	12.0996	1.03056	12.4634	0.660845	0	0	0.7614	1.15216	0	Zn
3	ADATIK_clean	7.66	6	9	0.554313	179.62	130	215		68.09	2.89	99.29	15.82	-15.3	54.89	24.5508	12.1743	2.01662	18.6293	0.377577	0	0	0.8764	2.32112	0	Cu
2	CUSYAR_clean	29.89	25	32	1.21668	56.64	25	88		52.78	4.69	87.09	6.06	-1.8	13.59	28.0134	12.18	2.29996	27.6012	0.247232	0	0	0.9076	3.67105	0	Zn
3	ja512973b_si_004_auto	3.96	3	4	0.884771	9.16	1	21		56.79	11.79	82.59	6.43	-2.2	13.69	23.1345	12.211	1.89456	23.1337	0.298536	0	0	0.864	2.89413	0	Zr
20	TADWEC_manual	1	1	1	0.115195	10.62	2	24		60.83	41.69	77.99	6.25	-1.7	13.19	12.9835	12.2235	1.06218	12.9835	0.782876	0	0	0.6462	0.825418	0	Zn
19	NUTYIM_clean	7.46	5	8	0.210247	76.19	35	101		69.7	31.79	92.29	9.01	-1.2	19.59	13.0843	12.3569	1.05887	13.0843	0.80193	0	0	0.7446	0.92851	0	Tb
19	NUTYEI_clean	7.84	6	8	0.224175	83.95	50	106		68.79	8.59	91.89	8.23	-3.7	16.89	13.0852	12.3573	1.0589	13.0399	0.787627	0	0	0.7456	0.946641	0	Eu
19	WOLYON_clean	3.24	3	4	0.231523	32.69	17	50		66.56	31.79	91.79	7.63	-1.5	15.29	13.0808	12.3802	1.05659	13.062	0.690785	0	0	0.695	1.0061	0	Mn
21	WUTBEU_clean	3.09	1	4	0.118839	17.43	1	36		70.28	29.39	92.79	6.7	-1.1	13.59	12.6568	12.4515	1.01649	12.6568	0.754809	0	0	0.7462	0.988595	0	Zr
19	FUNCEX_clean	4	4	4	0.226684	36.59	23	54		58.77	36.59	76.79	6.94	-1.2	13.79	13.2156	12.4769	1.0592	13.2156	0.543761	0	0	0.7842	1.44218	0	Zn
14	XOXMED_clean	5.48	4	8	0.305985	32.97	15	59		50.55	7.49	74.49	6.26	-2.4	13.39	15.2027	12.4876	1.21742	14.6851	0.499	0	0	0.7876	1.57836	0	Zn
3	AVAKEP_clean	10	10	10	1.19752	74.13	49	90		61.85	32.39	91.79	14.36	-0.9	51.79	25.1756	12.4937	2.01507	25.1756	0.244994	0	0	0.8902	3.63356	0	Cu
12	XAVKIR_clean	4	4	4	0.225228	109.66	88	125		65.71	43.39	91.79	13.06	-1.1	41.89	15.6283	12.5137	1.2489	15.6283	0.534545	0	0	0.7824	1.46367	0	Cu
2	AVAKAL_clean	11.11	9	12	1.53204	73.12	46	97		65.31	12.59	114.39	13.78	-1.5	51.49	26.2529	12.5751	2.08769	26.2529	0.207415	0	0	0.913	4.40181	0	Cu
9	KIYXUN_clean	2	2	2	0.0433213	430.52	268	485		92.75	65.89	115.39	16.42	-0.4	36.79	17.2901	12.6482	1.367	17.276	0.96734	0.0532371	0.0550346	0.6946	0.718052	0	Cu,Mn
12	FAHPOV_clean	4	4	4	0.354671	13.81	3	28		53.82	36.89	76.39	6.2	-2.6	13.49	15.8333	12.7086	1.24587	15.7735	0.465056	0	0	0.8222	1.76796	0	Zn
4	ZUCKIT_clean	17.72	14	18	0.320647	94.53	53	123		57.54	20.59	87.09	7.02	-1.2	15.69	21.5414	12.8264	1.67946	21.5414	0.534491	408.868	764.967	0.7688	1.43838	0	Y
16	OHUMEL_clean	13.45	12	15	0.206292	224.53	136	272		52.51	5.59	76.39	9.37	-1	18.79	14.0984	12.8651	1.09586	14.0984	0.808879	0.123257	0.15238	0.8014	0.990754	0	Mo,Zn
16	QAQMON_clean	2.81	1	4	0.157913	239.68	173	272		70.02	16.39	88.49	16.83	0.09	54.09	13.98	12.8757	1.08577	13.975	0.607595	0	0	0.7644	1.25807	0	Cu
19	NALYEG_clean	3	3	3	0.0809421	106.35	59	127		96.73	77.79	114.19	13.19	-0.4	25.69	13.1227	12.8815	1.01872	13.1227	1.5741	0	0	0.6462	0.41052	0	U
9	NATKIF_clean	12.65	10	15	0.577467	175.48	120	209		56.17	7.59	84.59	15.84	-1.9	56.89	17.0098	12.9386	1.31466	16.4375	0.345463	0	0	0.8556	2.47668	0	Cu
3	OKUTEV_clean	15	15	15	0.697896	204.59	142	238		59.7	30.09	103.89	15.71	-0.7	50.69	23.0646	12.9827	1.77656	23.0646	0.330655	0	0	0.865	2.61602	0	Cu
1	YUSWEP_manual	17.81	13	19	0.396451	350.23	179	429		64.64	12.19	136.39	17.16	-1.3	acscombsci-5b00188	37.3405	13.0059	2.87104	37.3155	0.403891	0	0	0.8324	2.06095	0	Cu
15	ja5b02999_si_004_clean	4.82	4	5	0.321054	22.81	7	38		66.71	20.89	103.99	6.74	-1.1	16.89	14.6919	13.07	1.12409	14.6894	0.678878	0	0	0.7962	1.17282	0	Cd
12	XODPUD_clean	1.99	1	2	0.203869	6.18	0	17		57.81	22.69	85.29	6.1	-2.1	14.89	15.8538	13.0893	1.2112	15.8538	0.622253	0	0	0.7882	1.26669	0	Zn,Cr
19	GAGSUF_clean	2	2	2	0.0546888	93.79	45	127		91.13	75.39	105.79	10.04	-0.5	19.49	13.2756	13.091	1.0141	13.2756	1.53244	0	0	0.652	0.425465	0	Th
14	XUTQEI_clean	4.72	3	6	0.433405	34.51	12	60		64.03	1.89	93.39	6.77	-27.7	14.89	15.0711	13.1397	1.14699	15.0711	0.479637	0	0	0.7968	1.66126	0	Ni
4	TOVKOG_clean	22.47	19	24	0.793669	52.85	29	78		55.53	6.59	99.49	6.26	-1.2	14.09	22.8421	13.1462	1.73755	21.4919	0.3316	0	0	0.8634	2.60374	0	Fe
16	VEMMIK_clean	3.54	3	4	0.218985	97.5	48	122		65.58	31.59	87.19	9.42	-0.5	18.29	14.0147	13.1676	1.06433	14.0142	0.723032	0	0	0.741	1.02485	0	Mn
14	XAFFOB_clean	6.04	5	7	0.419372	117.2	85	140		73.66	12.59	119.79	17.22	-2.5	53.99	14.8391	13.174	1.12639	14.8391	0.366991	0	0	0.845	2.30251	0	Cu
16	XAFFIV_clean	9.37	8	11	0.658291	26.11	9	45		55.61	16.29	81.69	6.31	-2.3	13.59	14.2292	13.1937	1.07848	14.2292	0.358398	0	0	0.8506	2.37334	0	Co
3	OKUSUK_clean	16.88	14	18	0.652998	203.31	135	236		61.54	1.59	107.19	15.72	-1.1	52.69	24.786	13.198	1.87802	24.786	0.313235	0	0	0.8766	2.79854	0	Cu
11	RUYVIS_clean	3.71	3	4	0.239114	13.63	3	27		61.72	7.19	90.99	6.4	-1.7	15.19	15.8929	13.202	1.20382	15.799	0.679059	0	0	0.7374	1.08592	0	Eu
14	XAFFAN_clean	9.77	9	10	0.675211	26.46	6	43		54.86	11.19	86.39	6	-1.5	13.69	14.9132	13.243	1.12611	14.9132	0.365184	0	0	0.8544	2.33964	0	Zn
14	VAGMAT_clean	8.08	8	9	0.558414	21.46	9	38		50.5	22.39	81.89	5.85	-1	13.89	14.9209	13.2604	1.12522	14.9209	0.364732	0	0	0.86	2.3579	0	Zn
16	IVILEG_clean	3.45	2	4	0.198407	20.81	8	42		61.68	21.09	85.09	6.28	-1.1	13.69	14.1452	13.2662	1.06626	14.1341	0.718024	0	0	0.7232	1.00721	0	Zn
6	AXINAX01_clean	5.92	5	6	0.792937	19.54	6	33		66.98	27.69	101.99	7.02	-0.8	17.09	19.4749	13.2777	1.46673	19.4746	0.402001	0	0	0.8346	2.07611	0	Co
15	ZARLEL_clean	10.45	8	11	0.450645	33.76	11	52		61.88	10.89	90.89	6.61	-1.3	14.29	14.4312	13.2845	1.08631	14.4312	0.493906	0	0	0.7906	1.60071	0	Zn
16	XAFFER_clean	9.15	8	10	0.607279	26.96	7	49		59.79	7.89	89.39	6.01	-3.2	13.59	14.2192	13.2889	1.07001	14.2192	0.359874	0	0	0.8504	2.36305	0	Zn
2	ADATEG_manual	15.88	14	17	1.18427	100.35	67	128		59.33	15.89	94.09	15.11	-1.1	52.79	27.3378	13.339	2.04946	27.3378	0.238777	0	0	0.896	3.75246	0	Cu
7	ALULEZ_clean	6.81	5	7	0.560043	17.97	9	34		60.21	13.49	93.59	6.38	-1.4	13.59	18.755	13.3791	1.40181	18.6888	0.425946	0	0	0.8336	1.95706	0	Ce
13	GITVEL01_clean	1.51	1	2	0.120177	30.01	18	44		53.42	18.99	75.19	7.71	-1.1	15.79	15.2767	13.3793	1.14181	15.2767	0.777112	0	0	0.723	0.930368	0	Zn
14	GITVEL_clean	1.94	1	2	0.1544	33.05	19	49		58.05	30.59	84.89	7.71	-0.9	14.69	15.2459	13.3795	1.1395	15.2459	0.777112	0	0	0.724	0.931654	0	Zn
15	XAHPIH_clean	8.7	6	9	0.692066	160.82	111	184		81.51	11.19	124.39	15.26	-10.4	52.69	14.3167	13.3795	1.07005	14.2342	0.356183	0	0	0.8698	2.442	0	Cu
14	DOKDEN_clean	3.66	2	4	0.192391	84.44	44	108		68.36	7.59	90.59	8.47	-1.4	16.39	15.1422	13.4436	1.12634	15.1422	0.712137	0	0	0.7026	0.986608	0	Cu
12	ja5b02999_si_006_clean	5.84	4	6	0.171226	245.9	145	294		73.45	22.09	97.09	11.08	-0.8	23.89	15.8149	13.6198	1.16117	15.8149	0.591093	0	0	0.7794	1.31858	0	Cd,Na
16	REZXOK_clean	7.58	4	8	0.501873	24.7	5	44		67.18	30.39	92.49	6.62	-2.3	15.49	14.2106	13.622	1.04321	14.209	0.470058	0	0	0.8176	1.73936	0	Fe
17	HUYKIV_clean	3.98	3	4	0.408803	20.13	4	34		70.33	37.79	99.89	7.33	-2.3	14.39	13.8999	13.6804	1.01604	13.8999	0.580343	17.6299	30.3783	0.7586	1.30716	0	Ni
12	KOJZEP_manual	1	1	1	0.122726	90.61	79	105		59.61	44.39	74.79	16.99	-1.7	54.89	15.6144	13.7184	1.13821	15.6144	0.514247	0	0	0.7936	1.54323	0	Cu
7	ABEXEN_clean	2	2	2	0.218454	17.37	6	30		71.12	41.99	99.09	7.15	-0.7	14.39	18.8079	13.7187	1.37097	18.7996	0.674371	10.9626	16.2561	0.753	1.1166	0	In
15	LOXKAM_clean	2	2	2	0.105527	17.87	6	36		66.29	52.19	85.19	5.95	-1.6	13.49	14.5599	13.7822	1.05642	14.5599	0.784824	0	0	0.661	0.842227	0	Cd
15	VUKHOZ_clean	2	2	2	0.0902585	73.08	56	89		61.15	42.59	87.99	11.55	-0.4	19.79	14.7203	13.8111	1.06584	14.7203	1.23894	0	0	0.6248	0.504303	0	Ag
6	OXOLAP_SL	2.8	2	3	0.427554	10.7	0	23		71.07	40.09	96.69	6.99	-1.4	12.79	19.1008	13.8578	1.37834	19.1008	0.601751	80.0846	133.086	0.7556	1.25567	0.000332363	Zr
13	REZXUQ_clean	9.48	7	10	0.580867	28.87	11	46		54.59	19.09	92.39	6.63	-1.9	15.29	15.2629	13.9599	1.09334	15.2629	0.361934	0	0	0.8582	2.37115	0	Cr
2	BAZGEQ_clean	9.84	7	10	0.706298	117.83	75	149		59.26	16.19	88.09	15.61	-1.7	52.69	27.2403	13.9632	1.95087	26.7524	0.334895	0	0	0.8624	2.57514	0	Cu
13	XONLES01_clean	3.97	3	4	0.882764	40.35	28	55		64.75	16.69	92.99	15.65	-1.8	51.69	15.5522	13.9713	1.11316	15.5522	0.303181	0	0	0.871	2.87288	0	Cu
1	OCUNAC_manual	32.16	25	36	0.622989	64.31	35	94		49.35	3.29	79.69	5.87	-1.5	13.09	36.1506	14.0466	2.57361	36.1506	0.427517	0	0	0.8368	1.95735	0	Cr
14	IXEJOM_clean	3.93	3	4	0.0900202	288.21	176	324		56.69	20.69	79.29	9.64	-0.9	17.89	15.0282	14.1511	1.06199	15.0282	0.818993	0	0	0.749	0.914537	0.000244202	Zr
13	PIBNUK01_clean	3.99	3	4	0.813614	11.2	3	26		66.64	26.49	91.09	6.61	-0.9	13.99	15.3719	14.1834	1.0838	15.3589	0.42304	0	0	0.8366	1.97759	0	Zn
13	PIBNUK_clean	3.94	3	4	0.803418	13.97	5	27		68.7	11.39	99.79	7.26	-2.3	13.29	15.3841	14.1862	1.08444	15.3838	0.422713	0	0	0.8378	1.98196	0	Zn
13	PIBPIA_clean	4	4	4	0.720857	11.69	2	26		60.27	39.09	85.79	6.49	-1.7	13.79	15.4937	14.2536	1.087	15.4741	0.458724	0	0	0.8362	1.82288	0	Cd
9	ja408959g_si_003_clean	3.75	3	4	0.148216	175.22	134	193		64.88	8.19	95.39	9.65	-2.8	18.49	17.3375	14.3282	1.21003	17.3375	0.750299	1.3371	1.78209	0.7272	0.969213	0.00026656	Zr
15	LOQLEJ_manual	4	4	4	0.0895506	34.2	17	55		70.28	48.39	101.19	6.43	-1.9	14.29	14.6986	14.4045	1.02041	14.6163	0.993806	0	0	0.6928	0.697118	0	In
8	YUXQIS_clean	7.95	6	8	0.177325	45.63	23	73		56.55	17.99	85.39	6.07	-7.4	14.19	17.6536	14.4198	1.22426	17.6536	0.688928	0	0	0.7418	1.07675	0	Cd
9	ja5103103_si_002_auto	8.67	8	9	0.442284	30.49	15	50		55.78	16.09	87.39	6.47	-2.7	14.49	16.9503	14.4517	1.1729	16.9435	0.50204	0	0	0.8216	1.63652	0	Zr,Fe
7	DOMDAL_clean	5.83	5	6	0.337209	104.97	76	121		64.3	7.09	105.19	17.09	-1.5	37.99	18.4338	14.4549	1.27527	18.4338	0.66329	0	0	0.7914	1.19314	0	Tb
6	ja500330a_si_007_auto	7.1	6	8	0.299252	43.59	26	70		54.77	6.19	82.09	7.54	-1.6	16.39	19.4624	14.4876	1.34338	19.4472	0.798895	18.6426	23.3354	0.7758	0.971091	0.000500691	Zr
13	VAGMEX_clean	8.78	8	10	0.606791	25.81	6	47		50.99	1.99	75.99	6.14	-1.9	13.89	15.2806	14.4886	1.05466	15.2806	0.352218	0	0	0.863	2.45019	0	Zn
5	ALEJAE_clean	23.92	21	26	1.07206	104.89	62	138		55.07	6.99	88.69	7.95	-1.7	17.89	19.8654	14.5686	1.36358	19.8654	0.274675	0	0	0.8942	3.25548	0	In
4	YODWOF_clean	6.9	6	7	0.800042	17.88	7	31		59.77	2.79	90.29	6.47	-2.3	14.19	21.6034	14.6374	1.4759	21.6034	0.354351	0	0	0.8718	2.46027	0	Zn
3	RUTNOK_manual	5	5	5	1.52594	13.42	5	27		62.53	38.39	92.29	6.85	-1.7	15.69	24.6126	14.6485	1.68022	24.6126	0.240823	0	0	0.9018	3.74465	0	Zn
11	FIFGEI_clean	10.69	10	11	0.54082	85.07	48	112		58.65	11.89	94.29	8.08	-12	17.49	16.1529	14.6931	1.09935	16.1529	0.412792	0	0	0.8636	2.09209	0	In
11	KOJZIT_clean	1.63	1	2	0.210651	75.75	60	91		59.81	18.99	88.99	17.36	-0.8	52.19	16.1957	14.7503	1.09799	16.1957	0.506406	0	0	0.7912	1.56238	0	Cu
14	GOMFOF_clean	4.55	4	6	0.101443	111.32	77	137		59.51	16.99	87.99	14.17	-2.3	27.69	14.8276	14.7703	1.00388	14.8276	0.887088	0	0	0.6208	0.699818	0	Pd,K
12	JUTCIM_clean	3	3	3	0.100501	374.9	248	418		54.95	33.39	76.49	18.68	-1.6	69.39	15.7407	14.8786	1.05794	15.7407	0.734143	0	0	0.7486	1.01969	0	Cu
2	NIBHOW_clean	5.8	5	6	1.18879	64.57	45	81		74.71	28.69	110.29	14.62	-0.3	52.39	27.5106	14.8846	1.84826	27.4888	0.279595	0	0	0.8844	3.16315	0	Cu
7	HOHMEX_manual	3.53	3	4	0.942119	29.39	19	43		60.92	25.59	91.99	10.11	-1	19.99	18.7842	14.8946	1.26114	18.7842	0.315898	0	0	0.8756	2.77178	0	Cu
8	SALXEL_clean	5	5	5	0.141151	144.17	93	177		64.23	37.49	91.29	9.04	-0.6	16.89	17.7233	14.9258	1.18743	17.7233	0.954529	49.7541	52.1243	0.7288	0.763518	0.000419055	Zr
2	QIYDIN_clean	10.95	9	11	1.71577	65.61	45	89		69.62	23.49	102.79	14.35	-1.4	54.09	29.975	15.0225	1.99534	29.835	0.197643	0	0	0.9182	4.64576	0	Cu
11	GULVUF_clean	3.68	3	4	0.24675	28.1	14	43		62.11	35.49	85.69	6.63	-3.7	14.79	16.1004	15.3251	1.05058	16.0983	0.674334	0	0	0.7312	1.08433	0	Yb
9	XAHPON_clean	14.81	13	15	0.91032	165.53	105	196		63.51	17.49	107.49	14.91	-1.8	53.59	17.2951	15.3322	1.12803	17.2951	0.284265	0	0	0.8856	3.1154	0	Cu
11	IKOVEL_clean	5.43	4	6	0.113988	323.83	185	376		57.18	3.29	78.29	14.85	-16.7	35.29	15.9244	15.4838	1.02845	15.9244	0.975432	0	0	0.643	0.659195	0	Pr,K
8	KAWHEY_clean	7.64	6	8	0.564199	30.3	11	51		66.53	19.72	97.39	6.54	-1	14.39	18.2148	15.5853	1.16872	18.2148	0.462868	0	0	0.8126	1.75558	0	Zn
11	IKOTUZ_clean	5.97	5	6	0.123443	316.35	187	381		57.67	23.39	79.59	14.38	-1.4	30.39	16.0507	15.6466	1.02583	16.0507	1.00283	0	0	0.658	0.656142	0	Sm,K
11	IKOVAH_clean	6	6	6	0.123735	293.35	164	345		59.72	36.79	92.29	13.03	-3.4	25.39	16.0663	15.6884	1.02409	16.0584	1.01053	0	0	0.6416	0.634917	0	Eu,K
9	FEBXIV_clean	15.66	13	16	0.886415	167.13	122	196		65.91	15.59	120.39	14.57	-1.5	53.99	17.2864	15.7464	1.0978	17.2793	0.293688	0	0	0.8788	2.99229	0	Cu
12	JOYKUF_clean	8	8	8	0.383745	77.64	37	104		71.24	46.49	99.89	8.67	-3.7	16.29	15.8468	15.7515	1.00605	15.8468	0.656923	0	0	0.7706	1.17304	0	Mn
11	XIDSUZ_clean	4	4	4	0.223648	141.81	99	163		58.12	38.09	77.19	15.83	-1.3	42.69	16.0531	15.7898	1.01668	16.0531	0.493271	0	0	0.781	1.58331	0	Cu
11	FIDRIV_clean	5.69	5	6	0.164011	124.38	73	156		68.69	14.39	108.29	10.15	-8.7	20.19	15.9933	15.9026	1.0057	15.9933	0.698397	0	0	0.7102	1.0169	0	Dy,Na
2	HEXVEM_clean	6.38	5	7	1.20589	52.8	40	71		76.53	10.99	114.99	14.31	-1.1	52.39	28.4313	15.9175	1.78616	28.4313	0.251734	0	0	0.895	3.55533	0	Cu
9	RAVVUH_clean	7.78	6	8	0.355928	55.16	27	81		69.66	10.09	106.39	7.37	-3.7	15.99	17.1826	16.3771	1.04919	17.1825	0.61117	0	0	0.7478	1.22355	0	Mg
8	LETPUX_clean	7.46	6	8	0.13472	74.27	50	97		55.22	18.09	82.39	7.24	-0.9	15.59	17.6553	16.4347	1.07427	17.6553	1.06966	0	0	0.7454	0.69686	0	Zn,Ga
8	LETPUX01_clean	7.22	4	8	0.130386	68.72	43	90		52.48	6.29	77.29	6.95	-1.4	14.79	17.6553	16.4347	1.07427	17.6553	1.06966	0	0	0.7452	0.696673	0	Zn,Ga
10	ja300034j_si_002_clean	8	8	8	0.291006	28.08	13	45		69.23	40.39	96.89	6.68	-2	14.29	16.7889	16.7175	1.00427	16.7889	0.713223	0	0	0.772	1.08241	0	Zn
8	ja5b02999_si_002_clean	9.77	9	10	0.267406	38.84	20	62		57.8	10.19	80.19	6.25	-1.6	14.59	17.6862	16.7388	1.0566	17.6862	0.597274	0	0	0.8228	1.37759	0	Cd
9	MALROJ_clean	9.17	8	10	0.34465	40.78	20	62		69.81	29.99	104.89	7.02	-1.3	14.69	16.8437	16.7642	1.00474	16.8437	0.692416	0	0	0.7588	1.09587	0	Co
9	MALRUP_clean	8.68	8	9	0.331506	50.42	28	70		65.89	24.29	93.69	7.43	-4.4	15.69	16.9241	16.8441	1.00475	16.9241	0.675419	0	0	0.764	1.13115	0	Fe
7	BIPSUQ_clean	4.84	4	5	0.374288	168.6	126	198		72.08	31.69	109.49	16.86	-0.8	49.99	18.6145	16.9288	1.09957	18.6145	0.43749	0	0	0.8374	1.9141	0	Cu
8	ATIJUJ_manual	7.85	7	8	0.245641	27.59	11	45		54.65	12.59	77.69	6.65	-2.4	13.39	17.4403	16.9544	1.02866	17.4403	0.753394	0	0	0.7098	0.942136	0	Co
6	QIYDOT_clean	9.62	8	10	1.56219	53.72	36	69		64.47	19.99	115.59	13.03	-1	52.39	19.8186	17.0636	1.16145	19.6398	0.211978	0	0	0.9118	4.30139	0	Cu
3	ADUROI_clean	18.61	15	20	0.723842	51.97	26	71		59.94	11.19	92.59	6.53	-1.3	15.39	25.6855	17.1242	1.49995	25.6855	0.402567	0	0	0.8358	2.07617	0	Zn
7	DADLOM_clean	6.13	6	7	0.322171	29.46	15	46		63.89	34.29	97.49	6.91	-1.2	16.19	18.7113	17.3665	1.07744	18.6976	0.589373	0	0	0.7274	1.23419	0	Mn
8	RAVWAO_clean	3.99	3	4	0.550358	26.83	11	41		68.9	28.39	93.69	7.78	-1.3	14.79	17.9252	17.514	1.02348	17.9252	0.536552	0	0	0.7562	1.40937	0	Mg
7	LETQAE_clean	11.83	9	13	0.178264	108.69	68	140		52.07	6.59	82.39	7.05	-1	15.79	18.3193	17.5552	1.04352	18.3193	0.940384	0	0	0.7778	0.827109	0	Zn,Ga
7	BIHBAX_clean	41.59	34	46	0.90614	76.32	32	114		46.4	0.49	79.29	6.02	-2.6	13.99	18.5744	17.5567	1.05797	18.5744	0.321672	0	0	0.8984	2.79291	0	Ag,Cr
6	ECOKAJ_clean	6.61	5	7	1.15044	18.1	3	34		63.11	28.69	95.79	6.91	-0.4	14.69	18.9972	17.5755	1.08089	18.9888	0.325331	0	0	0.873	2.68342	0	Zn
1	UNUNEY_clean	41.87	35	44	1.49521	133.16	57	176		55.38	18.89	89.29	9.25	-1.8	23.19	34.0067	17.6376	1.92808	34.0067	0.237838	0	0	0.9182	3.86062	0	U
6	XIGFOJ_manual	12.99	9	15	0.321777	58.02	26	93		61.84	13.29	87.29	6.63	-1.3	14.29	18.9086	18.7295	1.00956	18.9086	0.692037	0	0	0.7528	1.0878	0	Cd
5	RUBDUP_clean	8.82	8	10	1.16551	22.09	3	45		62	21.29	97.39	6.75	-9.7	13.29	21.0952	19.2468	1.09604	20.9848	0.298857	0	0	0.868	2.9044	0	Zn
6	OJIDAN_clean	3.38	3	4	0.241255	35.11	21	49		65.33	30.09	88.99	9.53	-0.8	16.59	19.7987	19.3368	1.02389	19.7826	0.704653	21.5807	30.626	0.6956	0.987152	0	Sc
1	AVAJUE_clean	53.49	42	59	1.9619	233.9	129	294		54.03	6.39	114.79	13.95	-2.1	50.99	37.5257	19.5411	1.92035	37.5257	0.164116	0	0	0.9304	5.66915	0	Cu
3	ja403810k_si_002_clean	24.1	20	26	0.739509	67.64	36	96		56.1	13.09	95.39	6.64	-2	14.59	24.1144	19.5628	1.23267	24.1144	0.396669	0	0	0.86	2.16806	0	Zn
3	XAFFUH_clean	9.43	9	10	0.629366	150.04	97	175		60.09	25.59	121.09	15.34	-0.6	49.59	23.7283	19.638	1.20829	23.7279	0.329166	0	0	0.8726	2.65094	0	Cu
2	jacs.6b01663_ja6b01663_si_003_clean	7.69	6	9	0.82653	23.63	8	42		56.47	9.99	94.39	7.18	-0.6	16.49	27.6264	19.6462	1.40619	27.6264	0.319125	0	0	0.874	2.73874	0	Zr
4	XAHPUT_clean	9.68	7	10	2.03631	49.96	34	68		61.02	8.19	88.69	13.88	-12.3	52.59	21.8281	20.5859	1.06034	21.8281	0.178675	0	0	0.9154	5.12326	0	Cu
4	BIGZUO_clean	18.68	16	19	0.931818	41.18	20	63		54.26	8.89	83.89	6.62	-1.4	14.99	21.7232	20.9879	1.03503	21.5266	0.308304	0	0	0.9064	2.93995	0	Ag,Cr
4	IZERAI_clean	12.09	10	13	0.329642	95.97	47	132		70.64	9.99	110.19	7.01	-1.1	14.19	21.8199	21.117	1.03329	21.8199	0.624269	0	0	0.7802	1.24978	0	Ni
1	UHUPOD01_clean	41.19	35	45	2.10887	85.9	46	123		57.37	10.29	105.59	6.62	-2.1	14.29	33.0778	21.4039	1.54541	33.0778	0.19136	0	0	0.937	4.89652	0	Zn
3	XAHQAA_clean	10.79	9	11	2.37974	52.3	33	69		66.9	6.29	103.69	13.18	-0.6	54.59	23.0353	21.6072	1.0661	23.0258	0.170429	0	0	0.9292	5.45213	0	Cu
3	UBULIO_SL	6.47	5	7	0.410526	22.48	8	48		58.91	29.09	81.89	5.84	-1.5	13.09	24.2323	22.8992	1.05821	24.215	0.438068	0	0	0.8258	1.8851	0	Zn
2	ja507269n_si_002_clean	5.98	5	6	0.694051	18.14	7	30		60.69	16.79	81.59	6.62	-2.7	14.49	27.3395	23.1844	1.17922	27.3395	0.358752	0	0	0.865	2.41113	0	Fe
3	RAVWES_clean	5	5	5	0.553399	26.92	15	40		58.26	35.79	87.69	7.46	-0.9	14.49	24.4406	23.6272	1.03443	24.4406	0.439059	0	0	0.7912	1.80203	0	Mg
1	BAZGAM_clean	22.54	20	24	3.2484	81.59	55	111		61.24	13.79	120.79	12.67	-1.7	51.89	42.798	24.2406	1.76555	42.7982	0.126526	0	0	0.9392	7.42299	0	Cu
3	LETQEI_clean	28.57	25	31	0.281368	163.57	77	213		53.34	11.49	88.79	6.87	-1.8	13.09	25.6894	25.4389	1.00984	25.6894	0.814849	0	0	0.8076	0.991104	0	Zn,Ga
2	ja507269n_si_003_clean	6.92	5	7	0.92841	15.78	3	31		65.61	7.49	91.19	6.45	-1.3	12.99	27.2094	25.5491	1.06498	27.2094	0.339031	0	0	0.869	2.56319	0	Fe,Co
2	LETRAF_clean	28.52	23	31	0.318212	112.14	62	150		49.75	10.39	85.29	6.56	-1.8	14.19	26.759	26.4932	1.01003	26.7419	0.733819	0	0	0.828	1.12834	0	Zn,Ga
2	jacs.6b08724_ja6b08724_si_014_clean	6.72	6	7	1.1137	15.87	4	30		61.52	6.19	98.69	6.66	-0.7	15.59	28.056	26.5894	1.05516	28.056	0.284192	0	0	0.8798	3.09579	0	Mg
2	jacs.6b08724_ja6b08724_si_009_clean	7.64	6	8	1.01815	21.74	6	41		69.03	2.59	105.59	6.71	-1	14.49	28.3891	26.8915	1.05569	28.3891	0.324235	0	0	0.8668	2.67337	0	Co
2	RAVWOC_clean	8.69	7	10	0.741912	31.87	18	46		58.05	14.99	91.89	7.17	-1	15.09	28.2177	27.5597	1.02388	28.2177	0.383766	0	0	0.7968	2.07627	0	Mg
1	QEFWUV_clean	9.04	8	10	0.455231	60.24	36	83		62.07	16.39	97.09	7.41	-2.7	15.59	32.3604	28.2677	1.14478	32.3563	0.473548	0	0	0.826	1.74428	0.000422344	Zr,Fe
2	ja4050828_auto	7.95	7	9	0.533675	25.65	9	44		66.38	18.59	98.29	6.75	-1.5	13.39	29.2834	28.7488	1.0186	29.2759	0.488759	0	0	0.8256	1.68918	0	Zr
1	FOTNIN_clean	10.89	9	12	1.53504	34.47	19	51		59.94	12.89	91.59	7.4	-1.2	14.89	33.6216	29.9295	1.12336	33.5555	0.240324	0	0	0.9206	3.83066	0	Zr
1	RAVWIW_clean	9.95	8	10	0.919566	37.5	19	55		62.46	8.59	104.99	7.32	-0.9	14.49	30.7005	30.1441	1.01846	30.7005	0.362219	0	0	0.82	2.26383	0	Mg
1	ja408959g_si_002_clean	8.63	7	9	0.524656	30.33	13	45		65.97	17.49	96.29	7.26	-5.1	15.29	31.0724	30.385	1.02263	31.0724	0.440944	0	0	0.8264	1.87416	0.000453572	Zr
1	BEDYEQ_clean	9.24	7	10	0.482365	55.77	32	75		58.77	17.39	98.19	7.33	-1.6	16.89	33.0586	31.4905	1.0498	33.0586	0.462445	0	0	0.8292	1.79308	0.000432484	Zr,Fe
1	BUXZAX_clean	9.85	8	10	0.404188	60.58	37	79		61.36	25.29	89.99	7.5	-1.2	17.09	33.3768	31.8162	1.04905	33.3697	0.55548	0	0	0.8332	1.49996	0.000360049	Fe,Hf
1	RAVXAP_clean	18.04	15	20	1.07412	44.55	20	72		57.63	5.49	100.29	6.65	-4.7	14.89	34.8596	34.3554	1.01468	34.8596	0.286106	0	0	0.8406	2.93808	0	Mg
1	EMIZAD_clean	9.91	8	11	0.608331	36.61	21	54		62.49	9.09	102.99	7.45	-1.1	17.39	35.5888	34.5106	1.03124	35.5878	0.382184	0	0	0.8516	2.22824	0.000523308	Zr
1	BUNLAZ_clean	12.6	10	15	0.691012	37.79	16	68		57.34	7.99	91.69	6.69	-10	14.39	38.3964	36.0932	1.06381	38.3964	0.330751	0	0	0.8776	2.65335	0	Zr
1	RAVWUI_clean	14.73	12	15	1.05111	32.41	17	50		64.64	21.19	93.69	6.87	-1.4	17.29	36.7876	36.4331	1.00973	36.7876	0.334728	0	0	0.8506	2.54117	0	Zn
1	BUNKUS_clean	13.63	12	14	0.559298	100.04	65	126		58.89	16.99	95.99	8.31	-1.1	19.49	39.1106	37.4764	1.04361	39.1106	0.375289	0	0	0.8658	2.30702	0	Zr
1	RAVXET_clean	17.34	15	18	0.890607	51.65	26	73		55.55	19.19	90.99	6.98	-0.7	13.99	38.2281	38.0665	1.00425	38.2281	0.326773	0	0	0.8304	2.54121	0	Mg
1	RAVXIX_clean	32.23	25	35	1.58257	73.83	34	105		57.53	7.49	102.99	6.65	-1.2	14.79	53.5767	53.2643	1.00587	53.5767	0.23463	0	0	0.8668	3.69432	0	Mg
1	RAVXOD_clean	55.07	46	57	2.0907	103.47	54	146		52.45	3.19	94.69	6.57	-1.2	15.99	71.6412	71.502	1.00195	71.6412	0.179103	0	0	0.8986	5.01724	0	Mg
17	LASDEQ_clean	0	0	0	0	647.96	367	753		0	0	0	17.54	-2.7	51.99	13.8531	8.72821	1.58716	13.8408	0.762381	0	0	0.7444	0.976415	0	Cu
17	JOCWIJ_clean	0	0	0	0	548.9	324	640		0	0	0	16.94	-3.7	41.89	13.8977	5.51402	2.52042	13.8972	0.824207	13.4154	16.2767	0.735	0.891766	0	Cu
12	RAYFAA_clean	0	0	0	0	456.9	270	525		0	0	0	23.92	-1	55.79	15.8178	9.45289	1.67333	13.6288	0.959285	0	0	0.6988	0.728459	0	Cu
23	FIBKEI_clean	0	0	0	0	394.46	270	440		0	0	0	16.25	-0.1	53.39	12.3346	6.95883	1.7725	12.3286	0.708252	0	0	0.7362	1.03946	0	Cu
16	NIGDIS_clean	0	0	0	0	391.16	255	448		0	0	0	16.45	-0.2	49.09	14.0316	7.36423	1.90538	14.0316	0.622681	0	0	0.7674	1.23241	0	Cu
20	KARNID_clean	0	0	0	0	385.99	271	434		0	0	0	17.52	0.69	55.79	13.0436	6.77607	1.92495	13.0436	0.899644	0	0	0.69	0.76697	0	Cu
14	MIVFEE_clean	0	0	0	0	368.78	230	418		0	0	0	14.33	-7.8	36.89	15.2363	7.95854	1.91446	15.2238	1.38989	457.865	329.426	0.6876	0.494716	0	Cu,Mn
10	science.1056698_manual	0	0	0	0	366.29	223	435		0	0	0	17.1	-0.6	48.99	16.3652	5.22927	3.12954	16.3652	0.720658	0	0	0.7092	0.9841	0	Cu
16	EBAVAH_auto	0	0	0	0	361.76	262	397		0	0	0	15.4	-0.8	46.49	14.11	7.45371	1.89302	14.0269	0.571355	0	0	0.776	1.35818	0	Cu
16	NIGDEO_clean	0	0	0	0	352.43	223	400		0	0	0	15.51	-0.4	47.79	13.9402	7.42068	1.87856	13.9262	0.633535	0	0	0.7538	1.18983	0	Cu
12	c6ce00407e_c6ce00407e1_clean	0	0	0	0	350.59	213	390		0	0	0	17.11	-2.7	50.59	15.7759	8.21654	1.92001	15.7613	0.595584	0	0	0.7746	1.30057	0	Cu
24	DOPHOH_clean	0	0	0	0	349.75	250	392		0	0	0	21.05	0.29	59.59	12.1258	5.64086	2.14963	12.1258	0.985409	390.474	396.256	0.664	0.673832	0	Cu
20	GAMXAV_clean	0	0	0	0	345.49	223	389		0	0	0	18.81	0.29	46.29	12.8282	4.31562	2.9725	12.8282	0.868866	0	0	0.6754	0.777335	0	Cu
16	HOGLEV_clean	0	0	0	0	341.9	243	383		0	0	0	17.37	-0.1	53.69	14.034	9.0463	1.55135	14.0231	0.76193	0	0	0.7494	0.983555	0	Cu
21	AWAHAI_clean	0	0	0	0	340.59	173	418		0	0	0	10.98	-0.3	18.99	12.7414	3.10347	4.10554	12.7414	2.97237	1275.62	429.158	0.5854	0.196947	0	Mn,U
15	FAMPUH_clean	0	0	0	0	325.13	241	361		0	0	0	15.79	-0.8	49.39	14.2973	6.50644	2.1974	14.2973	0.67257	0	0	0.7568	1.12524	0	Cu
17	FAMQES_clean	0	0	0	0	313.64	233	347		0	0	0	16.14	-0.9	50.49	13.9231	6.55268	2.1248	13.9231	0.674226	0	0	0.7532	1.11713	0	Cu
17	RAYFEE_clean	0	0	0	0	308.05	221	344		0	0	0	23.36	0.19	52.89	13.8756	10.0361	1.38257	13.8756	0.965847	0	0	0.7062	0.731172	0	Cu
21	LEVDIB_clean	0	0	0	0	307.3	219	343		0	0	0	15.23	-0.8	52.29	12.8102	4.05785	3.1569	12.6765	0.771367	0	0	0.6982	0.905146	0	Cu
22	HUJGEA_clean	0	0	0	0	304.72	237	336		0	0	0	16.1	-0.1	47.89	12.5394	4.7914	2.61707	12.4029	0.822662	0	0	0.7056	0.857703	0	Cu
24	EBATUZ_clean	0	0	0	0	300.08	238	337		0	0	0	16.19	-0.1	48.09	12.2181	7.03158	1.7376	12.2181	0.59675	0	0	0.7812	1.30909	0	Cu
23	KISVEO_clean	0	0	0	0	299.77	192	347		0	0	0	16.7	-1.1	30.69	12.3701	6.46344	1.91386	11.8065	2.21622	0	0	0.6734	0.303851	0	U
22	MIXBEC_clean	0	0	0	0	296.91	223	332		0	0	0	16.18	-7.8	50.09	12.4058	6.44619	1.92452	12.4053	0.643237	0	0	0.758	1.17841	0	Cu
23	BOYCEY_auto	0	0	0	0	295.71	223	334		0	0	0	16.17	-1.7	47.59	12.3721	6.12785	2.019	11.7671	0.613909	0	0	0.7532	1.22689	0	Cu
16	CAJQEL_clean	0	0	0	0	289.81	211	322		0	0	0	15.89	-0.3	47.69	13.9366	8.23046	1.6933	13.9366	0.705662	0	0	0.7554	1.07048	0	Cu
16	FAMQAO_clean	0	0	0	0	287.16	223	324		0	0	0	16.8	-0.7	51.99	14.1997	6.54893	2.16825	14.1861	0.666736	0	0	0.7576	1.13628	0	Cu
15	YABHER_clean	0	0	0	0	281.45	206	318		0	0	0	16.36	-1.6	48.39	14.3729	4.52414	3.17694	14.3729	0.692157	0	0	0.7082	1.02318	0	Cu
22	REWLEM_clean_h	0	0	0	0	277.16	187	318		0	0	0	16.09	-0.1	47.89	12.4698	5.92009	2.10636	12.2403	0.703058	0	0	0.7184	1.02182	0	Cu,Zn
23	WOYJIF_clean	0	0	0	0	277	202	316		0	0	0	16.18	-1	45.69	12.3325	5.92345	2.08198	11.4346	0.799114	0	0	0.716	0.895992	0	Cu
21	EPISOM_clean	0	0	0	0	271.17	207	307		0	0	0	16.7	-0.2	49.09	12.6394	6.49016	1.94747	12.6241	0.677616	0	0	0.7494	1.10594	0	Cu
24	KIJRUS_clean	0	0	0	0	270.09	190	298		0	0	0	17.51	-0.7	59.59	12.1419	7.10734	1.70836	11.6091	0.697914	0	0	0.7064	1.01216	0	Cu
22	WOYJOL_clean	0	0	0	0	265.2	198	295		0	0	0	16.59	0.6	45.19	12.521	5.76234	2.1729	12.521	0.820913	0	0	0.7178	0.874392	0	Cu
18	MEFJUE_clean	0	0	0	0	264.12	189	295		0	0	0	19.32	-1	58.09	13.6466	4.52582	3.01528	13.6466	0.969419	0	0	0.6876	0.709291	0	Cu,Zn
11	WAMREJ_clean	0	0	0	0	263.2	191	301		0	0	0	15.88	-0.1	47.99	15.9383	10.4935	1.51887	15.9383	0.575196	0	0	0.7842	1.36336	0	Cu
18	LAQNID_clean	0	0	0	0	261.23	183	301		0	0	0	16.69	-2.7	48.79	13.5144	6.53331	2.06854	13.5144	0.653619	0	0	0.7516	1.1499	0	Cu
17	OKABEI_clean	0	0	0	0	250.46	179	285		0	0	0	17.57	-0.6	49.09	13.8699	9.42284	1.47194	13.8699	0.653017	0	0	0.7686	1.177	0	Cu
23	BIPKIW_clean	0	0	0	0	235.76	148	285		0	0	0	20.32	-0.8	55.99	12.3845	3.37218	3.67256	12.3845	1.0068	240.625	239	0.5528	0.549067	0	Cu,Si
20	FUTTIZ_clean	0	0	0	0	229.46	155	279		0	0	0	7.06	-2.1	12.69	12.856	4.31062	2.9824	12.856	0.737111	0	0	0.7318	0.992795	0	Zn
12	MIVFOO_clean	0	0	0	0	221.95	132	263		0	0	0	8.64	-0.6	15.79	15.5954	7.18908	2.16932	15.5954	1.05942	437.579	413.035	0.6586	0.621658	0	Mn
13	BOWNUY_clean	0	0	0	0	213.76	136	245		0	0	0	26.02	-0.1	45.99	15.5271	9.99848	1.55295	15.5054	0.770284	449.917	584.092	0.7344	0.953414	0	Cu
22	MOYYIJ_clean	0	0	0	0	208	147	235		0	0	0	17.95	-0.3	53.09	12.4205	9.37645	1.32465	12.4205	0.730593	0	0	0.7162	0.980299	0	Cu
20	CUVHIL_clean_h	0	0	0	0	207.83	124	241		0	0	0	17.77	-1.3	32.89	12.8761	12.0325	1.07011	12.8761	1.65921	0	0	0.643	0.387534	0	Nd
21	cg400449c_si_001_clean	0	0	0	0	207.7	167	232		0	0	0	16.3	-0.7	50.69	12.6579	7.41339	1.70744	12.4371	0.667569	0	0	0.7554	1.13157	0	Cu
23	ASIVAB_clean	0	0	0	0	204.22	252	227		0	0	0	16.59	-0.7	53.59	12.3213	7.27063	1.69467	11.9462	0.538243	0	0	0.795	1.47703	0	Cu
17	cg301577a_si_002_clean	0	0	0	0	202.78	119	229		0	0	0	22.18	-1.1	59.59	13.7962	7.99146	1.72636	13.4748	0.563648	0	0	0.7834	1.38987	0	Cu
13	GADNUX_clean	0	0	0	0	197.47	145	217		0	0	0	16.97	-0.7	53.99	15.4379	6.70397	2.3028	14.7702	0.729552	0	0	0.7494	1.02721	0	Cu
17	UKIQOV_clean	0	0	0	0	197.19	161	221		0	0	0	16.69	-0.4	49.69	13.6671	9.63813	1.41803	13.6601	0.628902	0	0	0.7776	1.23644	0	Cu,Co
20	CUVHIL01_clean	0	0	0	0	196.66	123	228		0	0	0	19.41	0.19	33.79	12.865	12.0222	1.0701	12.8497	1.66038	0	0	0.642	0.386658	0	Nd
25	LUYHAP_clean	0	0	0	0	192.73	159	212		0	0	0	16.52	-0.7	45.99	12.0562	6.74493	1.78745	12.056	0.618537	0	0	0.7716	1.24746	0	Cu
20	DICKEH_clean	0	0	0	0	191.32	154	216		0	0	0	16.83	-0.8	49.59	12.8399	7.4101	1.73275	12.6886	0.522471	0	0	0.796	1.52353	0	Cu
17	ANUGIA_clean	0	0	0	0	190.24	149	211		0	0	0	17	-0.2	52.29	13.8531	6.75838	2.04976	13.8531	0.567973	0	0	0.7948	1.39936	0	Cu
22	NAHNES_clean	0	0	0	0	187.97	124	221		0	0	0	14.31	-1.1	50.59	12.5291	11.4526	1.094	12.5291	0.578749	0	0	0.7668	1.32493	0	Cu
18	LIKGUJ_clean	0	0	0	0	186.19	141	207		0	0	0	15.35	-1	40.39	13.5559	7.04166	1.9251	13.5559	1.03126	0	0	0.6824	0.661717	0	Cu
24	AYOQEM_clean	0	0	0	0	185.76	142	204		0	0	0	18.3	0.09	53.89	12.1645	6.87343	1.76979	12.1645	0.774775	0	0	0.7066	0.912006	0	Cu
12	AQOMAW_clean	0	0	0	0	178.82	93	224		0	0	0	9.97	-1.1	17.09	15.6595	6.23259	2.51252	15.6595	1.14479	389.885	340.573	0.648	0.566042	0	Co
13	YAVWUQ_clean	0	0	0	0	174.29	148	197		0	0	0	14.97	0.49	53.79	15.486	6.62234	2.33844	15.4779	0.747785	0	0	0.7402	0.989857	0	Cu
20	EBAMUS_clean	0	0	0	0	172.91	137	193		0	0	0	28.2	-0.3	66.49	12.9445	5.39251	2.40046	12.9279	1.04643	0	0	0.6866	0.656136	0	Cu
19	YOZNAE_clean	0	0	0	0	161.44	134	177		0	0	0	18.03	-0.3	42.89	13.2791	6.70029	1.98186	13.2671	0.882932	0	0	0.7122	0.80663	0	Cu
25	UMOVID_clean	0	0	0	0	159.96	131	185		0	0	0	16.92	-0.7	54.39	12.0832	6.02223	2.00644	11.7752	0.495095	0	0	0.7958	1.60737	0	Cu
13	RULXOM_clean	0	0	0	0	156.65	78	189		0	0	0	9.63	-0.6	23.79	15.3697	3.55595	4.32225	15.3697	0.839199	0	0	0.652	0.776931	0	Fe
25	UMODEH18_clean	0	0	0	0	155.91	127	176		0	0	0	17.35	-7.8	54.89	12.0734	5.35338	2.25528	12.0734	0.527677	0	0	0.7746	1.46794	0	Cu
22	UMOBEF_clean	0	0	0	0	155.57	120	177		0	0	0	16.87	-0.6	52.59	12.498	6.04018	2.06914	12.4261	0.48038	0	0	0.7972	1.65952	0	Cu
22	UMOVOJ_clean	0	0	0	0	155	127	0		0	0	17.1	-0.8	53.99		12.4493	6.04966	2.05785	11.6446	0.481059	0	0	0.8008	1.66466	0	Cu
21	c4ce00408f_c4ce00408f2_clean	0	0	0	0	153.46	122	174		0	0	0	29.21	0.09	66.89	12.6276	5.23882	2.41039	12.6276	1.04827	210.803	201.096	0.6818	0.650406	0	Cu
21	POBNEA_clean	0	0	0	0	149.27	89	190		0	0	0	11.24	-0.2	20.99	12.6133	10.849	1.16263	12.6133	0.646582	2.26513	3.50323	0.7374	1.14046	0	Li,Co
15	KIYTOD_clean	0	0	0	0	147.61	113	165		0	0	0	16.17	0.39	49.09	14.3875	6.75209	2.13082	13.5703	0.794229	0	0	0.7144	0.899489	0	Cu,Ni
25	APARAM_clean	0	0	0	0	145.9	111	173		0	0	0	8.94	-0.5	15.09	12.0009	11.0631	1.08477	12.0009	0.965457	99.7383	103.307	0.6016	0.623124	0	Mn
19	DUGMOJ_clean	0	0	0	0	144.76	105	161		0	0	0	16.76	0.29	52.89	13.1595	6.68014	1.96994	13.1595	1.04413	0	0	0.5972	0.571957	0	Cu
7	CUQSAK_clean	0	0	0	0	134.4	91	158		0	0	0	11.91	-0.5	24.19	18.3005	4.50008	4.0667	17.8654	0.672661	0.138515	0.205922	0.7088	1.05373	0	Cu
19	ELERIY_clean	0	0	0	0	132.67	88	151		0	0	0	14.55	0.29	40.89	13.0687	6.51652	2.00548	13.0677	0.765708	0	0	0.7112	0.928814	0	Cu
21	ADOGEH_clean	0	0	0	0	131.52	108	153		0	0	0	21.54	0.29	48.19	12.7145	5.05258	2.51643	12.6997	1.01991	0	0	0.677	0.663783	0	Cu
14	BETGOY_clean	0	0	0	0	127.37	81	154		0	0	0	11.24	-0.3	18.39	15.1649	5.42937	2.79313	15.1649	1.28137	401.433	313.284	0.472	0.368356	0.11956	Co
24	EQUNIP_clean	0	0	0	0	127.01	80	161		0	0	0	9.11	-0.4	17.69	12.1968	4.3543	2.8011	12.195	0.882362	0	0	0.7004	0.793779	0	In
16	MUNDOQ_clean	0	0	0	0	124.21	106	138		0	0	0	15.92	-0.7	55.99	14.169	13.3498	1.06136	14.0675	0.845802	0	0	0.7752	0.916526	0	Cu
23	ASINIB_clean	0	0	0	0	119.8	89	149		0	0	0	17.42	-1.4	62.59	12.4005	7.22634	1.71602	12.4005	0.666065	0	0	0.713	1.07047	0	Cu
15	PACZOK_clean	0	0	0	0	119.68	77	140		0	0	0	10.33	-7.8	18.09	14.4226	6.94223	2.07752	14.4102	1.08844	0	0	0.7086	0.651024	0	V
23	ADARAA_clean	0	0	0	0	118.62	85	148		0	0	0	7.56	-1.3	15.59	12.292	5.40077	2.27598	12.292	0.881935	7.83761	8.88684	0.6948	0.787813	0	Co
25	XEBHOC_clean	0	0	0	0	117.19	93	139		0	0	0	17.38	-1.3	49.99	12.082	9.91355	1.21874	12.0647	0.465059	0	0	0.813	1.74817	0	Cu
16	BETGIS_clean	0	0	0	0	116.88	41	169		0	0	0	13.09	-0.8	23.59	14.0028	4.06192	3.44733	14.0028	1.35807	450.295	331.571	0.6224	0.458298	0	Ni
18	MUNDEG_clean	0	0	0	0	115.16	99	136		0	0	0	16.32	-0.9	54.79	13.4484	12.6512	1.06302	13.4346	0.869875	0	0	0.7658	0.880357	0	Cu
21	FUQJUX_clean	0	0	0	0	111.06	90	126		0	0	0	15.2	-1.5	30.79	12.6972	8.47633	1.49796	12.6514	0.718278	0	0	0.7464	1.03915	0	Cu
15	ZAZNUL_clean	0	0	0	0	109.43	82	131		0	0	0	8.29	-0.4	15.99	14.3322	5.62688	2.54709	14.3322	1.14775	309.364	269.539	0.6388	0.556566	0	Al
10	QOWRAV02_clean	0	0	0	0	105.8	89	120		0	0	0	17.03	-0.5	48.79	16.406	5.24588	3.1274	16.3993	0.71711	0	0	0.7138	0.995384	0	Cu
15	SETPEO_clean	0	0	0	0	105.5	70	125		0	0	0	12.33	-1.5	22.19	14.4705	3.66339	3.95002	14.4684	0.794221	0	0	0.7298	0.918888	0	In
9	HIYGIH_clean	0	0	0	0	101.38	86	114		0	0	0	18.03	-0.8	56.79	17.0695	6.66429	2.56134	17.0695	0.730619	0	0	0.7424	1.01613	0	Cu
24	DOPHUN_clean	0	0	0	0	99.9	84	109		0	0	0	20.53	-7.8	58.19	12.1335	5.61514	2.16086	12.1335	0.984545	392.743	398.909	0.6676	0.67808	0	Cu
10	SOVLEW_clean	0	0	0	0	96.22	83	111		0	0	0	17.46	0.09	57.39	16.7899	6.64048	2.52842	16.7899	0.755158	0	0	0.742	0.982576	0	Cu
23	PAMTOO_clean	0	0	0	0	87.98	54	108		0	0	0	10.11	-0.5	18.79	12.3515	5.62136	2.19725	12.3515	0.923606	0	0	0.7096	0.768293	0	Dy
10	XALXUF_clean	0	0	0	0	86.71	72	100		0	0	0	18.92	-7.81	54.29	16.2966	6.6292	2.4583	16.0315	0.78852	0	0	0.7412	0.939989	0	Cu
23	PAMTUU_clean	0	0	0	0	85.25	45	107		0	0	0	10.45	-1	19.89	12.4009	5.62514	2.20454	12.4009	0.908425	0	0	0.6952	0.76528	0	Tb
24	PAMTII_clean	0	0	0	0	84.05	50	100		0	0	0	9.48	-3.5	18.39	12.14	5.49468	2.20941	12.1397	0.953828	0	0	0.7082	0.742482	0	Er
21	QAGDIO_clean	0	0	0	0	82.4	64	98		0	0	0	15.84	-1	50.99	12.8105	10.0847	1.27028	12.7958	0.728225	0	0	0.7164	0.983763	0	Cu
17	ENIHUG01_clean	0	0	0	0	80.94	64	94		0	0	0	16.17	-1.4	51.99	13.7857	6.83219	2.01775	13.781	0.585033	0	0	0.7686	1.31377	0	Cu
22	MAYKOO_clean	0	0	0	0	77.44	58	96		0	0	0	15.21	-1.7	50.89	12.5822	11.5029	1.09383	12.5697	0.603307	0	0	0.7608	1.26105	0	Cu
14	BETGEO_clean	0	0	0	0	77.14	39	101		0	0	0	9.65	-0.4	15.09	15.2158	5.06222	3.00575	15.2158	1.31768	381.116	289.233	0.6412	0.486614	0	Ni
17	ENIHUG_clean	0	0	0	0	76.89	65	91		0	0	0	16.59	-0.8	50.39	13.8207	6.83124	2.02316	13.8201	0.581484	0	0	0.7906	1.35962	0	Cu
13	ZIMTAS_clean	0	0	0	0	72.55	54	90		0	0	0	25.06	-0.2	50.59	15.448	6.02893	2.56231	15.448	0.579498	0	0	0.7752	1.33771	0	Cu,Si
11	BETHEP_clean	0	0	0	0	71.69	44	96		0	0	0	7.56	-1.2	13.49	15.9397	5.38602	2.95946	15.9397	1.55026	479.733	309.453	0.6876	0.443538	0	Cd
19	UVEVUN_clean	0	0	0	0	70.62	56	86		0	0	0	14.31	-0.6	41.19	13.0863	6.53433	2.00271	13.0863	0.765991	0	0	0.7048	0.920115	0	Cu
11	POBMOJ01_clean	0	0	0	0	70.25	51	92		0	0	0	7.75	-0.9	15.19	16.0903	3.85233	4.17677	16.0903	1.0369	0	0	0.67	0.64616	0	Yb
14	WAVRAO_clean	0	0	0	0	67.49	37	89		0	0	0	8.88	-1.7	16.69	15.0227	4.23694	3.54566	15.0205	0.819731	0	0	0.6752	0.823685	0	In,Mn
23	XUDNUH_clean	0	0	0	0	65.23	50	81		0	0	0	16.51	-0.6	49.89	12.3613	6.84234	1.80659	12.3613	0.492653	0	0	0.8076	1.63929	0	Cu
18	GUHMIH_clean	0	0	0	0	64.25	47	80		0	0	0	18.09	-0.7	43.89	13.3149	6.32995	2.10348	13.3149	0.498432	0	0	0.778	1.5609	0	Cu
17	LUXFOA_clean	0	0	0	0	58.78	38	76		0	0	0	9.52	-1.1	17.59	13.7395	4.3179	3.18198	13.7395	0.952497	15.1519	15.9076	0.6722	0.705724	0	Mn
13	SENVIR_clean	0	0	0	0	51.06	26	79		0	0	0	6.86	-1.8	15.99	15.3734	3.88956	3.95249	15.3734	0.850165	0	0	0.6596	0.77585	0	Co
5	XOFGAC_clean	0	0	0	0	50.59	31	70		0	0	0	10.04	-1	19.19	20.2849	4.16314	4.8725	9.48492	0.98367	0	0	0.6704	0.681529	0	Eu
6	UZAROE_clean	0	0	0	0	45.76	32	61		0	0	0	7.77	-0.6	14.89	19.5454	7.16489	2.72794	19.5454	0.922216	0	0	0.6638	0.719788	0	Co
17	LUXFUG_clean	0	0	0	0	45.73	27	63		0	0	0	8.23	-1.1	16.19	13.7104	4.29007	3.19585	13.7104	1.01438	11.1798	11.0213	0.6608	0.651434	0	Co
25	AVIVUW_clean	0	0	0	0	43.99	26	62		0	0	0	6.46	-0.9	11.69	12.0408	6.91892	1.74027	12.0408	0.729779	127.81	175.136	0.7162	0.981393	0	Ag
24	QAVBUL_clean	0	0	0	0	43.62	27	58		0	0	0	12.59	-0.2	20.69	12.1478	9.97355	1.218	12.1478	1.03126	0	0	0.626	0.607023	0	Tb
16	ic402692p_si_004_clean	0	0	0	0	43.12	23	69		0	0	0	7.76	-0.8	14.89	14.0627	4.49755	3.12675	14.0627	0.931261	0	0	0.6974	0.748877	0	Zn
17	YEKQOW_clean	0	0	0	0	42.67	33	57		0	0	0	8	-0.2	13.69	13.7102	3.97085	3.4527	13.7102	1.23134	0	0	0.6056	0.491823	0	Zn
14	PIJJEZ_clean	0	0	0	0	35.67	20	57		0	0	0	6.46	-2.5	12.99	14.7539	5.96588	2.47306	14.7539	0.935418	0	0	0.656	0.70129	0	Cd
13	KUCDIW_clean	0	0	0	0	35.13	18	46		0	0	0	11.89	-0.3	20.59	15.3296	4.28733	3.57555	15.1472	0.82417	0	0	0.6424	0.779451	0	Cu
21	c5dt03091a_c5dt03091a2_clean	0	0	0	0	33.75	17	52		0	0	0	10.3	1.2	18.49	12.7076	7.22422	1.75902	12.6291	0.840959	0	0	0.7324	0.87091	0	Er
24	RUYVEO_clean	0	0	0	0	31.86	22	43		0	0	0	13.87	-0.6	24.99	12.213	10.1222	1.20656	12.213	0.962787	0	0	0.6354	0.659959	0	La
18	MEFJOY_clean	0	0	0	0	28.67	9	49		0	0	0	4.38	-1.5	10.49	13.3554	4.52002	2.95473	13.2824	0.978068	0	0	0.6982	0.713857	0	Zn
24	XALTOV_clean	0	0	0	0	28.49	14	41		0	0	0	7.18	-1.7	13.89	12.1705	3.00948	4.04404	12.1677	1.10281	1597.06	1448.18	0.6382	0.578705	0	Co
17	LUXDUE_clean	0	0	0	0	27.41	10	43		0	0	0	6.88	-1.4	14.79	13.6894	4.23916	3.22928	13.6894	1.04302	13.4841	12.9279	0.692	0.663456	0	Zn
11	MIHHER_clean	0	0	0	0	26.72	14	40		0	0	0	7.27	-1.1	14.89	15.9185	2.85919	5.5675	15.8633	1.00757	1338.82	1328.76	0.605	0.600454	0	Co
18	XASNUD_clean	0	0	0	0	26.65	11	45		0	0	0	4.28	-2.1	10.69	13.5188	4.58024	2.95154	13.5188	0.967914	0	0	0.6906	0.713493	0	Zn
18	RUPVAB_clean	0	0	0	0	26.44	8	49		0	0	0	4.2	-1.8	4.89	13.6174	4.61754	2.94906	13.6174	0.953237	0	0	0.6886	0.722381	0	Zn
12	COCMOY_clean	0	0	0	0	26.07	15	42		0	0	0	8.33	-1.7	15.09	15.7132	6.14739	2.55607	15.7132	0.538882	0	0	0.7762	1.44039	0	Mn,Si
25	MINCUJ_clean	0	0	0	0	26.02	19	37		0	0	0	11.02	-0.9	21.19	12.0128	7.57315	1.58624	11.9429	0.692877	0	0	0.7558	1.09081	0	Tb
10	XUFYAA_clean	0	0	0	0	24.6	13	41		0	0	0	7.37	-1.4	14.79	16.8024	4.60613	3.64783	16.7749	0.589197	0	0	0.7212	1.22404	0	Mg
22	PEZCII_clean	0	0	0	0	23.57	18	33		0	0	0	13.64	-0.8	22.19	12.5056	10.1886	1.22741	12.5056	0.9535	0	0	0.6362	0.667226	0	La
20	ic5b01023_si_002_clean	0	0	0	0	23.31	9	41		0	0	0	4.53	-3.9	10.09	12.8128	3.94057	3.2515	12.8128	0.929822	0	0	0.6134	0.659696	0	Zn
18	acs.inorgchem.6b02413_ic6b02413_si_002_clean	0	0	0	0	19.58	11	30		0	0	0	8.01	-1.8	13.49	13.3773	6.88163	1.94392	13.3773	0.804279	0	0	0.74	0.920079	0.00124335	Tb
19	FAYQAZ_clean	0	0	0	0	19.56	5	38		0	0	0	5.35	-1.4	11.99	13.2509	5.37829	2.46378	12.958	0.797039	0	0	0.6806	0.85391	0	Zn
25	OZUKUR01_clean	0	0	0	0	19.17	10	30		0	0	0	7.34	-1.2	13.59	12.0031	11.2085	1.07089	12.0031	1.04914	0	0	0.6712	0.639764	0	Mn
10	DIBQEM_clean	0	0	0	0	18.85	6	35		0	0	0	4.28	-1.6	10.09	16.8285	3.4822	4.83271	16.8285	0.80886	0	0	0.6836	0.84514	0	Co
9	NIGNUO_clean	0	0	0	0	18.67	6	37		0	0	0	4.32	-1.6	10.59	16.8891	3.72632	4.53237	16.8891	0.773731	0	0	0.6948	0.897987	0	Co
21	FIFGIM_clean	0	0	0	0	17.64	10	30		0	0	0	8.33	-0.8	15.09	12.6449	7.03976	1.79622	9.83966	0.68535	0	0	0.7642	1.11505	0	In,Zn
18	BINCUY_manual	0	0	0	0	17.31	5	37		0	0	0	4.29	-1.9	10.19	13.3117	8.62623	1.54317	13.3117	0.583969	0	0	0.7246	1.24082	0	Co
25	XALBAO_clean	0	0	0	0	16.83	2	32		0	0	0	5.03	-1.3	10.69	12.0897	7.27048	1.66285	11.7893	0.880979	0	0	0.6308	0.716022	0	Mn
18	EVAKIV_clean	0	0	0	0	16.28	1	34		0	0	0	3.96	-1.1	9.79	13.3499	4.00312	3.33487	13.3499	0.730238	0	0	0.6852	0.938325	0	Cu
24	ja500330a_si_006_auto	0	0	0	0	16.21	5	32		0	0	0	7.22	-1.2	14.59	12.2058	6.15217	1.98399	12.2058	0.793444	0	0	0.7068	0.8908	0.000252066	Zr
21	ic502254c_si_002_clean	0	0	0	0	15.84	4	30		0	0	0	4.66	-2.1	10.89	12.6821	7.60887	1.66675	12.6821	0.711281	0	0	0.7144	1.00439	0	Zn
20	LAFRER_manual	0	0	0	0	15.45	2	39		0	0	0	4.32	-1.7	10.59	13.0544	5.12975	2.54485	13.0544	0.705732	0	0	0.696	0.986211	0	Co
23	XALBUI_clean	0	0	0	0	15.31	4	33		0	0	0	4.97	-2.1	10.69	12.3873	7.83288	1.58145	12.2559	0.880388	0	0	0.6108	0.693785	0	Mn
20	ALICAA_clean	0	0	0	0	14.79	5	28		0	0	0	5.48	-1.2	10.29	12.9879	3.46699	3.74615	12.9879	1.43218	203.647	142.194	0.5692	0.397436	0	W,Zn
22	RIVDEH_clean	0	0	0	0	14.42	2	32		0	0	0	4.15	-1.6	10.29	12.5192	5.05893	2.47468	12.5117	0.722936	0	0	0.6838	0.945866	0	Co
20	RIVDIL_clean	0	0	0	0	14.39	2	31		0	0	0	4.19	-1.1	10.19	12.9952	5.18013	2.50866	12.983	0.711583	0	0	0.6832	0.960112	0	Co
17	VEHKIE_SL	0	0	0	0	14.02	1	31		0	0	0	4.33	-2.2	11.49	13.7712	4.50888	3.05425	13.7712	0.959384	0	0	0.6924	0.721713	0	Zn
24	XALBOC_clean	0	0	0	0	13.83	3	30		0	0	0	4.97	-2	10.59	12.1616	7.7526	1.56871	11.8751	0.87192	0	0	0.6178	0.708551	0	Mn
22	NERVAJ_clean	0	0	0	0	13.77	4	28		0	0	0	5.93	-0.8	11.29	12.5344	5.46518	2.29351	12.5344	1.01277	0	0	0.569	0.561827	0	Zn
18	NASROR_clean	0	0	0	0	13.69	2	29		0	0	0	4.6	-1.7	10.29	13.4523	4.98216	2.70009	13.4523	0.776126	0	0	0.7	0.901915	0	Zn
18	FEWWUB_clean	0	0	0	0	13.59	3	26		0	0	0	6.19	-0.4	12.29	13.4629	4.10343	3.2809	6.99036	0.839472	374.213	445.771	0.6142	0.731651	0	Fe
13	MIHHIV_clean	0	0	0	0	13.41	4	30		0	0	0	6.06	-0.8	12.29	15.2984	2.91098	5.25541	15.2984	1.00756	1281.4	1271.78	0.6084	0.603834	0	Zn
23	NERVEN_clean	0	0	0	0	12.25	2	26		0	0	0	5.75	-1.9	12.39	12.2514	5.76203	2.12623	12.2514	1.08035	0	0	0.5706	0.528164	0	Cd
16	AXUBAW_manual	0	0	0	0	12.22	2	28		0	0	0	4.88	-2.5	10.89	14.2457	5.52422	2.57877	14.2339	0.741721	0	0	0.7126	0.960739	0	Zn
22	LAFROB_manual	0	0	0	0	12.04	1	26		0	0	0	3.89	-2.7	11.79	12.5028	5.7361	2.17966	12.5028	0.712849	251.853	353.304	0.6904	0.968508	0	Co
19	KULMEK_clean	0	0	0	0	11.96	1	27		0	0	0	4.84	-1.5	10.59	13.2104	7.45311	1.77247	13.2086	0.659951	0	0	0.7544	1.14311	0	Zn
8	ic5b00535_si_002_clean	0	0	0	0	11	3	23		0	0	0	4.9	-2.1	8.79	17.8828	5.61829	3.18296	17.8828	0.59819	0	0	0.749	1.25211	0.000668684	Zr
22	KARLUM_clean	0	0	0	0	10.98	1	27		0	0	0	3.5	-2.6	9.19	12.5342	7.4934	1.67269	12.5342	0.637007	0	0	0.7386	1.15949	0	Ni
22	KUJNEJ_clean	0	0	0	0	10.84	1	26		0	0	0	3.51	-1.5	9.49	12.5183	7.61249	1.64445	12.513	0.637007	0	0	0.739	1.16011	0	Ni
24	HOLQIK_clean	0	0	0	0	10.64	1	21		0	0	0	5.92	-0.8	11.59	12.1081	3.4458	3.51387	10.1604	0.913109	0	0	0.663	0.726091	0	Zn
11	NAMDUD_clean	0	0	0	0	9.96	6	20		0	0	0	8.56	-1.5	15.99	16.0348	3.9849	4.0239	16.0305	0.771409	0	0	0.674	0.873726	0	Mn
25	WOYHUP_clean	0	0	0	0	9.72	0	24		0	0	0	4.23	-2.2	9.99	12.0458	5.92239	2.03395	11.9232	0.785656	0	0	0.7288	0.927633	0	Zn
20	ETAXUT_clean	0	0	0	0	9.44	0	30		57.19	29.49	74.79	5.43	-1.4	12.29	12.8936	7.93773	1.62434	12.8936	0.721487	77.994	108.102	0.7242	1.00376	0	Zn
11	EZOFOP_clean	0	0	0	0	9.43	1	25		0	0	0	5.52	-3	10.89	16.0973	3.03368	5.3062	16.0973	0.822613	1664.63	2023.58	0.655	0.796243	0	Ni
24	XALCAP_clean	0	0	0	0	8.59	0	22		0	0	0	5.06	-0.8	11.69	12.1402	7.5095	1.61665	12.1402	0.892504	0	0	0.6302	0.706103	0	Mn
24	XALBIW_clean	0	0	0	0	8.3	0	22		0	0	0	4.98	-1.3	11.09	12.1422	7.80534	1.55562	11.9932	0.869373	0	0	0.6226	0.716148	0	Mn
20	RIFDUG01_clean	0	0	0	0	7.69	0	22		0	0	0	4.5	-1.4	11.39	13.0054	6.82625	1.90521	13.0054	0.86753	0	0	0.7198	0.829712	0	Zn
18	YUVGOL_SL	0	0	0	0	7.58	0	20		0	0	0	4.23	-3.3	9.39	13.518	2.67027	5.06242	13.518	0.92623	1099.23	1186.78	0.616	0.665062	0	Zn
24	XALBES_clean	0	0	0	0	7.44	0	19		0	0	0	5	-2.2	10.29	12.0986	7.46549	1.6206	12.0986	0.882372	0	0	0.6194	0.701971	0	Mn
23	MEGFIN_clean	0	0	0	0	7.1	0	20		0	0	0	4.94	-0.3	10.49	12.2602	8.11803	1.51024	12.2601	0.845073	0	0	0.644	0.762064	0	Mn
24	XAKZUF_clean	0	0	0	0	7.01	0	18		0	0	0	4.96	-1.9	10.69	12.1469	7.7394	1.56948	12.1469	0.885336	0	0	0.616	0.695781	0	Mn
21	LIQDAS_clean	0	0	0	0	6.3	0	18		0	0	0	4.23	-2.3	9.59	12.8039	5.86346	2.18368	12.8039	0.732254	0	0	0.725	0.990093	0	Zn,Ti
23	WOYJEB_clean	0	0	0	0	5.79	0	17		0	0	0	4.57	-1.5	11.29	12.328	5.95231	2.07113	12.3029	0.80227	0	0	0.7248	0.903436	0	Zn
12	SUVNEE_clean	0	0	0	0	5.71	0	21		0	0	0	5.2	-2.1	12.49	15.6562	6.95834	2.24999	15.6562	0.815704	314.611	385.692	0.6944	0.851289	0	Ni
16	NUBBAP_clean	0	0	0	0	5.42	0	18		0	0	0	2.76	-2	8.19	14.0542	6.66438	2.10885	11.1062	0.762781	0	0	0.7708	1.01051	0	Zn
13	MIHHAN_SL	0	0	0	0	5.22	0	16		0	0	0	4.91	-1.7	9.49	15.2577	2.90995	5.24327	15.2116	1.02947	1298.97	1261.79	0.6158	0.598174	0	Zn
19	TOVKEW_clean	0	0	0	0	5.16	0	16		0	0	0	4.42	-1.4	10.49	13.1524	8.94797	1.46988	13.1524	0.566631	0	0	0.7342	1.29573	0	Fe
16	VEHJOJ_clean	0	0	0	0	5	0	17		0	0	0	2.66	-2.4	9.19	14.0992	6.85678	2.05625	11.1945	0.748313	0	0	0.7708	1.03005	0	Zn
21	jinoche.2015.03.054_CIFs_clean	0	0	0	0	4.96	0	17		0	0	0	3.29	-2	9.59	12.6953	7.85866	1.61546	12.6953	0.704617	0	0	0.79	1.12118	0	Cd
15	VEHJUP_clean	0	0	0	0	4.94	0	16		0	0	0	2.65	-1.5	8.59	14.2807	6.83408	2.08963	11.2291	0.743695	0	0	0.7746	1.04156	0	Zn
21	WIZMAV02_auto	0	0	0	0	4.88	0	15		0	0	0	5.7	-1.3	12.09	12.745	5.77928	2.20529	12.745	0.733163	0	0	0.725	0.988866	0.00027279	Zr
14	VEJHEZ_clean	0	0	0	0	4.27	0	16		0	0	0	3.12	-1.6	8.39	15.0577	6.22214	2.42002	9.48846	0.685711	0	0	0.7706	1.1238	0	Zn
23	ZUZZEB_clean	0	0	0	0	4.17	0	14		0	0	0	4.38	-2.3	10.79	12.3842	6.8566	1.80617	12.3754	0.903178	0	0	0.7248	0.8025	0	Yb
24	HUYKOB_clean	0	0	0	0	3.95	0	14		0	0	0	5.22	-1.7	8.49	12.1174	9.13356	1.32669	12.1085	0.81232	19.6901	24.2393	0.6314	0.77728	0	Ni
15	BIBXUH_clean	0	0	0	0	3.95	0	13		0	0	0	3.3	-1	9.99	14.739	5.12647	2.87508	14.739	0.739806	0	0	0.7088	0.958089	0.00108136	Ni
25	XALCET_clean	0	0	0	0	3.89	0	14		0	0	0	4.99	-1.4	10.59	12.0955	7.67742	1.57546	12.0955	0.88783	0	0	0.6136	0.691123	0	Mn
24	acs.inorgchem.6b02696_ic6b02696_si_002_clean	0	0	0	0	3.85	0	14		0	0	0	4.53	-1.2	10.99	12.1312	5.0609	2.39705	12.1281	0.908718	0	0	0.6878	0.75689	0	Zn
9	cg900153m_si_001_clean	0	0	0	0	3.83	0	14		0	0	0	4.17	-2.7	10.99	16.9426	7.25585	2.33503	10.1115	0.592421	0	0	0.7834	1.32237	0	Zn
18	la4012839_si_002_auto	0	0	0	0	3.52	0	13		0	0	0	4.24	-1.9	9.99	13.3691	6.74856	1.98103	13.3691	0.867921	0	0	0.7182	0.827495	0	Zn
9	cg501231v_si_001_clean	0	0	0	0	2.87	0	11		0	0	0	3.43	-1.4	8.59	17.0677	7.18297	2.37614	17.0677	0.779609	0	0	0.6902	0.885316	0	Ag
9	YOZBAS_clean	0	0	0	0	2.59	0	11		0	0	0	3.41	-2.4	8.09	16.9443	7.02537	2.41187	16.9443	0.790688	0	0	0.6898	0.872405	0	Ag
10	ZINDAD_clean	0	0	0	0	2.26	0	12		0	0	0	3.8	-2.7	9.49	16.3928	6.7436	2.43086	16.3928	0.781296	0.0538053	0.0688667	0.7302	0.934601	0	Zn
14	EDUTIG_clean	0	0	0	0	2.25	0	12		0	0	0	3.64	-2	9.69	15.0496	5.6073	2.68393	15.0352	0.712902	0	0	0.7442	1.0439	0	Zn
23	ja903726m_si_002_clean	0	0	0	0	1.9	0	11		0	0	0	2.95	-1.3	9.49	12.2486	4.72993	2.5896	12.2486	0.820334	0	0	0.6832	0.832831	0	Ti
15	KUCDES_clean	0	0	0	0	1.88	0	11		0	0	0	4	-2.8	8.49	14.5665	4.11545	3.53946	14.5665	0.750237	570.594	760.551	0.617	0.822407	0	Li
21	GUPBUP_SL	0	0	0	0	1.63	0	10		0	0	0	3.13	-1.1	8.09	12.6903	3.67391	3.45417	12.6903	0.919646	0	0	0.6966	0.757465	0	Cd
12	c6ta00429f_c6ta00429f2_clean	0	0	0	0	1.61	0	9		0	0	0	3.34	-2.2	8.49	15.8689	5.53957	2.86465	7.79231	0.722489	0	0	0.6916	0.957247	0.000276821	Zr
1	NIBJAK_clean	0	0	0	0	0	0	0		0	0	0	0	0	0	32.0035	17.5517	1.82338	32.0003	0.223433	0	0	0.9102	4.0737	0	Cu
7	DOMCUE_clean	0	0	0	0	0	0	0		0	0	0	0	0	0	18.2501	13.5468	1.34719	18.2492	0.68587	0	0	0.7758	1.13112	0	Tb
19	YOCLIN_clean	0	0	0	0	0	0	0		0	0	0	0	0	0	13.2235	6.67449	1.98121	13.2235	0.8764	0	0	0.7206	0.822227	0	Cu
6	ja5b02999_si_007_clean				0											19.2415	15.8193	1.21633	18.1729	0.414726	0	0	0.8236	1.98589	0	Mn
10	QOWQUO_manual				0											16.3651	5.22924	3.12953	16.3651	0.720668	0	0	0.7092	0.984087	0	Cu

## Sheet: IVER-adsorbing MOFs
The MOFs structural properties were take from:
Y. G. Chung et al., “Computation-ready, experimental metal-organic frameworks: A tool to enable high-throughput screening of nanoporous crystals,” Chemistry of Materials, vol. 26, no. 21, pp. 6185–6192, Nov. 2014, doi: 10.1021/CM502594J/SUPPL_FILE/CM502594J_SI_002.XLSX.
Y. G. Chung et al., “Advances, Updates, and Analytics for the Computation-Ready, Experimental Metal-Organic Framework Database: CoRE MOF 2019,” J Chem Eng Data, vol. 64, no. 12, pp. 5985–5998, Dec. 2019, doi: 10.1021/ACS.JCED.9B00835/SUPPL_FILE/JE9B00835_SI_004.ZIP.
RANK	MOF_filename	IVER uptake (g/g)	Isosteric heats (kcal/mol)	LCD	PLD	LCD/PLD	All_Metals
1	BAZGAM_clean	3.2484	61.24	42.7982	24.2406	1.76556	Cu
2	XAHQAA_clean	2.37974	66.9	23.0353	21.6072	1.0661	Cu
3	UHUPOD01_clean	2.10887	57.37	33.0778	21.4039	1.54541	Zn
4	RAVXOD_clean	2.0907	52.45	71.6412	71.502	1.00195	Mg
5	XAHPUT_clean	2.03631	61.02	21.8281	20.5859	1.06034	Cu
6	AVAJUE_clean	1.9619	54.03	37.5257	19.5411	1.92035	Cu
7	QIYDIN_clean	1.71577	69.62	29.975	15.0225	1.99534	Cu
8	RAVXIX_clean	1.58257	57.53	53.5767	53.2643	1.00587	Mg
9	QIYDOT_clean	1.56219	64.47	19.8186	17.0636	1.16145	Cu
10	FOTNIN_clean	1.53504	59.94	33.6216	29.9295	1.12336	Zr
11	AVAKAL_clean	1.53204	65.31	26.2529	12.5751	2.08769	Cu
12	RUTNOK_manual	1.52594	62.53	24.6126	14.6485	1.68022	Zn
13	UNUNEY_clean	1.49521	55.38	34.0067	17.6376	1.92808	U
14	CUSYAR_clean	1.21668	52.78	28.0134	12.18	2.29996	Zn
15	HEXVEM_clean	1.20589	76.53	28.4313	15.9175	1.78616	Cu
16	AVAKEP_clean	1.19752	61.85	25.1756	12.4937	2.01507	Cu
17	NIBHOW_clean	1.18879	74.71	27.5106	14.8846	1.84826	Cu
18	ADATEG_manual	1.18427	59.33	27.3378	13.339	2.04946	Cu
19	RUBDUP_clean	1.16551	62	21.0952	19.2468	1.09604	Zn
20	ECOKAJ_clean	1.15044	63.11	18.9972	17.5755	1.08089	Zn
21	jacs.6b08724_ja6b08724_si_014_clean	1.1137	61.52	28.056	26.5894	1.05516	Mg
22	RAVXAP_clean	1.07412	57.63	34.8596	34.3554	1.01468	Mg
23	ALEJAE_clean	1.07206	55.07	19.8654	14.5686	1.36358	In
24	RAVWUI_clean	1.05111	64.64	36.7876	36.4331	1.00973	Zn
25	jacs.6b08724_ja6b08724_si_009_clean	1.01815	69.03	28.3891	26.8915	1.05569	Co
26	HOHMEX_manual	0.942119	60.92	18.7842	14.8946	1.26114	Cu
27	XUKYEI_neutral	0.935277	55.78	13.1723	10.7585	1.22437	Cu
28	BIGZUO_clean	0.931818	54.26	21.7232	20.9879	1.03503	Ag,Cr
29	ja507269n_si_003_clean	0.92841	65.61	27.2094	25.5491	1.06498	Fe,Co
30	RAVWIW_clean	0.919566	62.46	30.7005	30.1441	1.01846	Mg
31	XAHPON_clean	0.91032	63.51	17.2951	15.3322	1.12803	Cu
32	BIHBAX_clean	0.90614	46.4	18.5744	17.5567	1.05797	Ag,Cr
33	RAVXET_clean	0.890607	55.55	38.2281	38.0665	1.00425	Mg
34	FEBXIV_clean	0.886415	65.91	17.2864	15.7464	1.0978	Cu
35	ja512973b_si_004_auto	0.884771	56.79	23.1345	12.211	1.89456	Zr
36	XONLES01_clean	0.882764	64.75	15.5522	13.9713	1.11316	Cu
37	ja512973b_si_005_auto	0.834137	51.69	25.2415	10.4959	2.4049	Zr
38	jacs.6b01663_ja6b01663_si_003_clean	0.82653	56.47	27.6264	19.6462	1.40619	Zr
39	PIBNUK01_clean	0.813614	66.64	15.3719	14.1834	1.0838	Zn
40	PIBNUK_clean	0.803418	68.7	15.3841	14.1862	1.08444	Zn
41	YODWOF_clean	0.800042	59.77	21.6034	14.6374	1.4759	Zn
42	ADATAC_clean	0.797625	57.73	26.3351	10.2764	2.56269	Zn
43	ZELROZ_manual	0.796802	57.35	16.9089	11.0684	1.52767	Zn
44	TOVKOG_clean	0.793669	55.53	22.8421	13.1462	1.73755	Fe
45	AXINAX01_clean	0.792937	66.98	19.4749	13.2777	1.46673	Co
46	GAGZEV_clean	0.775777	65.42	28.6652	11.5377	2.48448	Cu
47	RAVWOC_clean	0.741912	58.05	28.2177	27.5597	1.02388	Mg
48	ja403810k_si_002_clean	0.739509	56.1	24.1144	19.5628	1.23267	Zn
49	ADUROI_clean	0.723842	59.94	25.6855	17.1242	1.49995	Zn
50	PIBPIA_clean	0.720857	60.27	15.4937	14.2536	1.087	Cd
51	BAZGEQ_clean	0.706298	59.26	27.2403	13.9632	1.95087	Cu
52	OKUTEV_clean	0.697896	59.7	23.0646	12.9827	1.77656	Cu
53	ja507269n_si_002_clean	0.694051	60.69	27.3395	23.1844	1.17922	Fe
54	AWUPAL_clean	0.692328	57.6	18.4206	9.23563	1.99452	In,Fe
55	XAHPIH_clean	0.692066	81.51	14.3167	13.3795	1.07005	Cu
56	BUNLAZ_clean	0.691012	57.34	38.3964	36.0932	1.06381	Zr
57	HABQUY_clean	0.689499	54.86	25.7153	12.0883	2.12729	Cu
58	XAFFAN_clean	0.675211	54.86	14.9132	13.243	1.12611	Zn
59	EDUVOO_clean	0.663151	54.8	20.9341	10.6286	1.9696	Zn
60	XAFFIV_clean	0.658291	55.61	14.2292	13.1937	1.07848	Co
61	OKUSUK_clean	0.652998	61.54	24.786	13.198	1.87802	Cu
62	XAFFUH_clean	0.629366	60.09	23.7283	19.638	1.20829	Cu
63	OCUNAC_manual	0.622989	49.35	36.1506	14.0466	2.57361	Cr
64	ja809985t_si_002_clean	0.610107	59.77	22.7784	8.92569	2.552	Zn
65	EMIZAD_clean	0.608331	62.49	35.5888	34.5106	1.03124	Zr
66	TOVJEV_clean	0.608277	59.1	13.6809	10.3707	1.31919	Fe
67	XAFFER_clean	0.607279	59.79	14.2192	13.2889	1.07001	Zn
68	VAGMEX_clean	0.606791	50.99	15.2806	14.4886	1.05466	Zn
69	KUVMIZ_clean	0.590862	57.11	15.7508	11.0076	1.43089	Cu,Si
70	REZXUQ_clean	0.580867	54.59	15.2629	13.9599	1.09334	Cr
71	NATKIF_clean	0.577467	56.17	17.0098	12.9386	1.31466	Cu
72	KAWHEY_clean	0.564199	66.53	18.2148	15.5853	1.16872	Zn
73	ALULEZ_clean	0.560043	60.21	18.755	13.3791	1.40181	Ce
74	BUNKUS_clean	0.559298	58.89	39.1106	37.4764	1.04361	Zr
75	VAGMAT_clean	0.558414	50.5	14.9209	13.2604	1.12522	Zn
76	ADATIK_clean	0.554313	68.09	24.5508	12.1743	2.01662	Cu
77	RAVWES_clean	0.553399	58.26	24.4406	23.6272	1.03443	Mg
78	SICZOV_clean	0.552431	63.07	18.7609	11.8664	1.58101	In
79	RAVWAO_clean	0.550358	68.9	17.9252	17.514	1.02348	Mg
80	FIFGEI_clean	0.54082	58.65	16.1529	14.6931	1.09935	In
81	ja4050828_auto	0.533675	66.38	29.2834	28.7488	1.0186	Zr
82	HABRAF_manual	0.52859	65.95	24.3095	9.03515	2.69055	Cu
83	ja408959g_si_002_clean	0.524656	65.97	31.0724	30.385	1.02263	Zr
84	BAZFUF_clean	0.524184	71.9	20.246	8.58384	2.35861	Cu
85	VETMIS_clean	0.520579	58.04	17.2398	11.9478	1.44293	Cu
86	XOVQEF_SL	0.511965	60.81	13.738	11.4264	1.20231	Zn
87	YODWUL_clean	0.506249	60.07	23.4936	11.5336	2.03697	Zn
88	REZXOK_clean	0.501873	67.18	14.2106	13.622	1.04321	Fe
89	ic101935f_si_002_auto	0.495797	51.73	13.5278	8.78691	1.53954	Zn
90	BEDYEQ_clean	0.482365	58.77	33.0586	31.4905	1.0498	Zr,Fe
91	ja512973b_si_003_auto	0.475987	57.53	21.3381	8.58252	2.48623	Zr
92	QIYDAF_clean	0.470074	69.1	22.9797	8.76388	2.62209	Cu
93	SUGDIJ_auto	0.465931	53.31	12.9956	11.5941	1.12088	Zn
94	DITJOH_clean	0.456849	58.05	19.431	8.59079	2.26184	Zr
95	HAVZIP_clean	0.456562	61.31	12.9546	9.6087	1.34821	Co
96	QEFWUV_clean	0.455231	62.07	32.3604	28.2677	1.14478	Zr,Fe
97	VANNIK_clean	0.453205	62.02	12.1173	10.7008	1.13238	U
98	WIJXIY_clean	0.453076	62.36	14.2439	11.557	1.2325	Zn
99	ZARLEL_clean	0.450645	61.88	14.4312	13.2845	1.08631	Zn
100	ja5103103_si_002_auto	0.442284	55.78	16.9503	14.4517	1.1729	Zr,Fe
101	VEBHUG_SL	0.4411	59.66	17.3025	9.82354	1.76133	Zn
102	QIYDIN01_clean	0.440513	59.68	21.6014	10.4566	2.06583	Cu
103	XUTQEI_clean	0.433405	64.03	15.0711	13.1397	1.14699	Ni
104	OXOLAP_SL	0.427554	71.07	19.1008	13.8578	1.37834	Zr
105	ja5111317_ja5111317_si_002_auto	0.424513	52.5	21.3794	8.74134	2.44578	Ni,Zr
106	XAFFOB_clean	0.419372	73.66	14.8391	13.174	1.12639	Cu
107	UBULIO_SL	0.410526	58.91	24.2323	22.8992	1.05821	Zn
108	OWIZAW_clean	0.410201	58.63	14.2364	11.7567	1.21093	Cu
109	HUYKIV_clean	0.408803	70.33	13.8999	13.6804	1.01604	Ni
110	BUXZAX_clean	0.404188	61.36	33.3768	31.8162	1.04905	Fe,Hf
111	YUSWEP_manual	0.396451	64.64	37.3405	13.0059	2.87104	Cu
112	NIBHUC_clean	0.395944	79.15	18.8677	11.8721	1.58925	Cu
113	ic800131r-file003_clean	0.394119	67.23	12.9498	9.58722	1.35074	Co
114	CAVPUM_manual	0.388828	62.42	20.4281	7.78019	2.62566	Zn
115	JOYKUF_clean	0.383745	71.24	15.8468	15.7515	1.00605	Mn
116	BINSAU_clean	0.383186	65.06	21.8801	9.52705	2.29663	Mn
117	JOGSAA_clean	0.376843	58.9	12.9763	9.4474	1.37353	Ni
118	BIPSUQ_clean	0.374288	72.08	18.6145	16.9288	1.09957	Cu
119	TOVJIZ_clean	0.372058	51.1	12.651	8.2906	1.52595	Fe
120	OLOGEC_clean	0.370697	55.97	13.0404	10.5352	1.2378	Zn
121	ja5b00365_si_002_clean	0.369602	65.65	21.7763	7.63115	2.8536	Zn
122	GISNED_clean	0.365745	52.19	16.8839	10.6099	1.59134	Zn
123	LARXUA_clean	0.364284	71.64	21.8367	11.1395	1.96029	Cu
124	QIYDEJ_clean	0.362586	55.4	22.4897	11.5568	1.94602	Cu
125	RAYMOV_clean	0.357615	62.68	13.9046	9.65699	1.43984	Mn
126	TOVJOF_clean	0.356361	54.45	12.425	8.36781	1.48486	Fe
127	RAVVUH_clean	0.355928	69.66	17.1826	16.3771	1.04919	Mg
128	FAHPOV_clean	0.354671	53.82	15.8333	12.7086	1.24587	Zn
129	VACLIX_clean	0.35419	57.04	25.8442	11.118	2.32454	Zr,Ir
130	BOLZIN_clean	0.354	60.22	18.7125	7.75585	2.41269	Zr
131	BAZFUF01_clean	0.349456	80.91	20.1456	8.54605	2.35731	Cu
132	KARNAU_clean	0.34914	58.87	15.5323	10.4817	1.48185	Ni
133	MALROJ_clean	0.34465	69.81	16.8437	16.7642	1.00474	Co
134	DOMDAL_clean	0.337209	64.3	18.4338	14.4549	1.27527	Tb
135	ja507947d_si_001_auto	0.33446	51.02	17.5271	9.15991	1.91346	Zr
136	YUZPIU_clean	0.332675	59.47	24.2826	10.2733	2.36367	Zn
137	MALRUP_clean	0.331506	65.89	16.9241	16.8441	1.00475	Fe
138	AVILEY_clean	0.329791	63.8	25.427	10.7684	2.36125	Ir,Hf
139	IZERAI_clean	0.329642	70.64	21.8199	21.117	1.03329	Ni
140	XAHPED_clean	0.328596	62.43	12.3692	10.8675	1.13818	Cu
141	POHWIU_clean	0.324393	62.36	15.9497	10.3936	1.53456	Co
142	VEGBUG_clean	0.32411	56.96	26.2956	9.06734	2.90003	Zr
143	DADLOM_clean	0.322171	63.89	18.7113	17.3665	1.07744	Mn
144	XIGFOJ_manual	0.321777	61.84	18.9086	18.7295	1.00956	Cd
145	ja5b02999_si_004_clean	0.321054	66.71	14.6919	13.07	1.12409	Cd
146	ZUCKIT_clean	0.320647	57.54	21.5414	12.8264	1.67946	Y
147	IZEPEJ_clean	0.319849	48.08	23.8744	6.75259	3.53559	Cr
148	LETRAF_clean	0.318212	49.75	26.759	26.4932	1.01003	Zn,Ga
149	MUBZUG_auto	0.315792	55.45	18.6354	7.90997	2.35594	Zr
150	DITJIB_clean	0.315706	52.25	20.3631	9.01147	2.25969	Hf
151	XALTIP_clean	0.315017	59.49	18.683	9.17237	2.03688	Zn,Co
152	FAYQED_clean	0.314596	60.18	12.559	10.1499	1.23735	Zn
153	cm901983a_si_001_clean	0.31317	68.19	27.7973	11.161	2.49056	Si
154	PODKUQ_clean	0.312902	67.81	22.3186	8.92625	2.50033	Cu
155	KOZQEX_clean	0.309578	62	22.4236	6.86083	3.26835	Cu
156	POTREX_clean	0.307185	61.63	14.7001	10.7986	1.36129	Co
157	UDEMEW_manual	0.306462	57.88	28.2375	11.695	2.41449	Cr
158	XOXMED_clean	0.305985	50.55	15.2027	12.4876	1.21742	Zn
159	WITKIV_clean	0.304933	60.16	20.4608	11.4837	1.78173	Zn
160	ja500330a_si_007_auto	0.299252	54.77	19.4624	14.4876	1.34338	Zr
161	DOZCEC_clean	0.295038	56.07	19.114	11.7403	1.62807	Mn
162	MUBZOA_auto	0.294372	49.25	18.7272	7.12	2.63022	Zr
163	jacs.6b09113_ja6b09113_si_002_clean	0.294287	58.49	13.3458	11.7012	1.14055	Zr
164	OYERER_clean	0.293083	53.68	14.3252	11.4527	1.25081	Cu,Cr
165	LEHXUT_clean	0.292932	55.99	24.9488	9.11981	2.73567	Cu
166	ja300034j_si_002_clean	0.291006	69.23	16.7889	16.7175	1.00427	Zn
167	ja406030p_si_003_clean	0.285615	57.73	14.2921	10.1282	1.41111	Zn,Cr
168	CAVPEW_manual	0.284725	51.22	20.2591	7.7782	2.6046	Co
169	LETQEI_clean	0.281368	53.34	25.6894	25.4389	1.00984	Zn,Ga
170	PUZMAZ_manual	0.280465	53.04	16.4214	9.23775	1.77764	Co
171	YOZQEK_clean	0.280315	60.73	13.98	12.0095	1.16407	Zn
172	acs.inorgchem.6b01740_ic6b01740_si_002_clean	0.271388	68.87	15.6805	8.0633	1.94468	Co
173	ZIJSAO_clean	0.271276	67.53	20.3296	7.50871	2.70747	Tb
174	ICAROV_clean	0.271177	58.51	20.3334	7.92146	2.56687	Ni
175	ICAQIO_clean	0.270952	52.58	20.3911	7.95732	2.56256	Co
176	BINROH_clean	0.269866	69.05	21.3137	10.2369	2.08205	Cu
177	CIGXIA_manual	0.269753	53.24	28.4868	11.8329	2.40742	Fe
178	BINRUN_clean	0.268667	58.57	21.1029	10.0936	2.09071	Zn
179	IYOWID_manual	0.268583	50.54	20.5167	7.7477	2.6481	Zn
180	FEFDEB_manual	0.268419	69.45	13.1091	11.5975	1.13033	Zn
181	ja5b02999_si_002_clean	0.267406	57.8	17.6862	16.7388	1.0566	Cd
182	ICAQOU_clean	0.266387	52.43	20.2997	7.90669	2.5674	Cu
183	CAVPIA_manual	0.264543	54.01	19.9203	7.75151	2.56987	Cu
184	ADASEF_clean	0.257341	65.2	21.6241	10.9231	1.97967	Cu
185	FALBAX_manual	0.254268	57.57	16.1525	9.49143	1.7018	Co
186	PELRIJ_clean	0.252827	68.45	21.5575	10.3834	2.07614	Cu
187	MEHMET_clean	0.25116	57.8	21.8234	9.06966	2.4062	Cu
188	YUZPEQ_clean	0.250798	55.94	21.4982	9.22584	2.33021	Zn
189	VEGCAN_clean	0.248709	56.73	26.2316	8.97115	2.924	Hf
190	GULVUF_clean	0.24675	62.11	16.1004	15.3251	1.05058	Yb
191	ATIJUJ_manual	0.245641	54.65	17.4403	16.9544	1.02866	Co
192	JENKET_SL	0.24402	69.55	12.8466	11.095	1.15788	Zn
193	OJIDAN_clean	0.241255	65.33	19.7987	19.3368	1.02389	Sc
194	RUYVIS_clean	0.239114	61.72	15.8929	13.202	1.20382	Eu
195	MIXZOK_clean	0.238304	62.84	13.1878	9.81049	1.34426	Ni
196	LAPZIO_clean	0.234911	69.06	15.3044	8.24294	1.85666	Cu
197	WOLYON_clean	0.231523	66.56	13.0808	12.3802	1.05659	Mn
198	SUNLET_clean	0.231283	69.94	14.8752	10.1053	1.47201	Cu
199	GUPBEZ02_clean	0.230426	59.59	23.8709	10.8478	2.20053	Cu
200	NEYVEU_clean	0.228864	48.04	20.1817	6.42425	3.14149	Zn
201	FUNCEX_clean	0.226684	58.77	13.2156	12.4769	1.0592	Zn
202	TOVJAR_clean	0.225892	58.22	12.4053	8.52361	1.4554	Fe,Co
203	XAVKIR_clean	0.225228	65.71	15.6283	12.5137	1.2489	Cu
204	PUZLUS_clean	0.224322	66.19	15.0914	8.39804	1.79702	Co
205	NUTYEI_clean	0.224175	68.79	13.0852	12.3573	1.0589	Eu
206	XIDSUZ_clean	0.223648	58.12	16.0531	15.7898	1.01668	Cu
207	BICPUA_clean	0.221174	66.16	13.7968	9.90606	1.39276	Yb
208	VEMMIK_clean	0.218985	65.58	14.0147	13.1676	1.06433	Mn
209	ABEXEN_clean	0.218454	71.12	18.8079	13.7187	1.37097	In
210	OTALUS_clean	0.215309	59.54	12.677	9.31362	1.36113	Zn
211	ja5b02999_si_003_clean	0.215065	60.32	14.7024	11.7935	1.24666	Cd
212	MUDTAH_clean	0.212833	58.7	18.8937	6.63386	2.84807	Zn
213	GAQYIH_clean	0.212494	41.39	20.2584	8.96976	2.25853	Cd
214	MILROQ_clean	0.21067	81.77	19.7171	10.8356	1.81966	Cu
215	KOJZIT_clean	0.210651	59.81	16.1957	14.7503	1.09799	Cu
216	NUTYIM_clean	0.210247	69.7	13.0843	12.3569	1.05887	Tb
217	YUZPOA_clean	0.208478	62.83	20.0872	6.66271	3.01488	Zn
218	ja512973b_si_002_auto	0.207183	40.11	17.7505	8.47189	2.09522	Zr
219	OHUMEL_clean	0.206292	52.51	14.0984	12.8651	1.09586	Mo,Zn
220	EJETAQ_clean	0.20605	69.34	12.5335	9.36877	1.33779	Na,Eu
221	XODPUD_clean	0.203869	57.81	15.8538	13.0893	1.2112	Zn,Cr
222	IVILEG_clean	0.198407	61.68	14.1452	13.2662	1.06626	Zn
223	WAVROC_clean	0.198256	52.11	18.8852	7.91531	2.38591	Mg,In
224	DOKDEN_clean	0.192391	68.36	15.1422	13.4436	1.12634	Cu
225	LELDUD_clean	0.191692	63.86	16.5482	9.24625	1.78972	Cu
226	ILITUT_manual	0.187585	57.46	12.6337	9.84913	1.28272	Co
227	IZEPAF_clean	0.18689	50.14	24.1004	7.53546	3.19827	Cr
228	MAHCOQ_clean	0.1851	55.35	18.8394	7.96401	2.36556	Zn,Co
229	ANUGEW_clean	0.18327	69.16	14.4419	10.2051	1.41516	Cu
230	PODKOK_clean	0.182473	65.27	18.5189	8.56409	2.16238	Cu
231	BOXFOK_clean	0.182007	66.18	18.0621	10.4233	1.73286	Dy
232	LETQAE_clean	0.178264	52.07	18.3193	17.5552	1.04352	Zn,Ga
233	YUXQIS_clean	0.177325	56.55	17.6536	14.4198	1.22426	Cd
234	OGEBAF01_clean	0.173004	63.96	14.7455	10.548	1.39794	Cu
235	LAWGUM_clean	0.171925	58.17	15.0997	7.93483	1.90297	Zn
236	ja5b02999_si_006_clean	0.171226	73.45	15.8149	13.6198	1.16117	Cd,Na
237	ALEJIM_clean	0.169618	71.92	18.2092	7.10984	2.56112	Zn
238	WIRKOZ_clean	0.165464	59.72	17.3855	6.83963	2.54187	Zn
239	FIDRIV_clean	0.164011	68.69	15.9933	15.9026	1.0057	Dy,Na
240	BETGUE_clean	0.158382	63.28	15.5313	9.65919	1.60794	Co
241	QAQMON_clean	0.157913	70.02	13.98	12.8757	1.08577	Cu
242	WUKXEH_clean	0.155735	70.17	20.0874	6.60038	3.04337	Cu
243	FORTUD_clean	0.155096	60.05	17.4656	10.3818	1.68233	Zn
244	GITVEL_clean	0.1544	58.05	15.2459	13.3795	1.1395	Zn
245	IZOWAW_clean	0.151097	51.51	18.9473	10.5132	1.80223	Mo,Zn
246	ZOFZUR_clean	0.151037	59.63	12.7273	10.7592	1.18291	Mn
247	LAWFOF_clean	0.149191	59.41	15.1012	7.95608	1.89807	Zn
248	ja408959g_si_003_clean	0.148216	64.88	17.3375	14.3282	1.21003	Zr
249	BAWROI_clean	0.146054	69.15	13.5498	9.13066	1.48399	Zn
250	ic5029383_si_002_clean	0.145427	62.57	13.8961	6.70448	2.07266	Zn
251	ic502643m_si_007_clean	0.144113	63.38	13.1918	11.6296	1.13433	Zn
252	SALXEL_clean	0.141151	64.23	17.7233	14.9258	1.18743	Zr
253	ic502643m_si_009_clean	0.139933	62.19	12.6574	11.15	1.13519	Zn
254	MAHCEG_clean	0.139324	58.72	18.5184	7.97271	2.32273	Cu,Zn
255	YURJUR_clean	0.139067	69.97	13.6925	8.47609	1.61543	Ce
256	MOXPUL_clean	0.138563	58.61	12.2945	11.9581	1.02813	Cu
257	ja406030p_si_004_clean	0.138079	61.41	12.4757	8.72571	1.42976	Zn,Cr
258	OLICIX_clean	0.13677	69.7	16.1602	9.89287	1.63352	Fe
259	ja808995d_si_002_clean	0.135318	60.03	17.6314	10.0389	1.75631	Cd
260	AQOMEA_clean	0.135205	71.53	15.8352	9.82464	1.61179	Co
261	AQOMEA01_clean	0.135205	66.54	15.7195	9.72839	1.61584	Co
262	LETPUX_clean	0.13472	55.22	17.6553	16.4347	1.07427	Zn,Ga
263	MAHCIK_clean	0.133515	50.1	18.7773	7.81499	2.40273	Zn
264	acs.jpcc.6b08594_Zn2Cd6MOF5_opt_clean	0.131593	55.34	14.7021	8.11021	1.81279	Cd,Zn
265	LETPUX01_clean	0.130386	52.48	17.6553	16.4347	1.07427	Zn,Ga
266	c6dt03852b_c6dt03852b2_clean	0.13002	56.03	13.1481	11.5799	1.13542	Zr
267	ic502643m_si_010_clean	0.126391	63.28	12.4694	12.0996	1.03056	Zn
268	ja110042b_si_003_clean	0.125692	58.47	18.775	6.41603	2.92626	Co
269	GAGQAI_clean	0.12454	61.88	15.6839	9.81587	1.59781	Fe
270	IKOVAH_clean	0.123735	59.72	16.0663	15.6884	1.02409	Eu,K
271	IKOTUZ_clean	0.123443	57.67	16.0507	15.6466	1.02583	Sm,K
272	KOJZEP_manual	0.122726	59.61	15.6144	13.7184	1.13821	Cu
273	TADWIG_manual	0.122429	61.91	12.202	12.0128	1.01575	Zn
274	GITVEL01_clean	0.120177	53.42	15.2767	13.3793	1.14181	Zn
275	ICODIP01_clean	0.120089	69.26	12.6239	9.97272	1.26584	Zn
276	ADASOP_clean	0.119418	54.04	18.0726	6.71346	2.692	Zn
277	AQOLEZ_clean	0.119146	71.92	15.5687	9.80847	1.58728	Co
278	FORKUU_clean	0.118938	58.17	13.2648	11.3344	1.17031	Zn,Si
279	WUTBEU_clean	0.118839	70.28	12.6568	12.4515	1.01649	Zr
280	OYERIV_clean	0.118206	61.44	14.6803	11.9522	1.22825	Cr,Mn
281	GULWEQ_clean	0.116279	53.34	15.981	7.52003	2.12513	Cd
282	TADWEC_manual	0.115195	60.83	12.9835	12.2235	1.06218	Zn
283	UMODEH16_clean	0.11496	79.26	13.0256	5.98917	2.17485	Cu
284	IKOVEL_clean	0.113988	57.18	15.9244	15.4838	1.02845	Pr,K
285	ALEJEI_clean	0.113834	76.47	18.0651	7.13825	2.53074	Cu
286	KUNSUJ_clean	0.113703	61.17	17.8879	6.52688	2.74065	In,Eu
287	CAJQIP_clean	0.113408	75.87	13.2774	7.61293	1.74406	Cu
288	MATXAJ_clean	0.113266	75.59	12.5	9.04853	1.38144	Zn
289	SIZPUN_clean	0.11305	72.08	19.2254	6.71018	2.86511	Zn
290	KADLUZ_clean	0.110667	72.74	14.2798	9.75466	1.46389	Cu
291	FATKIV_clean	0.110318	55.58	14.8417	10.4851	1.41551	Mn
292	HULCOI_clean	0.109943	54.11	19.4866	7.36184	2.64697	Cu
293	cg901312t_si_002_clean	0.108592	58.06	15.5483	7.92817	1.96115	Zn
294	FAYPAY_clean	0.108515	63.53	12.9079	5.24047	2.46313	Zn
295	cg501730q_si_002_clean	0.107593	65.79	15.2608	10.8434	1.40739	Cu
296	AGABIU_clean	0.107367	67.96	12.571	10.8274	1.16103	Ni,Li
297	REWNEO01_clean	0.10727	74.68	18.5111	6.94262	2.66629	Cu
298	PEWLUA_clean	0.10727	71.82	17.7712	7.51947	2.36336	Cu
299	REWNEO_clean	0.10727	65.54	19.3732	6.76945	2.86186	Cu
300	LOXKAM_clean	0.105527	66.29	14.5599	13.7822	1.05642	Cd
301	EXOTOB_clean	0.104631	66.3	13.2874	7.77882	1.70815	Ni
302	GUPDEB_clean	0.104312	60.98	20.6868	7.65386	2.7028	Cd
303	BETHIT_clean	0.102013	57.36	16.1767	10.5086	1.53937	Cd
304	HUFKUQ_clean	0.101936	50.13	12.9492	9.87431	1.3114	Cd
305	GOMFOF_clean	0.101443	59.51	14.8276	14.7703	1.00388	Pd,K
306	QAGQEW_clean	0.100545	81.11	16.4829	9.14033	1.80332	Cd
307	JUTCIM_clean	0.100501	54.95	15.7407	14.8786	1.05794	Cu
308	FAGQAI_clean	0.0979927	90.8	13.612	8.61498	1.58004	Cu
309	GOBGAG_clean	0.0966893	57.05	17.2644	5.3381	3.23418	Cd
310	GIXGOK_clean	0.0966893	53.88	17.3694	5.40179	3.21548	Cd
311	UDANEV_clean	0.0962279	70.75	13.7994	11.18	1.23429	In
312	CIRTUU_clean	0.0951615	60.03	15.602	7.15132	2.1817	Cu
313	UTEWOG_clean	0.0947825	66.56	14.5915	9.55269	1.52747	Ni
314	ADUWON_clean	0.0916897	64.38	16.3793	5.99724	2.73115	Ni
315	GOVWOF_clean	0.0915864	58.64	15.4253	11.2027	1.37693	Mn
316	MACHIJ_clean	0.0906825	76.14	13.2962	4.97277	2.67379	Zn
317	ja512762r_si_002_auto	0.0906512	46.99	13.2428	11.0914	1.19397	Zr
318	MUDTEL_clean	0.0905237	73.87	19.0951	6.59272	2.8964	Cu
319	VUKHOZ_clean	0.0902585	61.15	14.7203	13.8111	1.06584	Ag
320	cg500175k_si_001_auto	0.0902177	77.44	20.3771	9.90922	2.05638	Cu
321	IXEJOM_clean	0.0900202	56.69	15.0282	14.1511	1.06199	Zr
322	LOQLEJ_manual	0.0895506	70.28	14.6986	14.4045	1.02041	In
323	VUJBEI_clean	0.0893038	50.72	18.4478	6.57566	2.80546	Zn
324	RAHNOF_clean	0.0872706	64.66	19.0385	6.57368	2.89617	Cu
325	TEMPEI_clean	0.0866306	75.89	15.7146	10.8658	1.44624	Cu
326	RANWAH_clean	0.0848304	77.18	16.7453	9.32901	1.79497	Mn
327	XICNOO01_clean	0.0847601	64.08	19.5043	6.85327	2.84599	Zr
328	ADASUV_clean	0.0844956	60.34	17.1678	6.7332	2.54972	Co
329	XICNOO02_clean	0.0839125	67.35	19.5902	6.72401	2.91346	Zr
330	MEJMOE_clean	0.0838314	71.23	13.3608	7.20564	1.85422	Zn
331	MUWQEB_clean	0.0827445	60.61	15.6648	9.57746	1.63559	Fe
332	YUZCON_clean	0.0827209	58.18	12.8548	8.91717	1.44158	Mo,Zn
333	NEXVET_clean	0.0824253	57.08	15.0513	7.94511	1.89441	Ni
334	QOYYOU_clean	0.0821962	54.43	20.9843	4.51928	4.64329	Zn
335	EKUPEG_clean	0.0817934	63.48	12.1508	8.26476	1.47019	Cu
336	HUQHUY_clean	0.0813548	66.02	12.117	9.08074	1.33436	Zn
337	FOSTUE_clean	0.0811021	55.98	13.0957	7.43748	1.76077	In
338	NALYEG_clean	0.0809421	96.73	13.1227	12.8815	1.01872	U
339	XICYUF_clean	0.0792782	61.44	28.6789	6.71408	4.27145	Zr
340	c5cc04223b_c5cc04223b2_clean	0.078328	60.96	12.297	9.67035	1.27162	Zn
341	ERAMER_clean	0.0782768	53.52	12.8398	11.915	1.07761	Zr
342	IYUQID_clean	0.0772345	85.22	15.0918	9.842	1.5334	Na
343	ACUFEK_clean	0.0727624	44.06	15.5563	9.00897	1.72675	Cu
344	OMIPEH_clean	0.0691727	78.76	21.7314	7.72557	2.81291	Cu
345	OMITUB_clean	0.0691727	71.55	21.9666	7.7864	2.82114	Cu
346	LEVLEF_clean	0.0680603	66.68	20.181	6.8654	2.93952	Mg
347	OMIMEE_clean	0.0657391	74.67	16.5457	6.7257	2.46007	Cu
348	ICODIP_clean	0.063124	72.17	12.5506	9.93166	1.2637	Zn
349	LIKDOA_clean	0.0625509	114.56	18.4832	9.41931	1.96227	Cu
350	WAHKUO_clean	0.0621422	68.72	16.2089	7.16155	2.26332	Cu,Ti
351	GAGSUF_clean	0.0546888	91.13	13.2756	13.091	1.0141	Th
352	ADASIJ_clean	0.0543621	77.51	18.2344	6.60024	2.76268	Cu
353	jacs.6b04608_ja6b04608_si_003_clean	0.0490225	57.55	17.7455	10.1837	1.74255	Zr
354	ECAHAT_clean	0.0489399	72.3	12.3304	11.4865	1.07347	Zn
355	OKABAE_clean	0.0479129	97.06	14.0742	9.53484	1.47608	Cu
356	HUMWIX_clean	0.0434273	62.02	14.9857	9.18322	1.63185	Cu,Mn
357	KIYXUN_clean	0.0433213	92.75	17.2901	12.6482	1.367	Cu,Mn
358	BINDAF_manual	0.0421094	57.78	13.1432	8.49712	1.54678	Ni
359	YORLEY_clean	0.0384314	51.83	14.114	9.82464	1.4366	Ag,Au
360	XICZAM_clean	0.0372488	60.36	19.5214	6.64584	2.93738	Hf
361	ZICCIZ_clean	0.0369192	55.85	17.0822	7.88152	2.16738	Cd,Co
362	VEJHID_clean	0.0344188	53	17.6534	7.8833	2.23934	Cd
363	WAHNEB_clean	0.0333885	70.77	15.9584	6.79866	2.34728	Cu
364	WAHNOL_clean	0.0326705	71.91	16.1552	7.17077	2.25293	Cu
365	GUPCAW_clean	0.029862	56.68	13.6467	8.62891	1.58151	Cd
366	AQOLID_clean	0.0286291	95.29	15.4614	7.44821	2.07586	Co
367	TOZFOF_clean	0.0279206	40.37	13.7728	9.32974	1.47623	Ru,Co
368	AGOFEJ_clean	0.0264422	66.06	12.6138	8.71559	1.44727	Cu
369	NAYZOE_clean	0.0259035	81.94	15.8231	6.52553	2.42481	Cu
370	WAHNIF_clean	0.0258129	68.43	16.0273	6.94786	2.30679	Cu,Zr
371	CORZIU_clean	0.0255334	93.02	12.1554	11.6975	1.03914	In
372	PALTON_clean	0.0254422	56.08	12.8528	10.8845	1.18083	Cu
373	c5cc10203k_c5cc10203k2_clean	0.0251311	62.66	16.1105	7.03802	2.28907	Cu
374	OPIFUQ_clean	0.0235139	82.82	17.9991	10.1349	1.77594	Sr
375	jacs.6b06759_ja6b06759_si_004_clean	0.0216646	56.83	15.4905	7.85668	1.97163	Zr
376	jacs.6b06759_ja6b06759_si_002_clean	0.0179506	53.14	14.8109	8.19624	1.80704	Zr
377	ASINEX_clean	0.0173115	62.57	12.5357	7.27061	1.72416	Zn
378	SEWCED_clean	0.0173056	73.08	12.1737	9.5104	1.28004	Cd
379	ja406030p_si_006_manual	0.0170654	63.53	12.3608	7.19983	1.71681	Zn,Cr
380	XAKZIT_clean	0.0154143	61.77	12.2322	8.02038	1.52514	Mn
381	RAYMIP_clean	0.0135696	64.68	13.4742	9.8037	1.3744	In
382	jacs.6b06759_ja6b06759_si_003_clean	0.00852864	58.1	15.3841	7.99425	1.92439	Hf
383	BAPDAA_clean	0.00638298	79.85	12.3604	11.5468	1.07046	Cd
384	XICNOO_clean	0.00593321	49.54	19.6161	6.71064	2.92314	Zr
385	YEYCUC_SL	0.00262784	41.9	17.8235	5.70059	3.1266	Zr

## Sheet: IVER-non-adsorbing MOFs
The MOFs structural properties were take from:
Y. G. Chung et al., “Computation-ready, experimental metal-organic frameworks: A tool to enable high-throughput screening of nanoporous crystals,” Chemistry of Materials, vol. 26, no. 21, pp. 6185–6192, Nov. 2014, doi: 10.1021/CM502594J/SUPPL_FILE/CM502594J_SI_002.XLSX.
Y. G. Chung et al., “Advances, Updates, and Analytics for the Computation-Ready, Experimental Metal-Organic Framework Database: CoRE MOF 2019,” J Chem Eng Data, vol. 64, no. 12, pp. 5985–5998, Dec. 2019, doi: 10.1021/ACS.JCED.9B00835/SUPPL_FILE/JE9B00835_SI_004.ZIP.
	MOF_filename	IVER uptake (g/g)	LCD	PLD	LCD/PLD	All_Metals
	APARAM_clean	0	12.0009	11.0631	1.08477	Cu
	OZUKUR01_clean	0	12.0031	11.2085	1.07089	Cu
	MINCUJ_clean	0	12.0128	7.57315	1.58624	Cu
	AVIVUW_clean	0	12.0408	6.91892	1.74027	Cu
	WOYHUP_clean	0	12.0458	5.92239	2.03395	Cu
	LUYHAP_clean	0	12.0562	6.74493	1.78745	Cu
	UMODEH18_clean	0	12.0734	5.35338	2.25528	Cu,Mn
	XEBHOC_clean	0	12.082	9.91355	1.21874	Cu
	UMOVID_clean	0	12.0832	6.02223	2.00644	Cu
	XALBAO_clean	0	12.0897	7.27048	1.66285	Cu
	XALCET_clean	0	12.0955	7.67742	1.57546	Cu
	XALBES_clean	0	12.0986	7.46549	1.6206	Cu
	HOLQIK_clean	0	12.1081	3.4458	3.51387	Cu
	HUYKOB_clean	0	12.1174	9.13356	1.32669	Cu
	DOPHOH_clean	0	12.1258	5.64086	2.14963	Mn,U
	acs.inorgchem.6b02696_ic6b02696_si_002_clean	0	12.1312	5.0609	2.39705	Cu
	DOPHUN_clean	0	12.1335	5.61514	2.16086	Cu
	PAMTII_clean	0	12.14	5.49468	2.20941	Cu
	XALCAP_clean	0	12.1402	7.5095	1.61665	Cu
	KIJRUS_clean	0	12.1419	7.10734	1.70836	Cu
	XALBIW_clean	0	12.1422	7.80534	1.55562	Cu
	XAKZUF_clean	0	12.1469	7.7394	1.56948	U
	QAVBUL_clean	0	12.1478	9.97355	1.218	Cu
	XALBOC_clean	0	12.1616	7.7526	1.56871	Cu
	AYOQEM_clean	0	12.1645	6.87343	1.76979	Cu
	XALTOV_clean	0	12.1705	3.00948	4.04404	Cu
	EQUNIP_clean	0	12.1968	4.3543	2.8011	Cu
	ja500330a_si_006_auto	0	12.2058	6.15217	1.98399	Cu,Zn
	RUYVEO_clean	0	12.213	10.1222	1.20656	Cu
	EBATUZ_clean	0	12.2181	7.03158	1.7376	Cu
	ja903726m_si_002_clean	0	12.2486	4.72993	2.5896	Cu
	NERVEN_clean	0	12.2514	5.76203	2.12623	Cu
	MEGFIN_clean	0	12.2602	8.11803	1.51024	Cu,Zn
	ADARAA_clean	0	12.292	5.40077	2.27598	Cu
	ASIVAB_clean	0	12.3213	7.27063	1.69467	Cu
	WOYJEB_clean	0	12.328	5.95231	2.07113	Cu
	WOYJIF_clean	0	12.3325	5.92345	2.08198	Cu,Si
	FIBKEI_clean	0	12.3346	6.95883	1.7725	Zn
	PAMTOO_clean	0	12.3515	5.62136	2.19725	Mn
	XUDNUH_clean	0	12.3613	6.84234	1.80659	Cu
	KISVEO_clean	0	12.3701	6.46344	1.91386	Cu
	BOYCEY_auto	0	12.3721	6.12785	2.019	Nd
	ZUZZEB_clean	0	12.3842	6.8566	1.80617	Cu
	BIPKIW_clean	0	12.3845	3.37218	3.67256	Cu
	XALBUI_clean	0	12.3873	7.83288	1.58145	Cu
	ASINIB_clean	0	12.4005	7.22634	1.71602	Cu
	PAMTUU_clean	0	12.4009	5.62514	2.20454	Cu,Co
	MIXBEC_clean	0	12.4058	6.44619	1.92452	Nd
	MOYYIJ_clean	0	12.4205	9.37645	1.32465	Cu
	UMOVOJ_clean	0	12.4493	6.04966	2.05785	Cu
	REWLEM_clean_h	0	12.4698	5.92009	2.10636	Cu
	UMOBEF_clean	0	12.498	6.04018	2.06914	Cu
	LAFROB_manual	0	12.5028	5.7361	2.17966	Cu
	PEZCII_clean	0	12.5056	10.1886	1.22741	Cu
	KUJNEJ_clean	0	12.5183	7.61249	1.64445	Co
	RIVDEH_clean	0	12.5192	5.05893	2.47468	Cu
	WOYJOL_clean	0	12.521	5.76234	2.1729	Cu
	NAHNES_clean	0	12.5291	11.4526	1.094	Cu
	KARLUM_clean	0	12.5342	7.4934	1.67269	Cu
	NERVAJ_clean	0	12.5344	5.46518	2.29351	Fe
	HUJGEA_clean	0	12.5394	4.7914	2.61707	Cu
	MAYKOO_clean	0	12.5822	11.5029	1.09383	Cu
	POBNEA_clean	0	12.6133	10.849	1.16263	Cu
	c4ce00408f_c4ce00408f2_clean	0	12.6276	5.23882	2.41039	Cu
	EPISOM_clean	0	12.6394	6.49016	1.94747	Li,Co
	FIFGIM_clean	0	12.6449	7.03976	1.79622	Cu,Ni
	cg400449c_si_001_clean	0	12.6579	7.41339	1.70744	Mn
	ic502254c_si_002_clean	0	12.6821	7.60887	1.66675	Cu
	GUPBUP_SL	0	12.6903	3.67391	3.45417	Cu
	jinoche.2015.03.054_CIFs_clean	0	12.6953	7.85866	1.61546	Cu
	FUQJUX_clean	0	12.6972	8.47633	1.49796	Cu
	c5dt03091a_c5dt03091a2_clean	0	12.7076	7.22422	1.75902	Co
	ADOGEH_clean	0	12.7145	5.05258	2.51643	In
	AWAHAI_clean	0	12.7414	3.10347	4.10554	Cu
	WIZMAV02_auto	0	12.745	5.77928	2.20529	Cu
	LIQDAS_clean	0	12.8039	5.86346	2.18368	V
	LEVDIB_clean	0	12.8102	4.05785	3.1569	Co
	QAGDIO_clean	0	12.8105	10.0847	1.27028	Cu
	ic5b01023_si_002_clean	0	12.8128	3.94057	3.2515	Ni
	GAMXAV_clean	0	12.8282	4.31562	2.9725	Cu
	DICKEH_clean	0	12.8399	7.4101	1.73275	Cu
	FUTTIZ_clean	0	12.856	4.31062	2.9824	Al
	CUVHIL01_clean	0	12.865	12.0222	1.0701	Cu
	CUVHIL_clean_h	0	12.8761	12.0325	1.07011	In
	ETAXUT_clean	0	12.8936	7.93773	1.62434	Cu
	EBAMUS_clean	0	12.9445	5.39251	2.40046	Cu
	ALICAA_clean	0	12.9879	3.46699	3.74615	Cu
	RIVDIL_clean	0	12.9952	5.18013	2.50866	Dy
	RIFDUG01_clean	0	13.0054	6.82625	1.90521	Cu
	KARNID_clean	0	13.0436	6.77607	1.92495	Tb
	LAFRER_manual	0	13.0544	5.12975	2.54485	Er
	ELERIY_clean	0	13.0687	6.51652	2.00548	Cu
	UVEVUN_clean	0	13.0863	6.53433	2.00271	Cu
	TOVKEW_clean	0	13.1524	8.94797	1.46988	Cu
	DUGMOJ_clean	0	13.1595	6.68014	1.96994	Ni
	KULMEK_clean	0	13.2104	7.45311	1.77247	Cu
	YOCLIN_clean	0	13.2235	6.67449	1.98121	Cu,Si
	FAYQAZ_clean	0	13.2509	5.37829	2.46378	Cd
	YOZNAE_clean	0	13.2791	6.70029	1.98186	Cu
	BINCUY_manual	0	13.3117	8.62623	1.54317	Yb
	GUHMIH_clean	0	13.3149	6.32995	2.10348	In,Mn
	EVAKIV_clean	0	13.3499	4.00312	3.33487	Cu
	MEFJOY_clean	0	13.3554	4.52002	2.95473	Cu
	la4012839_si_002_auto	0	13.3691	6.74856	1.98103	Mn
	acs.inorgchem.6b02413_ic6b02413_si_002_clean	0	13.3773	6.88163	1.94392	Co
	MUNDEG_clean	0	13.4484	12.6512	1.06302	Eu
	NASROR_clean	0	13.4523	4.98216	2.70009	Co
	FEWWUB_clean	0	13.4629	4.10343	3.2809	Co
	LAQNID_clean	0	13.5144	6.53331	2.06854	Ag
	YUVGOL_SL	0	13.518	2.67027	5.06242	Tb
	XASNUD_clean	0	13.5188	4.58024	2.95154	Zn
	LIKGUJ_clean	0	13.5559	7.04166	1.9251	Zn
	RUPVAB_clean	0	13.6174	4.61754	2.94906	Cd
	MEFJUE_clean	0	13.6466	4.52582	3.01528	Cu
	UKIQOV_clean	0	13.6671	9.63813	1.41803	Er
	LUXDUE_clean	0	13.6894	4.23916	3.22928	La
	YEKQOW_clean	0	13.7102	3.97085	3.4527	Zn
	LUXFUG_clean	0	13.7104	4.29007	3.19585	Co
	LUXFOA_clean	0	13.7395	4.3179	3.18198	Zn
	VEHKIE_SL	0	13.7712	4.50888	3.05425	Co
	ENIHUG01_clean	0	13.7857	6.83219	2.01775	Zn
	cg301577a_si_002_clean	0	13.7962	7.99146	1.72636	Zn
	ENIHUG_clean	0	13.8207	6.83124	2.02316	Mn,Si
	ANUGIA_clean	0	13.8531	6.75838	2.04976	Tb
	LASDEQ_clean	0	13.8531	8.72821	1.58716	Mg
	OKABEI_clean	0	13.8699	9.42284	1.47194	La
	RAYFEE_clean	0	13.8756	10.0361	1.38257	Zn
	JOCWIJ_clean	0	13.8977	5.51402	2.52042	Tb
	FAMQES_clean	0	13.9231	6.55268	2.1248	Zn
	CAJQEL_clean	0	13.9366	8.23046	1.6933	Mn
	NIGDEO_clean	0	13.9402	7.42068	1.87856	Co
	BETGIS_clean	0	14.0028	4.06192	3.44733	Co
	NIGDIS_clean	0	14.0316	7.36423	1.90538	In,Zn
	HOGLEV_clean	0	14.034	9.0463	1.55135	Co
	NUBBAP_clean	0	14.0542	6.66438	2.10885	Mn
	ic402692p_si_004_clean	0	14.0627	4.49755	3.12675	Cu
	VEHJOJ_clean	0	14.0992	6.85678	2.05625	Zr
	EBAVAH_auto	0	14.11	7.45371	1.89302	Zn
	MUNDOQ_clean	0	14.169	13.3498	1.06136	Co
	FAMQAO_clean	0	14.1997	6.54893	2.16825	Mn
	AXUBAW_manual	0	14.2457	5.52422	2.57877	W,Zn
	VEHJUP_clean	0	14.2807	6.83408	2.08963	Co
	FAMPUH_clean	0	14.2973	6.50644	2.1974	Co
	ZAZNUL_clean	0	14.3322	5.62688	2.54709	Zn
	YABHER_clean	0	14.3729	4.52414	3.17694	Mn
	KIYTOD_clean	0	14.3875	6.75209	2.13082	Zn
	PACZOK_clean	0	14.4226	6.94223	2.07752	Zn
	SETPEO_clean	0	14.4705	3.66339	3.95002	Fe
	KUCDES_clean	0	14.5665	4.11545	3.53946	Zn
	BIBXUH_clean	0	14.739	5.12647	2.87508	Cd
	PIJJEZ_clean	0	14.7539	5.96588	2.47306	Zn
	WAVRAO_clean	0	15.0227	4.23694	3.54566	Co
	EDUTIG_clean	0	15.0496	5.6073	2.68393	Zn
	VEJHEZ_clean	0	15.0577	6.22214	2.42002	Zr
	BETGOY_clean	0	15.1649	5.42937	2.79313	Ni
	BETGEO_clean	0	15.2158	5.06222	3.00575	Ni
	MIVFEE_clean	0	15.2363	7.95854	1.91446	Zn
	MIHHAN_SL	0	15.2577	2.90995	5.24327	Mn
	MIHHIV_clean	0	15.2984	2.91098	5.25541	Zn
	KUCDIW_clean	0	15.3296	4.28733	3.57555	Zn
	RULXOM_clean	0	15.3697	3.55595	4.32225	Ni
	SENVIR_clean	0	15.3734	3.88956	3.95249	Mn
	GADNUX_clean	0	15.4379	6.70397	2.3028	Mn
	ZIMTAS_clean	0	15.448	6.02893	2.56231	Zn
	YAVWUQ_clean	0	15.486	6.62234	2.33844	Zn
	BOWNUY_clean	0	15.5271	9.99848	1.55295	Mn
	MIVFOO_clean	0	15.5954	7.18908	2.16932	Mn
	SUVNEE_clean	0	15.6562	6.95834	2.24999	Mn
	AQOMAW_clean	0	15.6595	6.23259	2.51252	Zn,Ti
	COCMOY_clean	0	15.7132	6.14739	2.55607	Zn
	c6ce00407e_c6ce00407e1_clean	0	15.7759	8.21654	1.92001	Ni
	RAYFAA_clean	0	15.8178	9.45289	1.67333	Zn
	c6ta00429f_c6ta00429f2_clean	0	15.8689	5.53957	2.86465	Zn
	MIHHER_clean	0	15.9185	2.85919	5.5675	Fe
	WAMREJ_clean	0	15.9383	10.4935	1.51887	Zn
	BETHEP_clean	0	15.9397	5.38602	2.95946	Cd
	NAMDUD_clean	0	16.0348	3.9849	4.0239	Zn
	POBMOJ01_clean	0	16.0903	3.85233	4.17677	Zr
	EZOFOP_clean	0	16.0973	3.03368	5.3062	Zn
	XALXUF_clean	0	16.2966	6.6292	2.4583	Yb
	QOWQUO_manual	0	16.3651	5.22924	3.12953	Ni
	science.1056698_manual	0	16.3652	5.22927	3.12954	Ni
	ZINDAD_clean	0	16.3928	6.7436	2.43086	Mn
	QOWRAV02_clean	0	16.406	5.24588	3.1274	Zn
	SOVLEW_clean	0	16.7899	6.64048	2.52842	Zn
	XUFYAA_clean	0	16.8024	4.60613	3.64783	Zn
	DIBQEM_clean	0	16.8285	3.4822	4.83271	Ag
	NIGNUO_clean	0	16.8891	3.72632	4.53237	Ag
	cg900153m_si_001_clean	0	16.9426	7.25585	2.33503	Zn
	YOZBAS_clean	0	16.9443	7.02537	2.41187	Zn
	cg501231v_si_001_clean	0	17.0677	7.18297	2.37614	Ti
	HIYGIH_clean	0	17.0695	6.66429	2.56134	Li
	ic5b00535_si_002_clean	0	17.8828	5.61829	3.18296	Cd
	DOMCUE_clean	0	18.2501	13.5468	1.34719	Zr
	CUQSAK_clean	0	18.3005	4.50008	4.0667	Cu
	ja5b02999_si_007_clean	0	19.2415	15.8193	1.21633	Tb
	UZAROE_clean	0	19.5454	7.16489	2.72794	Cu
	XOFGAC_clean	0	20.2849	4.16314	4.8725	Mn
	NIBJAK_clean	0	32.0035	17.5517	1.82338	Cu

## Sheet: PLD>12.00
The MOFs structural properties were take from:
Y. G. Chung et al., “Computation-ready, experimental metal-organic frameworks: A tool to enable high-throughput screening of nanoporous crystals,” Chemistry of Materials, vol. 26, no. 21, pp. 6185–6192, Nov. 2014, doi: 10.1021/CM502594J/SUPPL_FILE/CM502594J_SI_002.XLSX.
Y. G. Chung et al., “Advances, Updates, and Analytics for the Computation-Ready, Experimental Metal-Organic Framework Database: CoRE MOF 2019,” J Chem Eng Data, vol. 64, no. 12, pp. 5985–5998, Dec. 2019, doi: 10.1021/ACS.JCED.9B00835/SUPPL_FILE/JE9B00835_SI_004.ZIP.
	MOF_filename	IVER uptake (g/g)	Isosteric heats (kcal/mol)	LCD	PLD	LCD/PLD	All_Metals
	YOZQEK_clean	0.280315	60.73	13.98	12.0095	1.16407	Zn
	TADWIG_manual	0.122429	61.91	12.202	12.0128	1.01575	Zn
	HABQUY_clean	0.689499	54.86	25.7153	12.0883	2.12729	Cu
	ic502643m_si_010_clean	0.126391	63.28	12.4694	12.0996	1.03056	Zn
	ADATIK_clean	0.554313	68.09	24.5508	12.1743	2.01662	Cu
	CUSYAR_clean	1.21668	52.78	28.0134	12.18	2.29996	Zn
	ja512973b_si_004_auto	0.884771	56.79	23.1345	12.211	1.89456	Zr
	TADWEC_manual	0.115195	60.83	12.9835	12.2235	1.06218	Zn
	NUTYIM_clean	0.210247	69.7	13.0843	12.3569	1.05887	Tb
	NUTYEI_clean	0.224175	68.79	13.0852	12.3573	1.0589	Eu
	WOLYON_clean	0.231523	66.56	13.0808	12.3802	1.05659	Mn
	WUTBEU_clean	0.118839	70.28	12.6568	12.4515	1.01649	Zr
	FUNCEX_clean	0.226684	58.77	13.2156	12.4769	1.0592	Zn
	XOXMED_clean	0.305985	50.55	15.2027	12.4876	1.21742	Zn
	AVAKEP_clean	1.19752	61.85	25.1756	12.4937	2.01507	Cu
	XAVKIR_clean	0.225228	65.71	15.6283	12.5137	1.2489	Cu
	AVAKAL_clean	1.53204	65.31	26.2529	12.5751	2.08769	Cu
	KIYXUN_clean	0.0433213	92.75	17.2901	12.6482	1.367	Cu,Mn
	FAHPOV_clean	0.354671	53.82	15.8333	12.7086	1.24587	Zn
	ZUCKIT_clean	0.320647	57.54	21.5414	12.8264	1.67946	Y
	OHUMEL_clean	0.206292	52.51	14.0984	12.8651	1.09586	Mo,Zn
	QAQMON_clean	0.157913	70.02	13.98	12.8757	1.08577	Cu
	NALYEG_clean	0.0809421	96.73	13.1227	12.8815	1.01872	U
	NATKIF_clean	0.577467	56.17	17.0098	12.9386	1.31466	Cu
	OKUTEV_clean	0.697896	59.7	23.0646	12.9827	1.77656	Cu
	YUSWEP_manual	0.396451	64.64	37.3405	13.0059	2.87104	Cu
	ja5b02999_si_004_clean	0.321054	66.71	14.6919	13.07	1.12409	Cd
	XODPUD_clean	0.203869	57.81	15.8538	13.0893	1.2112	Zn,Cr
	GAGSUF_clean	0.0546888	91.13	13.2756	13.091	1.0141	Th
	XUTQEI_clean	0.433405	64.03	15.0711	13.1397	1.14699	Ni
	TOVKOG_clean	0.793669	55.53	22.8421	13.1462	1.73755	Fe
	VEMMIK_clean	0.218985	65.58	14.0147	13.1676	1.06433	Mn
	XAFFOB_clean	0.419372	73.66	14.8391	13.174	1.12639	Cu
	XAFFIV_clean	0.658291	55.61	14.2292	13.1937	1.07848	Co
	OKUSUK_clean	0.652998	61.54	24.786	13.198	1.87802	Cu
	RUYVIS_clean	0.239114	61.72	15.8929	13.202	1.20382	Eu
	XAFFAN_clean	0.675211	54.86	14.9132	13.243	1.12611	Zn
	VAGMAT_clean	0.558414	50.5	14.9209	13.2604	1.12522	Zn
	IVILEG_clean	0.198407	61.68	14.1452	13.2662	1.06626	Zn
	AXINAX01_clean	0.792937	66.98	19.4749	13.2777	1.46673	Co
	ZARLEL_clean	0.450645	61.88	14.4312	13.2845	1.08631	Zn
	XAFFER_clean	0.607279	59.79	14.2192	13.2889	1.07001	Zn
	ADATEG_manual	1.18427	59.33	27.3378	13.339	2.04946	Cu
	ALULEZ_clean	0.560043	60.21	18.755	13.3791	1.40181	Ce
	GITVEL01_clean	0.120177	53.42	15.2767	13.3793	1.14181	Zn
	GITVEL_clean	0.1544	58.05	15.2459	13.3795	1.1395	Zn
	XAHPIH_clean	0.692066	81.51	14.3167	13.3795	1.07005	Cu
	DOKDEN_clean	0.192391	68.36	15.1422	13.4436	1.12634	Cu
	ja5b02999_si_006_clean	0.171226	73.45	15.8149	13.6198	1.16117	Cd,Na
	REZXOK_clean	0.501873	67.18	14.2106	13.622	1.04321	Fe
	HUYKIV_clean	0.408803	70.33	13.8999	13.6804	1.01604	Ni
	KOJZEP_manual	0.122726	59.61	15.6144	13.7184	1.13821	Cu
	ABEXEN_clean	0.218454	71.12	18.8079	13.7187	1.37097	In
	LOXKAM_clean	0.105527	66.29	14.5599	13.7822	1.05642	Cd
	VUKHOZ_clean	0.0902585	61.15	14.7203	13.8111	1.06584	Ag
	OXOLAP_SL	0.427554	71.07	19.1008	13.8578	1.37834	Zr
	REZXUQ_clean	0.580867	54.59	15.2629	13.9599	1.09334	Cr
	BAZGEQ_clean	0.706298	59.26	27.2403	13.9632	1.95087	Cu
	XONLES01_clean	0.882764	64.75	15.5522	13.9713	1.11316	Cu
	OCUNAC_manual	0.622989	49.35	36.1506	14.0466	2.57361	Cr
	IXEJOM_clean	0.0900202	56.69	15.0282	14.1511	1.06199	Zr
	PIBNUK01_clean	0.813614	66.64	15.3719	14.1834	1.0838	Zn
	PIBNUK_clean	0.803418	68.7	15.3841	14.1862	1.08444	Zn
	PIBPIA_clean	0.720857	60.27	15.4937	14.2536	1.087	Cd
	ja408959g_si_003_clean	0.148216	64.88	17.3375	14.3282	1.21003	Zr
	LOQLEJ_manual	0.0895506	70.28	14.6986	14.4045	1.02041	In
	YUXQIS_clean	0.177325	56.55	17.6536	14.4198	1.22426	Cd
	ja5103103_si_002_auto	0.442284	55.78	16.9503	14.4517	1.1729	Zr,Fe
	DOMDAL_clean	0.337209	64.3	18.4338	14.4549	1.27527	Tb
	ja500330a_si_007_auto	0.299252	54.77	19.4624	14.4876	1.34338	Zr
	VAGMEX_clean	0.606791	50.99	15.2806	14.4886	1.05466	Zn
	ALEJAE_clean	1.07206	55.07	19.8654	14.5686	1.36358	In
	YODWOF_clean	0.800042	59.77	21.6034	14.6374	1.4759	Zn
	RUTNOK_manual	1.52594	62.53	24.6126	14.6485	1.68022	Zn
	FIFGEI_clean	0.54082	58.65	16.1529	14.6931	1.09935	In
	KOJZIT_clean	0.210651	59.81	16.1957	14.7503	1.09799	Cu
	GOMFOF_clean	0.101443	59.51	14.8276	14.7703	1.00388	Pd,K
	JUTCIM_clean	0.100501	54.95	15.7407	14.8786	1.05794	Cu
	NIBHOW_clean	1.18879	74.71	27.5106	14.8846	1.84826	Cu
	HOHMEX_manual	0.942119	60.92	18.7842	14.8946	1.26114	Cu
	SALXEL_clean	0.141151	64.23	17.7233	14.9258	1.18743	Zr
	QIYDIN_clean	1.71577	69.62	29.975	15.0225	1.99534	Cu
	GULVUF_clean	0.24675	62.11	16.1004	15.3251	1.05058	Yb
	XAHPON_clean	0.91032	63.51	17.2951	15.3322	1.12803	Cu
	IKOVEL_clean	0.113988	57.18	15.9244	15.4838	1.02845	Pr,K
	KAWHEY_clean	0.564199	66.53	18.2148	15.5853	1.16872	Zn
	IKOTUZ_clean	0.123443	57.67	16.0507	15.6466	1.02583	Sm,K
	IKOVAH_clean	0.123735	59.72	16.0663	15.6884	1.02409	Eu,K
	FEBXIV_clean	0.886415	65.91	17.2864	15.7464	1.0978	Cu
	JOYKUF_clean	0.383745	71.24	15.8468	15.7515	1.00605	Mn
	XIDSUZ_clean	0.223648	58.12	16.0531	15.7898	1.01668	Cu
	FIDRIV_clean	0.164011	68.69	15.9933	15.9026	1.0057	Dy,Na
	HEXVEM_clean	1.20589	76.53	28.4313	15.9175	1.78616	Cu
	RAVVUH_clean	0.355928	69.66	17.1826	16.3771	1.04919	Mg
	LETPUX_clean	0.13472	55.22	17.6553	16.4347	1.07427	Zn,Ga
	LETPUX01_clean	0.130386	52.48	17.6553	16.4347	1.07427	Zn,Ga
	ja300034j_si_002_clean	0.291006	69.23	16.7889	16.7175	1.00427	Zn
	ja5b02999_si_002_clean	0.267406	57.8	17.6862	16.7388	1.0566	Cd
	MALROJ_clean	0.34465	69.81	16.8437	16.7642	1.00474	Co
	MALRUP_clean	0.331506	65.89	16.9241	16.8441	1.00475	Fe
	BIPSUQ_clean	0.374288	72.08	18.6145	16.9288	1.09957	Cu
	ATIJUJ_manual	0.245641	54.65	17.4403	16.9544	1.02866	Co
	QIYDOT_clean	1.56219	64.47	19.8186	17.0636	1.16145	Cu
	ADUROI_clean	0.723842	59.94	25.6855	17.1242	1.49995	Zn
	DADLOM_clean	0.322171	63.89	18.7113	17.3665	1.07744	Mn
	RAVWAO_clean	0.550358	68.9	17.9252	17.514	1.02348	Mg
	LETQAE_clean	0.178264	52.07	18.3193	17.5552	1.04352	Zn,Ga
	BIHBAX_clean	0.90614	46.4	18.5744	17.5567	1.05797	Ag,Cr
	ECOKAJ_clean	1.15044	63.11	18.9972	17.5755	1.08089	Zn
	UNUNEY_clean	1.49521	55.38	34.0067	17.6376	1.92808	U
	XIGFOJ_manual	0.321777	61.84	18.9086	18.7295	1.00956	Cd
	RUBDUP_clean	1.16551	62	21.0952	19.2468	1.09604	Zn
	OJIDAN_clean	0.241255	65.33	19.7987	19.3368	1.02389	Sc
	AVAJUE_clean	1.9619	54.03	37.5257	19.5411	1.92035	Cu
	ja403810k_si_002_clean	0.739509	56.1	24.1144	19.5628	1.23267	Zn
	XAFFUH_clean	0.629366	60.09	23.7283	19.638	1.20829	Cu
	jacs.6b01663_ja6b01663_si_003_clean	0.82653	56.47	27.6264	19.6462	1.40619	Zr
	XAHPUT_clean	2.03631	61.02	21.8281	20.5859	1.06034	Cu
	BIGZUO_clean	0.931818	54.26	21.7232	20.9879	1.03503	Ag,Cr
	IZERAI_clean	0.329642	70.64	21.8199	21.117	1.03329	Ni
	UHUPOD01_clean	2.10887	57.37	33.0778	21.4039	1.54541	Zn
	XAHQAA_clean	2.37974	66.9	23.0353	21.6072	1.0661	Cu
	UBULIO_SL	0.410526	58.91	24.2323	22.8992	1.05821	Zn
	ja507269n_si_002_clean	0.694051	60.69	27.3395	23.1844	1.17922	Fe
	RAVWES_clean	0.553399	58.26	24.4406	23.6272	1.03443	Mg
	BAZGAM_clean	3.2484	61.24	42.7982	24.2406	1.76556	Cu
	LETQEI_clean	0.281368	53.34	25.6894	25.4389	1.00984	Zn,Ga
	ja507269n_si_003_clean	0.92841	65.61	27.2094	25.5491	1.06498	Fe,Co
	LETRAF_clean	0.318212	49.75	26.759	26.4932	1.01003	Zn,Ga
	jacs.6b08724_ja6b08724_si_014_clean	1.1137	61.52	28.056	26.5894	1.05516	Mg
	jacs.6b08724_ja6b08724_si_009_clean	1.01815	69.03	28.3891	26.8915	1.05569	Co
	RAVWOC_clean	0.741912	58.05	28.2177	27.5597	1.02388	Mg
	QEFWUV_clean	0.455231	62.07	32.3604	28.2677	1.14478	Zr,Fe
	ja4050828_auto	0.533675	66.38	29.2834	28.7488	1.0186	Zr
	FOTNIN_clean	1.53504	59.94	33.6216	29.9295	1.12336	Zr
	RAVWIW_clean	0.919566	62.46	30.7005	30.1441	1.01846	Mg
	ja408959g_si_002_clean	0.524656	65.97	31.0724	30.385	1.02263	Zr
	BEDYEQ_clean	0.482365	58.77	33.0586	31.4905	1.0498	Zr,Fe
	BUXZAX_clean	0.404188	61.36	33.3768	31.8162	1.04905	Fe,Hf
	RAVXAP_clean	1.07412	57.63	34.8596	34.3554	1.01468	Mg
	EMIZAD_clean	0.608331	62.49	35.5888	34.5106	1.03124	Zr
	BUNLAZ_clean	0.691012	57.34	38.3964	36.0932	1.06381	Zr
	RAVWUI_clean	1.05111	64.64	36.7876	36.4331	1.00973	Zn
	BUNKUS_clean	0.559298	58.89	39.1106	37.4764	1.04361	Zr
	RAVXET_clean	0.890607	55.55	38.2281	38.0665	1.00425	Mg
	RAVXIX_clean	1.58257	57.53	53.5767	53.2643	1.00587	Mg
	RAVXOD_clean	2.0907	52.45	71.6412	71.502	1.00195	Mg

## Sheet: PLD<12.00
The MOFs structural properties were take from:
Y. G. Chung et al., “Computation-ready, experimental metal-organic frameworks: A tool to enable high-throughput screening of nanoporous crystals,” Chemistry of Materials, vol. 26, no. 21, pp. 6185–6192, Nov. 2014, doi: 10.1021/CM502594J/SUPPL_FILE/CM502594J_SI_002.XLSX.
Y. G. Chung et al., “Advances, Updates, and Analytics for the Computation-Ready, Experimental Metal-Organic Framework Database: CoRE MOF 2019,” J Chem Eng Data, vol. 64, no. 12, pp. 5985–5998, Dec. 2019, doi: 10.1021/ACS.JCED.9B00835/SUPPL_FILE/JE9B00835_SI_004.ZIP.
	MOF_filename	IVER uptake (g/g)	Isosteric heats (kcal/mol)	LCD	PLD	LCD/PLD	AV_cm3_g	AV_cm3_g
	OYERIV_clean	0.138563	58.61	58.61	11.9581	1.02813	0.931333	Cu
	VETMIS_clean	0.118206	61.44	61.44	11.9522	1.22825	0.878015	Cr,Mn
	ERAMER_clean	0.520579	58.04	58.04	11.9478	1.44293	2.77664	Cu
	NIBHUC_clean	0.0782768	53.52	53.52	11.915	1.07761	1.09365	Zr
	SICZOV_clean	0.395944	79.15	79.15	11.8721	1.58925	1.84387	Cu
	CIGXIA_manual	0.552431	63.07	63.07	11.8664	1.58101	2.00247	In
	ja5b02999_si_003_clean	0.269753	53.24	53.24	11.8329	2.40742	1.11451	Fe
	OWIZAW_clean	0.215065	60.32	60.32	11.7935	1.24666	1.01557	Cd
	DOZCEC_clean	0.410201	58.63	58.63	11.7567	1.21093	2.21785	Cu
	jacs.6b09113_ja6b09113_si_002_clean	0.295038	56.07	56.07	11.7403	1.62807	1.76891	Mn
	CORZIU_clean	0.294287	58.49	58.49	11.7012	1.14055	1.34698	Zr
	UDEMEW_manual	0.0255334	93.02	93.02	11.6975	1.03914	1.04277	In
	ic502643m_si_007_clean	0.306462	57.88	57.88	11.695	2.41449	1.11656	Cr
	FEFDEB_manual	0.144113	63.38	63.38	11.6296	1.13433	1.09157	Zn
	SUGDIJ_auto	0.268419	69.45	69.45	11.5975	1.13033	1.42783	Zn
	c6dt03852b_c6dt03852b2_clean	0.465931	53.31	53.31	11.5941	1.12088	2.04775	Zn
	WIJXIY_clean	0.13002	56.03	56.03	11.5799	1.13542	1.01385	Zr
	QIYDEJ_clean	0.453076	62.36	62.36	11.557	1.2325	1.73148	Zn
	BAPDAA_clean	0.362586	55.4	55.4	11.5568	1.94602	1.88676	Cu
	GAGZEV_clean	0.00638298	79.85	79.85	11.5468	1.07046	0.498906	Cd
	YODWUL_clean	0.775777	65.42	65.42	11.5377	2.48448	3.15817	Cu
	ECAHAT_clean	0.506249	60.07	60.07	11.5336	2.03697	1.99997	Zn
	WITKIV_clean	0.0489399	72.3	72.3	11.4865	1.07347	0.712418	Zn
	OYERER_clean	0.304933	60.16	60.16	11.4837	1.78173	1.32449	Zn
	XOVQEF_SL	0.293083	53.68	53.68	11.4527	1.25081	1.81543	Cu,Cr
	FORKUU_clean	0.511965	60.81	60.81	11.4264	1.20231	1.89649	Zn
	GOVWOF_clean	0.118938	58.17	58.17	11.3344	1.17031	1.25087	Zn,Si
	UDANEV_clean	0.0915864	58.64	58.64	11.2027	1.37693	0.876851	Mn
	cm901983a_si_001_clean	0.0962279	70.75	70.75	11.18	1.23429	1.01657	In
	ic502643m_si_009_clean	0.31317	68.19	68.19	11.161	2.49056	1.18743	Si
	LARXUA_clean	0.139933	62.19	62.19	11.15	1.13519	1.11602	Zn
	VACLIX_clean	0.364284	71.64	71.64	11.1395	1.96029	1.84605	Cu
	JENKET_SL	0.35419	57.04	57.04	11.118	2.32454	1.59899	Zr,Ir
	ja512762r_si_002_auto	0.24402	69.55	69.55	11.095	1.15788	0.973062	Zn
	ZELROZ_manual	0.0906512	46.99	46.99	11.0914	1.19397	1.04543	Zr
	KUVMIZ_clean	0.796802	57.35	57.35	11.0684	1.52767	2.40763	Zn
	ADASEF_clean	0.590862	57.11	57.11	11.0076	1.43089	2.27534	Cu,Si
	PALTON_clean	0.257341	65.2	65.2	10.9231	1.97967	1.94258	Cu
	XAHPED_clean	0.0254422	56.08	56.08	10.8845	1.18083	0.935606	Cu
	TEMPEI_clean	0.328596	62.43	62.43	10.8675	1.13818	2.24283	Cu
	GUPBEZ02_clean	0.0866306	75.89	75.89	10.8658	1.44624	1.25745	Cu
	cg501730q_si_002_clean	0.230426	59.59	59.59	10.8478	2.20053	0.880553	Cu
	MILROQ_clean	0.107593	65.79	65.79	10.8434	1.40739	0.865465	Cu
	AGABIU_clean	0.21067	81.77	81.77	10.8356	1.81966	1.29297	Cu
	POTREX_clean	0.107367	67.96	67.96	10.8274	1.16103	1.14383	Ni,Li
	AVILEY_clean	0.307185	61.63	61.63	10.7986	1.36129	1.61386	Co
	ZOFZUR_clean	0.329791	63.8	63.8	10.7684	2.36125	1.28761	Ir,Hf
	XUKYEI_neutral	0.151037	59.63	59.63	10.7592	1.18291	1.36211	Mn
	VANNIK_clean	0.935277	55.78	55.78	10.7585	1.22437	3.02289	Cu
	EDUVOO_clean	0.453205	62.02	62.02	10.7008	1.13238	1.74051	U
	GISNED_clean	0.663151	54.8	54.8	10.6286	1.9696	2.3085	Zn
	OGEBAF01_clean	0.365745	52.19	52.19	10.6099	1.59134	1.84104	Zn
	OLOGEC_clean	0.173004	63.96	63.96	10.548	1.39794	1.61716	Cu
	IZOWAW_clean	0.370697	55.97	55.97	10.5352	1.2378	1.54013	Zn
	BETHIT_clean	0.151097	51.51	51.51	10.5132	1.80223	0.784073	Mo,Zn
	ja512973b_si_005_auto	0.102013	57.36	57.36	10.5086	1.53937	0.934129	Cd
	FATKIV_clean	0.834137	51.69	51.69	10.4959	2.4049	2.98262	Zr
	KARNAU_clean	0.110318	55.58	55.58	10.4851	1.41551	0.795963	Mn
	QIYDIN01_clean	0.34914	58.87	58.87	10.4817	1.48185	1.74604	Ni
	BOXFOK_clean	0.440513	59.68	59.68	10.4566	2.06583	2.10441	Cu
	POHWIU_clean	0.182007	66.18	66.18	10.4233	1.73286	0.872836	Dy
	PELRIJ_clean	0.324393	62.36	62.36	10.3936	1.53456	1.75835	Co
	FORTUD_clean	0.252827	68.45	68.45	10.3834	2.07614	1.55024	Cu
	TOVJEV_clean	0.155096	60.05	60.05	10.3818	1.68233	0.879089	Zn
	ADATAC_clean	0.608277	59.1	59.1	10.3707	1.31919	2.09469	Fe
	YUZPIU_clean	0.797625	57.73	57.73	10.2764	2.56269	2.5825	Zn
	BINROH_clean	0.332675	59.47	59.47	10.2733	2.36367	2.07772	Zn
	ANUGEW_clean	0.269866	69.05	69.05	10.2369	2.08205	1.58059	Cu
	jacs.6b04608_ja6b04608_si_003_clean	0.18327	69.16	69.16	10.2051	1.41516	1.87747	Cu
	FAYQED_clean	0.0490225	57.55	57.55	10.1837	1.74255	1.74266	Zr
	OPIFUQ_clean	0.314596	60.18	60.18	10.1499	1.23735	1.46494	Zn
	ja406030p_si_003_clean	0.0235139	82.82	82.82	10.1349	1.77594	0.913408	Sr
	SUNLET_clean	0.285615	57.73	57.73	10.1282	1.41111	1.19419	Zn,Cr
	BINRUN_clean	0.231283	69.94	69.94	10.1053	1.47201	1.18088	Cu
	ja808995d_si_002_clean	0.268667	58.57	58.57	10.0936	2.09071	1.51992	Zn
	ICODIP01_clean	0.135318	60.03	60.03	10.0389	1.75631	0.908766	Cd
	ICODIP_clean	0.120089	69.26	69.26	9.97272	1.26584	0.850859	Zn
	cg500175k_si_001_auto	0.063124	72.17	72.17	9.93166	1.2637	0.841577	Zn
	BICPUA_clean	0.0902177	77.44	77.44	9.90922	2.05638	1.5934	Cu
	OLICIX_clean	0.221174	66.16	66.16	9.90606	1.39276	1.49855	Yb
	HUFKUQ_clean	0.13677	69.7	69.7	9.89287	1.63352	1.00398	Fe
	ILITUT_manual	0.101936	50.13	50.13	9.87431	1.3114	1.30045	Cd
	IYUQID_clean	0.187585	57.46	57.46	9.84913	1.28272	1.59769	Co
	AQOMEA_clean	0.0772345	85.22	85.22	9.842	1.5334	1.28308	Na
	YORLEY_clean	0.135205	71.53	71.53	9.82464	1.61179	0.963826	Co
	VEBHUG_SL	0.0384314	51.83	51.83	9.82464	1.4366	0.398661	Ag,Au
	GAGQAI_clean	0.4411	59.66	59.66	9.82354	1.76133	1.65692	Zn
	MIXZOK_clean	0.12454	61.88	61.88	9.81587	1.59781	0.970032	Fe
	AQOLEZ_clean	0.238304	62.84	62.84	9.81049	1.34426	1.79159	Ni
	RAYMIP_clean	0.119146	71.92	71.92	9.80847	1.58728	0.926101	Co
	KADLUZ_clean	0.0135696	64.68	64.68	9.8037	1.3744	1.6086	In
	AQOMEA01_clean	0.110667	72.74	72.74	9.75466	1.46389	0.794857	Cu
	c5cc04223b_c5cc04223b2_clean	0.135205	66.54	66.54	9.72839	1.61584	0.936734	Co
	BETGUE_clean	0.078328	60.96	60.96	9.67035	1.27162	1.51983	Zn
	RAYMOV_clean	0.158382	63.28	63.28	9.65919	1.60794	0.999978	Co
	HAVZIP_clean	0.357615	62.68	62.68	9.65699	1.43984	1.91554	Mn
	ic800131r-file003_clean	0.456562	61.31	61.31	9.6087	1.34821	1.95516	Co
	MUWQEB_clean	0.394119	67.23	67.23	9.58722	1.35074	1.96496	Co
	UTEWOG_clean	0.0827445	60.61	60.61	9.57746	1.63559	1.00393	Fe
	OKABAE_clean	0.0947825	66.56	66.56	9.55269	1.52747	0.957869	Ni
	BINSAU_clean	0.0479129	97.06	97.06	9.53484	1.47608	1.18308	Cu
	SEWCED_clean	0.383186	65.06	65.06	9.52705	2.29663	1.66972	Mn
	FALBAX_manual	0.0173056	73.08	73.08	9.5104	1.28004	0.830303	Cd
	JOGSAA_clean	0.254268	57.57	57.57	9.49143	1.7018	1.79743	Co
	LIKDOA_clean	0.376843	58.9	58.9	9.4474	1.37353	1.95496	Ni
	EJETAQ_clean	0.0625509	114.56	114.56	9.41931	1.96227	1.52014	Cu
	TOZFOF_clean	0.20605	69.34	69.34	9.36877	1.33779	1.13986	Na,Eu
	RANWAH_clean	0.0279206	40.37	40.37	9.32974	1.47623	0.848752	Ru,Co
	OTALUS_clean	0.0848304	77.18	77.18	9.32901	1.79497	0.863509	Mn
	LELDUD_clean	0.215309	59.54	59.54	9.31362	1.36113	1.10898	Zn
	PUZMAZ_manual	0.191692	63.86	63.86	9.24625	1.78972	1.80955	Cu
	AWUPAL_clean	0.280465	53.04	53.04	9.23775	1.77764	1.78124	Co
	YUZPEQ_clean	0.692328	57.6	57.6	9.23563	1.99452	2.44956	In,Fe
	HUMWIX_clean	0.250798	55.94	55.94	9.22584	2.33021	1.77154	Zn
	XALTIP_clean	0.0434273	62.02	62.02	9.18322	1.63185	0.910497	Cu,Mn
	ja507947d_si_001_auto	0.315017	59.49	59.49	9.17237	2.03688	1.44916	Zn,Co
	QAGQEW_clean	0.33446	51.02	51.02	9.15991	1.91346	1.63475	Zr
	BAWROI_clean	0.100545	81.11	81.11	9.14033	1.80332	0.730652	Cd
	LEHXUT_clean	0.146054	69.15	69.15	9.13066	1.48399	1.23737	Zn
	HUQHUY_clean	0.292932	55.99	55.99	9.11981	2.73567	2.03551	Cu
	MEHMET_clean	0.0813548	66.02	66.02	9.08074	1.33436	1.16267	Zn
	VEGBUG_clean	0.25116	57.8	57.8	9.06966	2.4062	2.0372	Cu
	MATXAJ_clean	0.32411	56.96	56.96	9.06734	2.90003	1.43913	Zr
	HABRAF_manual	0.113266	75.59	75.59	9.04853	1.38144	1.24518	Zn
	DITJIB_clean	0.52859	65.95	65.95	9.03515	2.69055	2.21321	Cu
	ACUFEK_clean	0.315706	52.25	52.25	9.01147	2.25969	1.59795	Hf
	VEGCAN_clean	0.0727624	44.06	44.06	9.00897	1.72675	1.40679	Cu
	GAQYIH_clean	0.248709	56.73	56.73	8.97115	2.924	1.10453	Hf
	PODKUQ_clean	0.212494	41.39	41.39	8.96976	2.25853	1.51558	Cd
	ja809985t_si_002_clean	0.312902	67.81	67.81	8.92625	2.50033	1.95695	Cu
	YUZCON_clean	0.610107	59.77	59.77	8.92569	2.552	2.11751	Zn
	ic101935f_si_002_auto	0.0827209	58.18	58.18	8.91717	1.44158	0.596334	Mo,Zn
	QIYDAF_clean	0.495797	51.73	51.73	8.78691	1.53954	2.08269	Zn
	ja5111317_ja5111317_si_002_auto	0.470074	69.1	69.1	8.76388	2.62209	2.06721	Cu
	ja406030p_si_004_clean	0.424513	52.5	52.5	8.74134	2.44578	1.95474	Ni,Zr
	AGOFEJ_clean	0.138079	61.41	61.41	8.72571	1.42976	1.11491	Zn,Cr
	GUPCAW_clean	0.0264422	66.06	66.06	8.71559	1.44727	1.31409	Cu
	FAGQAI_clean	0.029862	56.68	56.68	8.62891	1.58151	0.911474	Cd
	DITJOH_clean	0.0979927	90.8	90.8	8.61498	1.58004	1.63459	Cu
	BAZFUF_clean	0.456849	58.05	58.05	8.59079	2.26184	1.83623	Zr
	ja512973b_si_003_auto	0.524184	71.9	71.9	8.58384	2.35861	2.54313	Cu
	PODKOK_clean	0.475987	57.53	57.53	8.58252	2.48623	2.03227	Zr
	BAZFUF01_clean	0.182473	65.27	65.27	8.56409	2.16238	1.66076	Cu
	TOVJAR_clean	0.349456	80.91	80.91	8.54605	2.35731	2.52293	Cu
	BINDAF_manual	0.225892	58.22	58.22	8.52361	1.4554	1.56693	Fe,Co
	YURJUR_clean	0.0421094	57.78	57.78	8.49712	1.54678	1.2008	Ni
	ja512973b_si_002_auto	0.139067	69.97	69.97	8.47609	1.61543	1.10487	Ce
	PUZLUS_clean	0.207183	40.11	40.11	8.47189	2.09522	1.71222	Zr
	TOVJOF_clean	0.224322	66.19	66.19	8.39804	1.79702	1.7364	Co
	TOVJIZ_clean	0.356361	54.45	54.45	8.36781	1.48486	1.71124	Fe
	EKUPEG_clean	0.372058	51.1	51.1	8.2906	1.52595	1.77897	Fe
	LAPZIO_clean	0.0817934	63.48	63.48	8.26476	1.47019	0.791723	Cu
	jacs.6b06759_ja6b06759_si_002_clean	0.234911	69.06	69.06	8.24294	1.85666	1.4267	Cu
	acs.jpcc.6b08594_Zn2Cd6MOF5_opt_clean	0.0179506	53.14	53.14	8.19624	1.80704	1.33685	Zr
	acs.inorgchem.6b01740_ic6b01740_si_002_clean	0.131593	55.34	55.34	8.11021	1.81279	1.28771	Cd,Zn
	XAKZIT_clean	0.271388	68.87	68.87	8.0633	1.94468	1.67709	Co
	jacs.6b06759_ja6b06759_si_003_clean	0.0154143	61.77	61.77	8.02038	1.52514	0.757006	Mn
	MAHCEG_clean	0.00852864	58.1	58.1	7.99425	1.92439	1.15608	Hf
	MAHCOQ_clean	0.139324	58.72	58.72	7.97271	2.32273	1.53328	Cu,Zn
	ICAQIO_clean	0.1851	55.35	55.35	7.96401	2.36556	1.51718	Zn,Co
	LAWFOF_clean	0.270952	52.58	52.58	7.95732	2.56256	2.04912	Co
	NEXVET_clean	0.149191	59.41	59.41	7.95608	1.89807	1.37812	Zn
	LAWGUM_clean	0.0824253	57.08	57.08	7.94511	1.89441	1.41465	Ni
	cg901312t_si_002_clean	0.171925	58.17	58.17	7.93483	1.90297	1.36411	Zn
	ICAROV_clean	0.108592	58.06	58.06	7.92817	1.96115	1.21183	Zn
	WAVROC_clean	0.271177	58.51	58.51	7.92146	2.56687	2.02597	Ni
	MUBZUG_auto	0.198256	52.11	52.11	7.91531	2.38591	1.49799	Mg,In
	ICAQOU_clean	0.315792	55.45	55.45	7.90997	2.35594	1.71078	Zr
	VEJHID_clean	0.266387	52.43	52.43	7.90669	2.5674	1.99373	Cu
	ZICCIZ_clean	0.0344188	53	53	7.8833	2.23934	1.23398	Cd
	jacs.6b06759_ja6b06759_si_004_clean	0.0369192	55.85	55.85	7.88152	2.16738	1.07965	Cd,Co
	MAHCIK_clean	0.0216646	56.83	56.83	7.85668	1.97163	1.38669	Zr
	OMITUB_clean	0.133515	50.1	50.1	7.81499	2.40273	1.49081	Zn
	CAVPUM_manual	0.0691727	71.55	71.55	7.7864	2.82114	1.24503	Cu
	EXOTOB_clean	0.388828	62.42	62.42	7.78019	2.62566	2.01298	Zn
	CAVPEW_manual	0.104631	66.3	66.3	7.77882	1.70815	0.988785	Ni
	BOLZIN_clean	0.284725	51.22	51.22	7.7782	2.6046	2.03581	Co
	CAVPIA_manual	0.354	60.22	60.22	7.75585	2.41269	1.72955	Zr
	IYOWID_manual	0.264543	54.01	54.01	7.75151	2.56987	1.95748	Cu
	OMIPEH_clean	0.268583	50.54	50.54	7.7477	2.6481	2.02929	Zn
	GUPDEB_clean	0.0691727	78.76	78.76	7.72557	2.81291	1.23002	Cu
	ja5b00365_si_002_clean	0.104312	60.98	60.98	7.65386	2.7028	0.761105	Cd
	CAJQIP_clean	0.369602	65.65	65.65	7.63115	2.8536	1.82528	Zn
	IZEPAF_clean	0.113408	75.87	75.87	7.61293	1.74406	1.44296	Cu
	GULWEQ_clean	0.18689	50.14	50.14	7.53546	3.19827	1.36967	Cr
	PEWLUA_clean	0.116279	53.34	53.34	7.52003	2.12513	1.03652	Cd
	ZIJSAO_clean	0.10727	71.82	71.82	7.51947	2.36336	1.36598	Cu
	AQOLID_clean	0.271276	67.53	67.53	7.50871	2.70747	1.74594	Tb
	FOSTUE_clean	0.0286291	95.29	95.29	7.44821	2.07586	0.559948	Co
	HULCOI_clean	0.0811021	55.98	55.98	7.43748	1.76077	1.29638	In
	ASINEX_clean	0.109943	54.11	54.11	7.36184	2.64697	1.31459	Cu
	MEJMOE_clean	0.0173115	62.57	62.57	7.27061	1.72416	1.06277	Zn
	ja406030p_si_006_manual	0.0838314	71.23	71.23	7.20564	1.85422	1.30713	Zn
	WAHNOL_clean	0.0170654	63.53	63.53	7.19983	1.71681	1.09186	Zn,Cr
	WAHKUO_clean	0.0326705	71.91	71.91	7.17077	2.25293	1.55913	Cu
	CIRTUU_clean	0.0621422	68.72	68.72	7.16155	2.26332	1.30643	Cu,Ti
	ALEJEI_clean	0.0951615	60.03	60.03	7.15132	2.1817	1.33412	Cu
	MUBZOA_auto	0.113834	76.47	76.47	7.13825	2.53074	1.3033	Cu
	ALEJIM_clean	0.294372	49.25	49.25	7.12	2.63022	1.84133	Zr
	c5cc10203k_c5cc10203k2_clean	0.169618	71.92	71.92	7.10984	2.56112	1.32247	Zn
	WAHNIF_clean	0.0251311	62.66	62.66	7.03802	2.28907	1.5658	Cu
	REWNEO01_clean	0.0258129	68.43	68.43	6.94786	2.30679	1.24392	Cu,Zr
	LEVLEF_clean	0.10727	74.68	74.68	6.94262	2.66629	1.35397	Cu
	KOZQEX_clean	0.0680603	66.68	66.68	6.8654	2.93952	0.696933	Mg
	XICNOO01_clean	0.309578	62	62	6.86083	3.26835	1.95584	Cu
	WIRKOZ_clean	0.0847601	64.08	64.08	6.85327	2.84599	0.822132	Zr
	WAHNEB_clean	0.165464	59.72	59.72	6.83963	2.54187	0.897341	Zn
	REWNEO_clean	0.0333885	70.77	70.77	6.79866	2.34728	1.57739	Cu
	IZEPEJ_clean	0.10727	65.54	65.54	6.76945	2.86186	1.30608	Cu
	ADASUV_clean	0.319849	48.08	48.08	6.75259	3.53559	1.42862	Cr
	OMIMEE_clean	0.0844956	60.34	60.34	6.7332	2.54972	1.22616	Co
	XICNOO02_clean	0.0657391	74.67	74.67	6.7257	2.46007	0.991516	Cu
	XICYUF_clean	0.0839125	67.35	67.35	6.72401	2.91346	0.827829	Zr
	ADASOP_clean	0.0792782	61.44	61.44	6.71408	4.27145	0.709342	Zr
	XICNOO_clean	0.119418	54.04	54.04	6.71346	2.692	1.24216	Zn
	SIZPUN_clean	0.00593321	49.54	49.54	6.71064	2.92314	0.826971	Zr
	ic5029383_si_002_clean	0.11305	72.08	72.08	6.71018	2.86511	1.09115	Zn
	YUZPOA_clean	0.145427	62.57	62.57	6.70448	2.07266	1.27192	Zn
	XICZAM_clean	0.208478	62.83	62.83	6.66271	3.01488	1.32043	Zn
	MUDTAH_clean	0.0372488	60.36	60.36	6.64584	2.93738	0.594564	Hf
	WUKXEH_clean	0.212833	58.7	58.7	6.63386	2.84807	1.40806	Zn
	ADASIJ_clean	0.155735	70.17	70.17	6.60038	3.04337	1.32814	Cu
	MUDTEL_clean	0.0543621	77.51	77.51	6.60024	2.76268	1.21573	Cu
	VUJBEI_clean	0.0905237	73.87	73.87	6.59272	2.8964	1.41074	Cu
	RAHNOF_clean	0.0893038	50.72	50.72	6.57566	2.80546	1.39955	Zn
	KUNSUJ_clean	0.0872706	64.66	64.66	6.57368	2.89617	1.30553	Cu
	NAYZOE_clean	0.113703	61.17	61.17	6.52688	2.74065	1.2012	In,Eu
	NEYVEU_clean	0.0259035	81.94	81.94	6.52553	2.42481	1.62953	Cu
	ja110042b_si_003_clean	0.228864	48.04	48.04	6.42425	3.14149	1.54653	Zn
	ADUWON_clean	0.125692	58.47	58.47	6.41603	2.92626	1.24675	Co
	UMODEH16_clean	0.0916897	64.38	64.38	5.99724	2.73115	1.50485	Ni
	YEYCUC_SL	0.11496	79.26	79.26	5.98917	2.17485	1.69003	Cu
	GIXGOK_clean	0.00262784	41.9	41.9	5.70059	3.1266	1.39316	Zr
	GOBGAG_clean	0.0966893	53.88	53.88	5.40179	3.21548	0.621382	Cd
	FAYPAY_clean	0.0966893	57.05	57.05	5.3381	3.23418	0.628815	Cd
	MACHIJ_clean	0.108515	63.53	63.53	5.24047	2.46313	1.10099	Zn
	QOYYOU_clean	0.0906825	76.14	76.14	4.97277	2.67379	0.681578	Zn
		0.0821962	54.43	54.43	4.51928	4.64329	0.75743	Zn
